# Supplementary material for: A Pan-cancer Landscape of Interactions between Solid Tumors and Infiltrating Immune Cell Populations
Source: Oxford University Press journal article supplement (doi:10.1158/1078-0432.ccr-17-3509), 2018-04-17
Supplement: 10780432ccr173509-sup-192911_3_supp_4675335_p6rxmz.xlsx [file 10780432ccr173509-sup-192911_3_supp_4675335_p6rxmz.xlsx]

## Sheet: TableS1A
Cell type	Cell type abbreviation	Source
B cells	B cells	Bindea et al 2013	ABCB4	BACH2	BCL11A	BLK	BLNK	CCR9	CD19	CD72	COCH	CR2	DTNB	FCRL2	GLDC	GNG7	HLA-DOB	HLA-DQA1	IGHA1	IGHG1	IGHM	IGKC	IGL	KIAA0125	MEF2C	MICAL3	MS4A1	OSBPL10	PNOC	QRSL1	SCN3A	SLC15A2	SPIB	TCL1A	TNFRSF17
Eosinophils	Eosinophils	Bindea et al 2013	ABHD2	ACACB	C9orf156	CAT	CCR3	CLC	CYSLTR2	EMR1	EPN2	GALC	GPR44	HES1	HIST1H1C	HRH4	IGSF2	IL5RA	KBTBD11	KCNH2	LRP5L	MYO15B	RCOR3	RNASE2	RRP12	SIAH1	SMPD3	SYNJ1	TGIF1	THBS1	THBS4	TIPARP	TKTL1
Macrophages	Macrophages	Bindea et al 2013	APOE	ATG7	BCAT1	CCL7	CD163	CD68	CD84	CHI3L1	CHIT1	CLEC5A	COL8A2	COLEC12	CTSK	CXCL5	CYBB	DNASE2B	EMP1	FDX1	FN1	GM2A	GPC4	KAL1	MARCO	ME1	MS4A4A	MSR1	PCOLCE2	PTGDS	RAI14	SCARB2	SCG5	SGMS1	SULT1C2
Mast cells	Mast cells	Bindea et al 2013	ABCC4	ADCYAP1	CALB2	CEACAM8	CMA1	CPA3	CTSG	ELA2	GATA2	HDC	HPGD	HPGDS	KIT	LINC01140	MAOB	MLPH	MPO	MS4A2	NR0B1	PPM1H	PRG2	PTGS1	SCG2	SIGLEC6	SLC18A2	SLC24A3	TAL1	TPSAB1	TPSB2	VWA5A
NK CD56bright cells	Nkbrigh	Bindea et al 2013	DUSP4	FOXJ1	LPCAT4	MADD	2017-03-06	MPPED1	MUC3B	NIBP	PLA2G6	RRAD	XCL1
NK CD56dim cells	Nkdim	Bindea et al 2013	EDG8	FLJ20699	GTF3C1	GZMB	IL21R	KIR2DL3	KIR2DS1	KIR2DS2	KIR2DS5	KIR3DL1	KIR3DL2	KIR3DL3	KIR3DS1	SPON2	TMEPAI
Neutrophils	Neutrophils	Bindea et al 2013	ALPL	BST1	CD93	CEACAM3	CREB5	CRISPLD2	CSF3R	CYP4F3	DYSF	FCAR	FCGR3B	FLJ11151	FPR1	FPRL1	G0S2	HIST1H2BC	HPSE	IL8RA	IL8RB	KCNJ15	LILRB2	MGAM	MME	PDE4B	S100A12	SIGLEC5	SLC22A4	SLC25A37	TECPR2	TNFRSF10C	VNN3
T helper cells	Th	Bindea et al 2013	ANP32B	ASF1A	ATF2	BATF	C13orf34	CD28	DDX50	FAM111A	FRYL	GOLGA8A	ICOS	ITM2A	LRBA	NAP1L4	NUP107	PHF10	PPP2R5C	RPA1	SEC24C	SLC25A12	SRSF10	TRA	UBE2L3	YME1L1
Tcm cells	Tcm	Bindea et al 2013	AQP3	ATF7IP	ATM	CASP8	CDC14A	CEP68	CLUAP1	CREBZF	CYLD	DOCK9	FAM153B	FOXP1	FYB	HNRPH1	INPP4B	KLF12	LOC441155	MAP3K1	MLL	N4BP2L2-IT2	NEFL	NFATC3	PCM1	PCNX	PDXDC2	PHC3	POLR2J2	PSPC1	REPS1	RPP38	SLC7A6	SNRPN	ST3GAL1	STX16	TIMM8A	TRAF3IP3	TXK	TXLNGY	USP9Y
Tem cells	Tem	Bindea et al 2013	AKT3	C7orf54	CCR2	DDX17	EWSR1	FLI1	GDPD5	LTK	MEFV	NFATC4	PRKY	TBC1D5	TBCD	TRA	VIL2
Tfh cells	Tfh	Bindea et al 2013	B3GAT1	BLR1	C18orf1	CDK5R1	CHGB	CHI3L2	CXCL13	HEY1	HIST1H4K	ICA1	KCNK5	KIAA1324	MAF	MAGEH1	MKL2	MYO6	MYO7A	PASK	PDCD1	POMT1	PTPN13	PVALB	SH3TC1	SIRPG	SLC7A10	SMAD1	ST8SIA1	STK39	THADA	TOX	TSHR	ZNF764
aDC	aDC	Bindea et al 2013	CCL1	EBI3	INDO	LAMP3	OAS3
iDC	iDC	Bindea et al 2013	ABCG2	BLVRB	CARD9	CD1A	CD1B	CD1C	CD1E	CH25H	CLEC10A	CSF1R	CTNS	F13A1	FABP4	FZD2	GSTT1	GUCA1A	HS3ST2	LMAN2L	MMP12	MS4A6A	NUDT9	PDXK	PPARG	PREP	RAP1GAP	SLC26A6	SLC7A8	SYT17	TACSTD2	TM7SF4	VASH1
Activated CD8 T cell	CD8+ T	Charoentong et al 2016	ADRM1	AHSA1	C1GALT1C1	CCT6B	CD37	CD3D	CD3E	CD3G	CD69	CD8A	CETN3	CSE1L	GEMIN6	GNLY	GPT2	GZMA	GZMH	GZMK	IL2RB	LCK	MPZL1	NKG7	PIK3IP1	PTRH2	TIMM13	ZAP70
Gamma delta T cell	Tgd	Charoentong et al 2016	ACP5	AQP9	BTN3A2	C1orf54	CARD8	CCL18	CD209	CD33	CD36	CDK5	IL10RB	KLRF1	LGALS1	MAPK7	KLHL7	KRT80	LAMC1	LCORL	LMNB1	MEIS3P1	MPL	FABP1	FABP5	FADD	MFAP3L	MINPP1	RPS24	RPS7	RPS9	DBNL	CCL13
Regulatory T cell	Treg	Charoentong et al 2016	CCL3L1	CD72	CLEC5A	FOXP3	ITGA4	L1CAM	LIPA	LRP1	LRRC42	MARCO	MMP12	MNDA	MRC1	MS4A6A	PELO	PLEK	PRSS23	PTGIR	ST8SIA4	STAB1
Cytotoxic cells	Cytotoxic cells	Bindea et al 2013	APBA2	APOL3	CTSW	DUSP2	GNLY	GZMA	GZMH	KLRB1	KLRD1	KLRF1	KLRK1	NKG7	RORA	RUNX3	SIGIRR	WHAMMP3	ZBTB16

## Sheet: TableS1B
Pathway	Displayed name (Figure 5)	Source
Angiogenesis (Senbabaoglu et al)	Angiogenesis (Senbabaoglu et al)	DOI:10.1186/s13059-016-1092-z	CDH5	ELTD1	CLEC14A	LDB2	ECSCR	MYCT1	RHOJ	VWF	TIE1	KDR	ESAM	PTPRB	GPR116	SPARCL1	EMCN	ROBO4	ENG	TEK	S1PR1	A2M	JAM2	COL15A1	PECAM1	CALCRL	CLEC3B	PLVAP	RGS5	LRRC32	EBF1	ADCY4	ACVRL1	GPR124	APLNR	TM4SF18	GNG11	CNRIP1	ZNF423	GIMAP8	PDGFD	ITGA9	EDNRB
WEBER_METHYLATED_ICP_IN_SPERM_DN	Methylated ICP in sperm DN (Weber et al)	MSigDB	ADAM18	ADAM2	DDX4	HIST1H1T	HIST1H2BA	HORMAD1	LDHC	PDHA2	PPP3R2	PRAME	RNF17	TCEB3B	TEX12	TUBA3C
REACTOME_NUCLEOTIDE_EXCISION_REPAIR	Nucleotide excision repair	MSigDB	CDK7	POLD3	ERCC8	DDB1	DDB2	ERCC1	ERCC2	ERCC3	ERCC4	ERCC5	ERCC6	GTF2H1	GTF2H2	GTF2H3	GTF2H4	LIG1	MNAT1	PCNA	POLD1	POLD2	POLE	POLE2	POLR2A	POLR2B	POLR2C	POLR2D	POLR2E	POLR2F	POLR2G	POLR2H	POLR2I	POLR2J	POLR2K	POLR2L	XAB2	POLD4	RAD23B	RFC2	RFC3	RFC4	RFC5	RPA1	RPA2	RPA3	LOC652672	LOC652857	GTF2H2B
REACTOME_BASE_EXCISION_REPAIR	Base excision repair	MSigDB	CCNO	POLD3	FEN1	SMUG1	APEX1	LIG1	LIG3	MPG	MUTYH	NTHL1	OGG1	PCNA	POLB	POLD1	POLD2	POLD4	TDG	XRCC1	MBD4
REACTOME_CELL_CYCLE_MITOTIC	Cell cycle mitotic	MSigDB	KIF20A	ACTR1A	AKAP9	CDK2	CDK4	CDK6	PSMD14	CDK7	CDKN1A	CDKN1B	STAG1	CDKN2A	CDKN2B	CDKN2C	CDKN2D	TUBB4A	TUBB4B	ANAPC10	NDC80	TUBGCP3	DCTN2	CENPA	CENPC1	CETN2	POLD3	NUDC	PLK4	STAG2	SDCCAG8	TUBGCP2	DBF4	KIF2C	CNTRL	UBE2C	FGFR1OP	ZWINT	CEP250	PMF1	DCTN3	TUBGCP5	CKS1B	NEDD1	LIN54	PSMA8	CSNK1D	CSNK1E	SPC24
HALLMARK_NOTCH_SIGNALING	NOTCH signaling	MSigDB	JAG1	NOTCH3	NOTCH2	APH1A	HES1	CCND1	FZD1	PSEN2	FZD7	DTX1	DLL1	FZD5	MAML2	NOTCH1	PSENEN	WNT5A	CUL1	WNT2	DTX4	SAP30	PPARD	KAT2A	HEYL	SKP1	RBX1	TCF7L2	ARRB1	LFNG	PRKCA	DTX2	ST3GAL6	FBXW11
REACTOME_CHEMOKINE_RECEPTORS_BIND_CHEMOKINES	Chemokine receptors bind chemokines	MSigDB	CXCL13	CXCR6	CCR9	CCL27	CCR1	CCR2	CCR3	CCR4	CCR5	CCR6	CCR7	CCR8	CCBP2	CX3CR1	CCR10	XCR1	CXCR3	CXCL1	CXCL2	CXCL3	IL8	CXCR1	CXCR2	CXCL10	CCL3L3	CXCL9	CCRL1	PF4	PPBP	CCL28	CXCR7	CXCL16	CCL2	CCL3	CCL3L1	CCL4	CCL5	CCL7	CCL11	CCL16	CCL17	CCL19	CCL20	CCL21	CCL22	CCL25	CXCL6
KEGG_OXIDATIVE_PHOSPHORYLATION	Oxidative phosphorylation	MSigDB	ATP6V1G1	UQCR10	NDUFA5	NDUFA4	COX6CP3	PPA2	ATP5J2	NDUFS7	CYTB	ATP6V0A1	ATP6V1G2	ATP6V0B	ATP5O	COX2	COX1	ATP6AP1	COX8C	COX3	COX5B	COX4I1	ATP6V0A4	ATP12A	ATP6	ATP8	ATP5H	NDUFA2	NDUFA3	NDUFA1	LOC100133737	ATP5G1P5	UQCRQ	ATP6V1H	ATP5D	LHPP	ATP6V0D2	COX7A2L	ATP5G3	ATP6V1C2	ATP5G2	ATP5G1	ATP5F1	ATP5E	COX5A	TCIRG1	UQCRHL	ATP4B	ATP6V1D
HALLMARK_EPITHELIAL_MESENCHYMAL_TRANSITION	Epithelial mesenchymal transition	MSigDB	COL3A1	COL5A2	COL5A1	FBN1	COL1A1	FN1	COL6A3	SERPINE1	COL1A2	COL4A1	COL4A2	VCAN	IGFBP3	TGFBI	SPARC	LUM	LAMC1	LOX	LAMC2	CTGF	TAGLN	COL7A1	LOXL2	COL6A2	ITGAV	THBS2	COL16A1	NNMT	TPM1	CDH2	MMP2	COL11A1	THBS1	FAP	BGN	SERPINH1	FSTL1	POSTN	THY1	SPP1	TNC	TFPI2	NID2	ITGB5	MMP3	VIM	LOXL1
HALLMARK_WNT_BETA_CATENIN_SIGNALING	WNT βcatenin signaling	MSigDB	MYC	CTNNB1	JAG2	NOTCH1	DLL1	AXIN2	PSEN2	FZD1	NOTCH4	LEF1	AXIN1	NKD1	WNT5B	CUL1	JAG1	MAML1	KAT2A	GNAI1	WNT6	PTCH1	NCOR2	DKK4	HDAC2	DKK1	TCF7	WNT1	NUMB	ADAM17	DVL2	PPARD	NCSTN	HDAC5	CCND2	FRAT1	CSNK1E	RBPJ	FZD8	TP53	SKP2	HEY2	HEY1	HDAC11
HALLMARK_ANGIOGENESIS	Angiogensis	MSigDB	VCAN	POSTN	FSTL1	LRPAP1	STC1	LPL	VEGFA	PF4	THBD	FGFR1	TNFRSF21	CCND2	COL5A2	ITGAV	SERPINA5	KCNJ8	APP	JAG1	COL3A1	SPP1	NRP1	OLR1	PDGFA	PTK2	SLCO2A1	PGLYRP1	VAV2	S100A4	MSX1	VTN	TIMP1	APOH	PRG2	JAG2	LUM	CXCL6
HALLMARK_COMPLEMENT	Complement	MSigDB	C2	C1S	CFB	C1R	SERPINE1	MMP14	SERPING1	CTSL1	F5	MMP13	F7	CTSS	LGMN	PLG	C1QA	CASP1	GZMA	ADAM9	CALM3	C1QC	TIMP1	DPP4	KLK1	KLKB1	CD59	CR2	MMP15	LAP3	SPOCK2	F10	CTSB	SERPINA1	CTSO	CD40LG	CBLB	PDP1	C4BPB	PLEK	GP9	PLAUR	C3	F2	CASP4	STX4	CTSC	USP15	CR1
HLA class I and II	HLA class I and II family	Manually curated	HLA-A	HLA-B	HLA-C	TAP1	TAP2	TAPBP	B2M	HLA-E	HLA-G	HLA-F	HLA-DOA	HLA-DOB	HLA-DMB	HLA-DMA	HLA-DRB3	HLA-DPA1	HLA-DPB1	HLA-DQA1	HLA-DQA2	HLA-DQB1	HLA-DRB1	HLA-DRA
HALLMARK_IL2_STAT5_SIGNALING	IL2 JAK STAT5 signaling	MSigDB	SOCS2	CISH	PIM1	IL2RA	TNFRSF4	SOCS1	TNFRSF9	XBP1	RRAGD	HK2	PHLDA1	IL2RB	CTLA4	NFIL3	CD83	IKZF2	IL10	TNFRSF18	DHRS3	ECM1	ADAM19	SLC2A3	HIPK2	BATF3	BHLHE40	PTGER2	DENND5A	ITIH5	PHTF2	GADD45B	NRP1	NCOA3	CD79B	AHR	TNFRSF1B	NDRG1	BCL2L1	GABARAPL1	LIF	TIAM1	BMPR2	MAP3K8	RHOB	MYC	S100A1	METTL20	CAPG
HALLMARK_GLYCOLYSIS	Glycolysis	MSigDB	PGK1	ALDOA	ENO1	TPI1	PFKP	ERO1L	ALDOB	VEGFA	MXI1	PKM2	HK2	LDHA	EXT1	SLC25A10	GUSB	PFKFB1	PGAM1	PYGB	AK4	P4HA1	PMM2	FAM162A	SDC1	EGLN3	PC	B4GALT7	FBP2	IGFBP3	CHPF	B3GAT3	CHST12	HS2ST1	MPI	GNPDA1	AKR1A1	PPFIA4	B3GAT1	CHPF2	G6PD	MDH2	CHST6	PGLS	PGAM2	CHST1	GPC1	TSTA3	ALG1
HALLMARK_IL6_JAK_STAT3_SIGNALING	IL6 JAK STAT3 signaling	MSigDB	IL4R	IL6ST	STAT1	IL1R1	CSF2RB	SOCS3	STAT3	OSMR	IL2RG	IFNGR1	TYK2	IL13RA1	TLR2	IFNGR2	IL10RB	IL6	IL1R2	IL3RA	IFNAR1	TNFRSF1A	MYD88	ACVR1B	CSF3R	ITGB3	REG1A	CXCL1	A2M	CSF2RA	IL15RA	IRF9	PDGFC	HAX1	BAK1	EBI3	INHBE	CRLF2	TNFRSF1B	CD14	PTPN1	PTPN2	IL1B	CSF1	IL18R1	TNF	PF4	CXCL13	LTBR
REACTOME_EXTENSION_OF_TELOMERES	Extension of telomeres	MSigDB	POLD3	RUVBL2	DKC1	DNA2	FEN1	POLA2	LIG1	PCNA	POLA1	POLD1	POLD2	POLE	POLE2	WRAP53	PRIM1	PRIM2	NHP2	POLD4	RFC2	RFC3	RFC4	RFC5	RPA1	RPA2	RPA3	TERT	RUVBL1
HALLMARK_E2F_TARGETS	E2F targets	MSigDB	AURKA	BRCA2	CCP110	CENPE	CKS2	DCLRE1B	DNMT1	DONSON	EED	GINS1	GINS4	H2AFZ	LIG1	MAD2L1	MCM2	MCM4	MCM5	MCM7	MELK	MMS22L	NAA38	NASP	NUDT21	NUP205	ORC6	PCNA	PLK4	POLE	PRIM2	RAD51AP1	RFC2	RPA2	RPA3	SUV39H1	TMPO	UBE2T	WDR90	CDK1	MCM3	TOP2A	MCM6	BIRC5	CCNB2	RRM2	HMGB2	BUB1B	RFC3
Pro-inflamatory cytokines&chemokines	Pro-inflamatory cytokines&chemokines	Manually curated	CXCL10	CCL5	CCL4	CCL3	CX3CL1	IL1A	IL1B	TNF	IFNG	IL12A	IL18
HALLMARK_ALLOGRAFT_REJECTION	Allograft rejection	MSigDB	PTPRC	IL12B	TGFB1	IL12A	CD3E	CD3D	CD28	LYN	HCLS1	IL18	CRTAM	IFNG	CD3G	CD86	IL10	UBE2N	BCL10	CD4	LCK	NCK1	C2	HLA-A	ITGB2	HLA-DQA1	CD1D	CD80	HLA-DRA	THY1	TLR1	HLA-G	HLA-DMB	IL7	IL4	TNF	CD247	IL2	HLA-DMA	STAT1	IRF4	SRGN	INHBA	TLR3	ZAP70	CD74	CD40	TRAF2	B2M
HALLMARK_INTERFERON_GAMMA_RESPONSE	Interferon gamma response	MSigDB	STAT1	ISG15	IFIT1	MX1	IFIT3	IFI35	IRF7	IFIT2	OAS2	TAP1	EIF2AK2	RSAD2	MX2	IRF1	OAS3	TNFSF10	IRF9	CXCL10	IFI44	BST2	XAF1	SP110	OASL	PSMB8	IFI44L	IFITM3	DDX60	LGALS3BP	GBP4	IRF8	PSMB9	PML	IFIH1	UBE2L6	IFI27	ADAR	LY6E	STAT2	CXCL9	IL10RA	PLA2G4A	TRIM21	USP18	PTGS2	EPSTI1	C1S	DDX58
HALLMARK_BILE_ACID_METABOLISM	Bile acid metabolism	MSigDB	SCP2	ABCD3	SLC27A2	HSD3B7	HSD17B4	AKR1D1	ABCD2	PEX1	CYP8B1	PNPLA8	PHYH	SLC27A5	CYP7B1	CYP27A1	PEX26	AGXT	PEX7	CROT	CYP39A1	ABCA3	CYP7A1	HACL1	PIPOX	PEX6	SOD1	GNPAT	HSD3B1	ABCA2	HAO1	PEX16	ABCD1	ACSL1	MLYCD	ABCG8	AQP9	ISOC1	NR1H4	PEX19	NPC1	HSD17B11	AMACR	CYP46A1	PEX13	IDH1	PEX11A	HSD17B6	EPHX2
HALLMARK_APOPTOSIS	Apoptosis	MSigDB	CASP3	CASP9	DFFA	CASP7	CFLAR	BIRC3	PMAIP1	CASP8	JUN	BCL2L11	MCL1	IL1B	SPTAN1	DIABLO	BAX	BIK	IL1A	BID	CDKN1A	GADD45A	DDIT3	CDKN1B	TNF	GSN	TNFSF10	CASP6	SQSTM1	FASLG	EGR3	CD44	FAS	IL18	IGFBP6	PRF1	DAP	CCND1	BTG3	F2R	SATB1	BNIP3L	CASP4	TNFRSF12A	CREBBP	RHOB	GPX3	PDGFRB	TSPO
KEGG_SPLICEOSOME	Splicesome	MSigDB	EFTUD2	LSM5	SF3A1	HNRNPA1L2	SF3B2	PRPF19	SNRNP27	HNRNPA3	LSM6	USP39	DDX42	NCBP1	SF3B1	MAGOH	CDC40	SF3B3	SRSF9	ACIN1	TXNL4A	TCERG1	U2AF2	RBM17	PRPF38B	THOC1	PLRG1	CCDC12	MAGOHB	HSPA8	LSM7	CHERP	NAA38	PQBP1	RBMX	LSM4	EIF4A3	SF3A3	DDX46	RBM25	PRPF40A	THOC3	NHP2L1	PRPF40B	LSM2	SRSF8	SF3A2	SMNDC1	BCAS2
HALLMARK_DNA_REPAIR	DNA repair	MSigDB	POLR2H	POLR2A	POLR2G	POLR2E	POLR2J	POLR2F	POLR2C	POLR2K	GTF2H3	POLR2D	ERCC3	DDB2	POLR1C	XPC	PCNA	POLR2I	SUPT4H1	POLD3	POLR3GL	POLR3C	GTF2B	POLR1D	NCBP2	RDBP	GTF2F1	ERCC5	LIG1	ERCC1	ERCC4	POLD4	COBRA1	RFC2	ELL	TAF10	RRM2B	SUPT5H	RPA3	SNAPC5	SSRP1	RFC3	RPA2	TCEB3	TAF12	TH1L	TAF13	TAF6	TAF9
REACTOME_TRANSCRIPTION	Transcription	MSigDB	THOC4	CDK7	CDK9	SRRM1	SNAPC5	POLR3F	POLR3C	PAPOLA	EHMT2	RNPS1	CLP1	NUDT21	POLR3A	LZTS1	SUPT16H	CBX3	U2AF2	HIST4H4	HIST2H3C	HIST3H2BB	LSM11	CSTF1	CSTF2	CSTF3	POLR3H	ERCC2	ERCC3	ERCC6	NCBP2	HIST1H2BA	POLR1A	ZNF473	COBRA1	PTRF	GTF2A1	GTF2A2	GTF2B	GTF2E1	GTF2E2	GTF2F1	GTF2F2	GTF2H1	GTF2H2	GTF2H3	GTF2H4	BRF1	GTF3C2
HALLMARK_HEDGEHOG_SIGNALING	Hedgehog signaling	MSigDB	SHH	PTCH1	NRCAM	NRP1	SCG2	AMOT	UNC5C	GPR56	HEY1	GLI1	THY1	SLIT1	CDK6	HEY2	NRP2	TLE3	TLE1	L1CAM	PLG	NKX6-1	NF1	RASA1	ETS2	RTN1	CRMP1	MYH9	VEGFA	CELSR1	CNTFR	ACHE	PML	CDK5R1	VLDLR	OPHN1	LDB1	DPYSL2
REACTOME_EXTRACELLULAR_MATRIX_ORGANIZATION	Extracellular matrix organization	MSigDB	CRTAP	LEPREL2	MMP24	CMA1	COL1A1	COL1A2	COL2A1	COL3A1	COL4A1	COL4A2	COL4A3	COL4A4	COL4A5	COL4A6	COL5A1	COL5A2	COL6A1	COL6A2	COL6A3	COL7A1	COL8A1	COL8A2	COL9A1	COL9A2	COL9A3	COL10A1	COL11A1	COL11A2	COL12A1	COL13A1	COL15A1	COL16A1	COL17A1	COL19A1	ADAMTS14	CTRB1	CTSG	COL22A1	ELANE	GLT25D2	COL24A1	PCOLCE2	COL28A1	KLK2	KLKB1	MMP1	MMP2
HALLMARK_HYPOXIA	Hypoxia	MSigDB	PDK1	GBE1	PFKL	ALDOA	ENO2	PGM1	NDRG1	HK2	ALDOC	GPI	MXI1	SLC2A1	P4HA1	ADM	P4HA2	ENO1	PFKP	AK4	FAM162A	PFKFB3	VEGFA	BNIP3L	TPI1	ERO1L	KDM3A	CCNG2	LDHA	GYS1	GAPDH	BHLHE40	ANGPTL4	JUN	SERPINE1	LOX	GCK	PPFIA4	MAFF	DDIT4	SLC2A3	IGFBP3	NFIL3	FOS	RBPJ	HK1	CITED2	ISG20	GALK1
REACTOME_LIPOPROTEIN_METABOLISM	Lipoprotein metabolism	MSigDB	CETP	APOA5	ABCA1	A2M	ALB	LDLRAP1	HSPG2	APOA1	APOA2	APOB	APOC2	APOC3	APOE	LCAT	LDLR	LIPC	LPA	LPL	MTTP	P4HB	SAR1B	PLTP	SDC1	BMP1	CUBN	AMN	SCARB1	ABCG1
HALLMARK_PROTEIN_SECRETION	Protein secretion	MSigDB	ARCN1	TMED10	COPB2	RAB14	ATP7A	COPB1	LAMP2	EGFR	IGF2R	COPE	PPT1	AP3S1	BET1	CLCN3	AP2S1	CLTC	AP2M1	RER1	KIF1B	ARF1	OCRL	ICA1	MON2	ARFGEF2	TMED2	NAPG	TMX1	PAM	SCAMP1	SH3GL2	RAB2A	COG2	VAMP3	ERGIC3	DOPEY1	VAMP4	VPS4B	NAPA	GNAS	STX7	SEC22B	VPS45	STX16	YKT6	SNX2	ARFGEF1	CLTA
HALLMARK_MITOTIC_SPINDLE	Mitotic spindle	MSigDB	ARHGEF2	CLASP1	KIF11	KIF23	ALS2	ARF6	MYO9B	MYH9	TUBGCP3	CKAP5	RACGAP1	PREX1	ARHGEF3	NUMA1	SPTBN1	KIF2C	KIF5B	TTK	APC	CEP250	PAFAH1B1	CDC42EP2	KIF3B	CCDC88A	KIF15	BIRC5	CNTROB	NF1	TSC1	CDC27	CNTRL	TUBGCP5	KIF4A	MAPRE1	FGD6	BRCA2	PLK1	RASA1	NEK2	WASF1	TOP2A	TRIO	ARHGEF11	KATNB1	PRC1	ANLN	CDK5RAP2
REACTOME_DOUBLE_STRAND_BREAK_REPAIR	Double strand break repair	MSigDB	RAD50	XRCC6	H2AFX	LOC389901	LIG1	LIG4	MRE11A	NBN	ATM	TDP1	PRKDC	RAD51	RAD52	RPA1	RPA2	RPA3	LOC651610	BRCA1	BRCA2	TP53BP1	XRCC4	XRCC5	BRIP1	MDC1
KEGG_RNA_DEGRADATION	RNA degradation	MSigDB	MPHOSPH6	SKIV2L2	PATL1	EXOSC4	PNPT1	EXOSC2	SKIV2L	XRN2	EXOSC5	TTC37	LSM6	EXOSC3	EXOSC1	EDC4	CNOT3	CNOT2	XRN1	PARN	C1D	PAPOLA	DDX6	DCP1A	ZCCHC7	ENO1	CNOT4	CNOT7	PAPD7	EXOSC8	C1DP3	HSPA9	LSM1	CNOT6L	EXOSC6	LSM7	NAA38	RQCD1	LSM4	CNOT1	CNOT10	EXOSC7	LSM3	DIS3	ENO3	ENO2	CNOT6	C1DP2	LSM2
Suppressive cytokines	Suppressive cytokines	Manually curated	IL4	IL13	IL17	TGFB1	IDO1
Cancer germline antigens (Rooney et al)	Cancer germline antigens (Rooney et al)	PMID:25594174	ADAM2	BRDT	CAGE1	CALR3	CCDC83	CPXCR1	CSAG2	CT45A1	CT47A1	CT47A6	CT47A7	CTAG1	DDX53	DNAJB8	DPPA2	FAM46D	FMR1NB	FTHL17	GAGE1	LUZP4	MAGEA1	MAGEA10	MAGEA2	MAGEA3	MAGEA4	MAGEA5	MAGEA6	MAGEA9B	MAGEB1	MAGEB2	MAGEB3	MAGEB6	MAGEC1	ODF3	ODF4	PAGE1	PAGE3	PASD1	POTEA	POTEB	POTED	PRSS54	SLCO6A1	SPANXC	SPANXN1	SPANXN2	SPANXN3
HALLMARK_INFLAMMATORY_RESPONSE	Inflammatory response	MSigDB	CXCL10	CCL2	CCL5	FPR1	CCL20	IL1A	IL8	CCL7	CCL22	CXCL11	CCR7	EDN1	CD40	CXCL9	IL6	IL1B	TLR2	IL1R1	CD69	ICAM1	CCRL2	AQP9	EREG	C3AR1	GNA15	CMKLR1	PTGER4	LIF	IL15	NAMPT	OPRK1	ITGB8	PTAFR	ADM	PLAUR	NFKB1	INHBA	OSM	TNFSF10	TNFSF15	IFNGR2	EMR1	IL12B	CSF1	CXCL6	TNFRSF9	LYN
HALLMARK_UNFOLDED_PROTEIN_RESPONSE	Unfolded protein response	MSigDB	ATF4	HERPUD1	PARN	EXOSC4	HSP90B1	XBP1	EXOSC9	HSPA5	ATF3	EXOSC1	EXOSC5	ASNS	ARFGAP1	WFS1	SRPRB	DNAJB9	TSPYL2	NFYA	CALR	KHSRP	DNAJC3	EXOSC2	NOP14	ATF6	HYOU1	RRP9	NOP56	CXXC1	IGFBP1	CNOT4	DCP2	PDIA6	ATP6V0D1	PREB	SEC31A	GOSR2	SERP1	NFYB	NHP2	DCTN1	SLC7A5	SSR1	EDEM1	EDC4	EIF2AK3	MTHFD2	SRPR
HALLMARK_G2M_CHECKPOINT	G2M checkpoint	MSigDB	AURKA	CCNA2	TOP2A	CCNB2	CENPA	BIRC5	CDC20	PLK1	TTK	PRC1	NDC80	KIF11	NUSAP1	CKS2	KIF2C	MKI67	AURKB	TPX2	SMC4	BUB1	CENPF	RACGAP1	CENPE	KIF23	UBE2C	MCM6	MCM3	PTTG1	CDK1	KIF4A	ESPL1	MAD2L1	NEK2	KIF22	HMMR	KPNA2	CDKN3	CDC25A	H2AFX	CDC25B	PLK4	CDC6	CCNF	MCM5	LMNB1	E2F3	KIF15
HALLMARK_REACTIVE_OXIGEN_SPECIES_PATHWAY	Reactive oxigen oxigen species pathway	MSigDB	GSR	PRDX2	TXNRD1	SOD1	GCLC	CAT	GPX4	MPO	PRDX1	PRDX6	GCLM	TXN	SOD2	PRDX4	SELS	PDLIM1	TXNRD2	HBXIP	G6PD	MSRA	MBP	SRXN1	NQO1	OXSR1	GLRX2	HMOX2	FES	PFKP	NDUFB4	GPX3	SCAF4	CDKN2D	MGST1	ABCC1	FTL	ATOX1	STK25	EGLN2	ERCC2	SBNO2	JUNB	PPP2R4	LSP1	NDUFA6	HHEX	GLRX	NDUFS2
HALLMARK_APICAL_SURFACE	Apical surface	MSigDB	B4GALT1	RHCG	MAL	LYPD3	PKHD1	ATP6V0A4	AIM1	SHROOM2	SRPX	MDGA1	TMEM8B	THY1	PCSK9	EPHB4	DCBLD2	GHRL	LYN	GAS1	FLOT2	PLAUR	AKAP7	ATP8B1	EFNA5	SLC34A3	APP	GSTM3	HSPB1	SLC2A4	IL2RB	RTN4RL1	NCOA6	SULF2	ADAM10	BRCA1	GATA3	AFAP1L2	IL2RG	CD160	ADIPOR2	SLC22A12	NTNG1	SCUBE1	CX3CL1	CROCC
HALLMARK_FATTY_ACID_METABOLISM	Fatty acid metabolism	MSigDB	ACAA1	ACAA2	ACADL	ACADM	ACOT8	ACOX1	ACSL1	ALDH3A2	CCDC58	CPT2	CYP4A11	DECR1	ECH1	ECI1	ELOVL5	FABP1	FABP2	HADH	HIBCH	HMGCL	HSD17B11	IDH1	ME1	MGLL	MLYCD	PCBD1	RETSAT	S100A10	SUCLG1	VNN1	EHHADH	ALDH9A1	HADHB	ECHS1	ACADS	CA2	HSD17B10	ALDH1A1	ACADVL	HSD17B4	CA4	ADH1C	ADH7	PTS	MAOA	HAO2	HSD17B7
KEGG_FOCAL_ADHESION	Focal adhesion	MSigDB	JUN	LOC100418883	ELK1	HGF	PARVA	FN1	TNN	IGF1	BIRC3	XIAP	COMP	THBS4	IGF1R	DIAPH1	ITGA11	PGF	PARVG	ROCK1	PTK2	MYL7	FLT1	FLT4	AKT1	RELN	AKT2	LAMC2	MYL12A	LAMB2	LAMB3	LAMC1	LAMA4	LAMA5	LAMB1	PAK6	PIK3R5	CAPN2	LAMB4	FLNC	FLNA	FLNB	MYL2	MYLK	MYL5	PIP5K1C	MET	MYL10	BIRC2
HALLMARK_APICAL_JUNCTION	Apical junction	MSigDB	ACTN1	CLDN7	ACTN3	CLDN19	DLG1	TJP1	COL17A1	PVRL1	CLDN9	CDH3	CTNND1	CDH1	LIMA1	VCL	SHROOM2	PVRL3	PVRL2	CLDN14	PTPRC	THY1	VASP	ITGB1	ZYX	ACTN4	CLDN4	CADM3	ITGA3	NF2	B4GALT1	NEXN	CDH6	ADAM15	PTK2	HADH	LAMB3	CLDN11	CDH4	IRS1	SORBS3	CLDN8	EVL	CLDN15	THBS3	PVRL4	JAM3	CDH11	ITGB4
HALLMARK_INTERFERON_ALPHA_RESPONSE	Interferon alpha response	MSigDB	MX1	ISG15	OAS1	IFIT3	IFI44	IFI35	IRF7	RSAD2	IFI44L	IFITM1	IFI27	IRF9	OASL	EIF2AK2	IFIT2	CXCL10	TAP1	SP110	DDX60	UBE2L6	USP18	PSMB8	IFIH1	BST2	LGALS3BP	ADAR	ISG20	GBP2	IRF1	PLSCR1	PSMB9	HERC6	SAMD9	CMPK2	IFITM3	RTP4	STAT2	SAMD9L	LY6E	IFITM2	PRIC285	CXCL11	TRIM21	PARP14	TRIM26	PARP12	NMI
HALLMARK_COAGULATION	Coagulation	MSigDB	F2	PROC	C1S	MMP14	F10	PLG	C1R	SERPINE1	SERPING1	C2	F12	CFI	MMP2	C3	F9	CTSO	TMPRSS6	MMP9	PROZ	MMP1	CFB	BMP1	VWF	FGA	F11	THBD	FURIN	MMP11	F8	LGMN	HPN	CTSB	MBL2	F13B	TIMP1	CTSL2	MMP8	A2M	MMP10	MASP2	FGG	C8A	PLAU	ADAM9	GSN	CAPN2	PLAT
REACTOME_METABOLISM_OF_AMINO_ACIDS_AND_DERIVATIVES	Metabolism of amino acids and derivatives	MSigDB	AASS	SLC25A15	PSMD14	CDO1	CGA	CGB	FTCD	HIBADH	ADC	CKB	CKM	CKMT1B	CKMT2	TPH2	AFMID	ACMSD	UROC1	CPS1	PSMA8	AMDHD1	SLC25A10	CTH	AANAT	DAO	DBH	NAGS	DBT	DDC	IDO2	NQO1	DIO1	DIO2	DIO3	DLD	DLST	AGXT	AHCY	PAOX	FAH	ALDH9A1	PSME4	ETHE1	HAAO	FSHB	GAMT	AMD1	PHGDH
KEGG_MISMATCH_REPAIR	Mismatch repair	MSigDB	MLH3	POLD1	MLH1	POLD2	RFC1	MSH2	RFC3	RFC2	MSH3	POLD4	PMS2	RFC4	LIG1	RFC5	RPA1	MSH6	RPA3	POLD3	RPA2	PCNA	SSBP1	RPA4	EXO1
KEGG_TGF_BETA_SIGNALING_PATHWAY	TGFβ signaling pathway	MSigDB	TFDP1	NOG	TNF	GDF7	INHBB	INHBC	COMP	INHBA	THBS4	RHOA	CREBBP	ROCK1	ID1	ID2	RPS6KB1	RPS6KB2	CUL1	LOC728622	ID4	SMAD3	MAPK3	RBL2	SMAD4	RBL1	NODAL	SMAD1	MYC	SMAD2	MAPK1	SMURF2	SMURF1	EP300	BMP8A	GDF5	SKP1	CHRD	TGFB2	TGFB1	IFNG	CDKN2B	PPP2CB	PPP2CA	PPP2R1A	ID3	SMAD5	RBX1	FST
REACTOME_EXTRINSIC_PATHWAY_FOR_APOPTOSIS	Extrinsic pathway for apoptosis	MSigDB	FAS	FASLG	TNF	TNFRSF1A	TRAF2	CASP8	CASP10	TRADD	RIPK1	TNFSF10	FADD	TNFRSF10B	CFLAR
HALLMARK_TNFA_SIGNALING_VIA_NFKB	TNFα signaling via NFκβ	MSigDB	JUNB	CXCL2	ATF3	NFKBIA	TNFAIP3	PTGS2	CXCL1	IER3	CD83	CCL20	CXCL3	MAFF	NFKB2	TNFAIP2	HBEGF	KLF6	BIRC3	PLAUR	ZFP36	ICAM1	JUN	EGR3	IL1B	BCL2A1	PPP1R15A	ZC3H12A	SOD2	NR4A2	IL1A	RELB	TRAF1	BTG2	DUSP1	MAP3K8	ETS2	F3	SDC4	EGR1	IL6	TNF	KDM6B	NFKB1	LIF	PTX3	FOSL1	NR4A1	JAG1
[truncated: 206 more columns]
