# Supplementary material for: A Pan-cancer Landscape of Interactions between Solid Tumors and Infiltrating Immune Cell Populations
Source: Oxford University Press journal article supplement (doi:10.1158/1078-0432.ccr-17-3509), 2018-04-17
Supplement: 10780432ccr173509-sup-192911_3_supp_4675338_p6rxmz.xlsx [file 10780432ccr173509-sup-192911_3_supp_4675338_p6rxmz.xlsx]

## Sheet: cancer immune-phenotypes
Patient TCGA ID	Cancer type	Immune-phenotype
TCGA-OR-A5KZ	ACC	3
TCGA-OR-A5J1	ACC	3
TCGA-OR-A5JL	ACC	3
TCGA-OU-A5PI	ACC	3
TCGA-OR-A5KX	ACC	3
TCGA-OR-A5JW	ACC	3
TCGA-P6-A5OF	ACC	3
TCGA-OR-A5KU	ACC	3
TCGA-OR-A5JG	ACC	3
TCGA-OR-A5KW	ACC	3
TCGA-OR-A5LS	ACC	3
TCGA-OR-A5JE	ACC	3
TCGA-OR-A5K2	ACC	3
TCGA-OR-A5K5	ACC	3
TCGA-OR-A5JP	ACC	3
TCGA-OR-A5LC	ACC	3
TCGA-OR-A5K4	ACC	3
TCGA-OR-A5JT	ACC	3
TCGA-OR-A5LR	ACC	3
TCGA-OR-A5LO	ACC	2
TCGA-OR-A5JS	ACC	2
TCGA-OR-A5L8	ACC	2
TCGA-PK-A5H8	ACC	2
TCGA-OR-A5JF	ACC	2
TCGA-OR-A5KO	ACC	2
TCGA-OR-A5LB	ACC	2
TCGA-OR-A5J3	ACC	2
TCGA-OR-A5JA	ACC	2
TCGA-OR-A5J2	ACC	1
TCGA-OR-A5JY	ACC	1
TCGA-OR-A5LM	ACC	1
TCGA-OR-A5LT	ACC	1
TCGA-OR-A5JM	ACC	1
TCGA-OR-A5J7	ACC	1
TCGA-PK-A5HB	ACC	1
TCGA-OR-A5K6	ACC	1
TCGA-OR-A5K9	ACC	1
TCGA-OR-A5KY	ACC	1
TCGA-OR-A5L3	ACC	1
TCGA-OR-A5LD	ACC	1
TCGA-OR-A5K0	ACC	1
TCGA-OR-A5LE	ACC	1
TCGA-OR-A5JJ	ACC	4
TCGA-OR-A5J5	ACC	4
TCGA-OR-A5J9	ACC	4
TCGA-OR-A5KV	ACC	4
TCGA-PK-A5H9	ACC	4
TCGA-OR-A5LL	ACC	4
TCGA-OR-A5JX	ACC	4
TCGA-OR-A5LG	ACC	4
TCGA-OR-A5LJ	ACC	4
TCGA-OR-A5JC	ACC	4
TCGA-OR-A5JZ	ACC	4
TCGA-OR-A5K3	ACC	4
TCGA-OR-A5L4	ACC	4
TCGA-OR-A5JO	ACC	6
TCGA-OR-A5LK	ACC	6
TCGA-OR-A5L5	ACC	6
TCGA-OR-A5L9	ACC	6
TCGA-OR-A5LA	ACC	6
TCGA-OR-A5LN	ACC	6
TCGA-OR-A5J8	ACC	6
TCGA-OR-A5KT	ACC	6
TCGA-OR-A5JB	ACC	6
TCGA-OR-A5JK	ACC	6
TCGA-OR-A5K8	ACC	5
TCGA-OR-A5K1	ACC	5
TCGA-OR-A5L6	ACC	5
TCGA-OR-A5JR	ACC	5
TCGA-OR-A5LH	ACC	5
TCGA-OR-A5J6	ACC	5
TCGA-OR-A5JD	ACC	5
TCGA-OR-A5JI	ACC	5
TCGA-OR-A5JQ	ACC	5
TCGA-OR-A5JV	ACC	5
TCGA-PK-A5HA	ACC	5
TCGA-OR-A5LP	ACC	5
TCGA-PA-A5YG	ACC	5
TCGA-DK-A3IN	BLCA	3
TCGA-UY-A8OC	BLCA	3
TCGA-DK-A2I2	BLCA	3
TCGA-E7-A7DV	BLCA	3
TCGA-PQ-A6FN	BLCA	3
TCGA-XF-A9SZ	BLCA	3
TCGA-DK-A3IT	BLCA	3
TCGA-DK-AA6X	BLCA	3
TCGA-DK-AA6L	BLCA	3
TCGA-DK-A1A5	BLCA	3
TCGA-FD-A5C0	BLCA	3
TCGA-XF-AAMR	BLCA	3
TCGA-GC-A3OO	BLCA	3
TCGA-XF-AAMY	BLCA	3
TCGA-XF-AAN3	BLCA	3
TCGA-4Z-AA82	BLCA	3
TCGA-FD-A5BY	BLCA	3
TCGA-DK-A2HX	BLCA	3
TCGA-XF-AAMT	BLCA	3
TCGA-G2-A2EJ	BLCA	3
TCGA-FD-A3N5	BLCA	3
TCGA-XF-A9T4	BLCA	3
TCGA-CF-A1HS	BLCA	3
TCGA-CU-A3KJ	BLCA	3
TCGA-BT-A3PK	BLCA	3
TCGA-GV-A40E	BLCA	3
TCGA-HQ-A5NE	BLCA	3
TCGA-XF-AAMW	BLCA	3
TCGA-XF-A9T6	BLCA	3
TCGA-C4-A0F0	BLCA	3
TCGA-K4-A4AC	BLCA	3
TCGA-2F-A9KW	BLCA	3
TCGA-GD-A3OS	BLCA	3
TCGA-BT-A2LD	BLCA	3
TCGA-FD-A6TH	BLCA	3
TCGA-XF-AAN7	BLCA	3
TCGA-C4-A0F1	BLCA	3
TCGA-FD-A43N	BLCA	3
TCGA-FD-A6TI	BLCA	3
TCGA-XF-A9SV	BLCA	3
TCGA-K4-A4AB	BLCA	3
TCGA-K4-A5RI	BLCA	3
TCGA-FD-A6TF	BLCA	3
TCGA-DK-A3IQ	BLCA	3
TCGA-FD-A5BZ	BLCA	3
TCGA-FD-A5BR	BLCA	3
TCGA-UY-A8OD	BLCA	3
TCGA-XF-A9SP	BLCA	3
TCGA-G2-A2EC	BLCA	3
TCGA-ZF-A9R9	BLCA	3
TCGA-K4-AAQO	BLCA	3
TCGA-SY-A9G0	BLCA	3
TCGA-K4-A6FZ	BLCA	3
TCGA-UY-A9PF	BLCA	3
TCGA-ZF-AA56	BLCA	3
TCGA-BT-A20R	BLCA	3
TCGA-FD-A3SQ	BLCA	3
TCGA-FD-A62S	BLCA	3
TCGA-FD-A5BU	BLCA	3
TCGA-XF-A9SK	BLCA	3
TCGA-BT-A3PJ	BLCA	3
TCGA-FD-A3SO	BLCA	3
TCGA-CU-A0YN	BLCA	3
TCGA-GC-A3YS	BLCA	3
TCGA-G2-A2ES	BLCA	3
TCGA-ZF-AA54	BLCA	3
TCGA-FD-A3SN	BLCA	3
TCGA-YC-A89H	BLCA	3
TCGA-GU-AATP	BLCA	3
TCGA-FD-A43Y	BLCA	3
TCGA-UY-A8OB	BLCA	3
TCGA-DK-A6B0	BLCA	2
TCGA-CF-A47Y	BLCA	2
TCGA-E7-A3Y1	BLCA	2
TCGA-E7-A6MF	BLCA	2
TCGA-CF-A3MF	BLCA	2
TCGA-LT-A5Z6	BLCA	2
TCGA-YC-A9TC	BLCA	2
TCGA-UY-A78O	BLCA	2
TCGA-CF-A47W	BLCA	2
TCGA-E7-A7DU	BLCA	2
TCGA-GU-A767	BLCA	2
TCGA-E5-A4U1	BLCA	2
TCGA-KQ-A41R	BLCA	2
TCGA-MV-A51V	BLCA	2
TCGA-G2-AA3F	BLCA	2
TCGA-ZF-A9R0	BLCA	2
TCGA-CF-A8HX	BLCA	2
TCGA-E7-A4XJ	BLCA	2
TCGA-CF-A47T	BLCA	2
TCGA-DK-A1AG	BLCA	2
TCGA-E7-A8O8	BLCA	2
TCGA-CF-A5U8	BLCA	2
TCGA-CF-A3MG	BLCA	2
TCGA-DK-AA75	BLCA	2
TCGA-4Z-AA89	BLCA	2
TCGA-BT-A20P	BLCA	2
TCGA-UY-A78M	BLCA	2
TCGA-YF-AA3L	BLCA	2
TCGA-KQ-A41P	BLCA	2
TCGA-XF-A8HF	BLCA	2
TCGA-CU-A3QU	BLCA	2
TCGA-XF-A8HB	BLCA	2
TCGA-4Z-AA80	BLCA	2
TCGA-E5-A2PC	BLCA	2
TCGA-E7-A85H	BLCA	2
TCGA-XF-AAMZ	BLCA	2
TCGA-FT-A3EE	BLCA	1
TCGA-K4-A6MB	BLCA	1
TCGA-FD-A3SM	BLCA	1
TCGA-FD-A6TC	BLCA	1
TCGA-2F-A9KT	BLCA	1
TCGA-XF-A9ST	BLCA	1
TCGA-FD-A5BV	BLCA	1
TCGA-XF-AAMX	BLCA	1
TCGA-BT-A20N	BLCA	1
TCGA-GU-AATQ	BLCA	1
TCGA-ZF-AA5N	BLCA	1
TCGA-BT-A3PH	BLCA	1
TCGA-YF-AA3M	BLCA	1
TCGA-ZF-A9RC	BLCA	1
TCGA-E7-A677	BLCA	1
TCGA-2F-A9KQ	BLCA	1
TCGA-FD-A62O	BLCA	1
TCGA-XF-A9T2	BLCA	1
TCGA-C4-A0EZ	BLCA	1
TCGA-DK-AA6W	BLCA	1
TCGA-2F-A9KR	BLCA	1
TCGA-FJ-A3ZF	BLCA	1
TCGA-G2-A3VY	BLCA	1
TCGA-E7-A7PW	BLCA	1
TCGA-KQ-A41Q	BLCA	1
TCGA-DK-A6B1	BLCA	1
TCGA-S5-AA26	BLCA	1
TCGA-KQ-A41N	BLCA	1
TCGA-FD-A43X	BLCA	1
TCGA-GV-A3JW	BLCA	1
TCGA-DK-A3IS	BLCA	1
TCGA-DK-AA71	BLCA	1
TCGA-4Z-AA7M	BLCA	1
TCGA-GV-A40G	BLCA	1
TCGA-XF-A8HI	BLCA	1
TCGA-CF-A27C	BLCA	1
TCGA-E7-A5KF	BLCA	1
TCGA-G2-AA3D	BLCA	1
TCGA-DK-AA6P	BLCA	1
TCGA-FJ-A3Z9	BLCA	1
TCGA-CF-A9FL	BLCA	1
TCGA-DK-A1AA	BLCA	1
TCGA-GV-A3QF	BLCA	1
TCGA-ZF-A9R2	BLCA	1
TCGA-CF-A3MH	BLCA	1
TCGA-CF-A47X	BLCA	1
TCGA-4Z-AA7S	BLCA	1
TCGA-ZF-A9R1	BLCA	1
TCGA-ZF-A9RL	BLCA	1
TCGA-BT-A2LA	BLCA	1
TCGA-GU-A42P	BLCA	1
TCGA-XF-A8HC	BLCA	1
TCGA-4Z-AA7R	BLCA	1
TCGA-KQ-A41O	BLCA	1
TCGA-UY-A78N	BLCA	1
TCGA-GC-A3RD	BLCA	1
TCGA-DK-AA76	BLCA	1
TCGA-DK-A3IM	BLCA	1
TCGA-XF-A8HG	BLCA	1
TCGA-E7-A5KE	BLCA	1
TCGA-ZF-AA4U	BLCA	1
TCGA-GU-A42R	BLCA	1
TCGA-BT-A42C	BLCA	1
TCGA-FJ-A3ZE	BLCA	1
TCGA-E5-A4TZ	BLCA	1
TCGA-2F-A9KP	BLCA	1
TCGA-DK-AA6U	BLCA	1
TCGA-H4-A2HQ	BLCA	1
TCGA-CF-A9FH	BLCA	1
TCGA-GV-A3QH	BLCA	1
TCGA-DK-A1AD	BLCA	1
TCGA-GC-A3RB	BLCA	1
TCGA-XF-AAN1	BLCA	1
TCGA-CF-A3MI	BLCA	1
TCGA-E7-A8O7	BLCA	1
TCGA-ZF-A9R3	BLCA	1
TCGA-ZF-A9R5	BLCA	1
TCGA-ZF-AA4X	BLCA	1
TCGA-ZF-A9RM	BLCA	1
TCGA-ZF-AA4T	BLCA	1
TCGA-XF-A8HH	BLCA	1
TCGA-XF-AAMG	BLCA	1
TCGA-DK-A3IL	BLCA	1
TCGA-UY-A9PE	BLCA	1
TCGA-DK-A3IK	BLCA	1
TCGA-FD-A3SJ	BLCA	1
TCGA-G2-A2EK	BLCA	1
TCGA-BT-A0S7	BLCA	1
TCGA-GU-A42Q	BLCA	1
TCGA-GV-A3QI	BLCA	1
TCGA-ZF-A9RE	BLCA	1
TCGA-DK-A3X2	BLCA	1
TCGA-G2-A2EL	BLCA	1
TCGA-CU-A5W6	BLCA	1
TCGA-GC-A3BM	BLCA	1
TCGA-HQ-A2OE	BLCA	1
TCGA-FD-A3SS	BLCA	1
TCGA-K4-A3WV	BLCA	1
TCGA-UY-A9PD	BLCA	1
TCGA-ZF-AA4R	BLCA	1
TCGA-G2-A3IB	BLCA	1
TCGA-C4-A0F7	BLCA	1
TCGA-HQ-A5ND	BLCA	1
TCGA-DK-A1AE	BLCA	1
TCGA-BL-A3JM	BLCA	1
TCGA-GC-A4ZW	BLCA	1
TCGA-GD-A3OQ	BLCA	1
TCGA-BL-A13J	BLCA	1
TCGA-BT-A20U	BLCA	1
TCGA-XF-A9SH	BLCA	1
TCGA-4Z-AA7Y	BLCA	1
TCGA-GD-A2C5	BLCA	1
TCGA-DK-A2I6	BLCA	1
TCGA-C4-A0F6	BLCA	1
TCGA-UY-A78L	BLCA	1
TCGA-GV-A3JZ	BLCA	1
TCGA-4Z-AA84	BLCA	1
TCGA-FJ-A871	BLCA	1
TCGA-CU-A72E	BLCA	1
TCGA-FD-A3B5	BLCA	1
TCGA-DK-A2I4	BLCA	6
TCGA-BT-A20O	BLCA	6
TCGA-DK-A3IU	BLCA	6
TCGA-GV-A3QG	BLCA	6
TCGA-DK-A1AF	BLCA	6
TCGA-FD-A3B8	BLCA	6
TCGA-DK-AA74	BLCA	6
TCGA-FD-A5BT	BLCA	6
TCGA-FD-A5BS	BLCA	6
TCGA-FD-A62N	BLCA	6
TCGA-FD-A43S	BLCA	6
TCGA-FD-A43U	BLCA	6
TCGA-SY-A9G5	BLCA	6
TCGA-XF-A9SI	BLCA	6
TCGA-DK-A3WY	BLCA	6
TCGA-FD-A6TB	BLCA	6
TCGA-XF-AAN4	BLCA	6
TCGA-XF-AAN5	BLCA	6
TCGA-FD-A3B3	BLCA	6
TCGA-LC-A66R	BLCA	6
TCGA-4Z-AA7N	BLCA	6
TCGA-K4-A83P	BLCA	6
TCGA-XF-AAN8	BLCA	6
TCGA-XF-A9SL	BLCA	6
TCGA-XF-AAME	BLCA	6
TCGA-DK-A6B6	BLCA	6
TCGA-DK-AA6Q	BLCA	6
TCGA-4Z-AA81	BLCA	6
TCGA-E7-A4IJ	BLCA	6
TCGA-FD-A43P	BLCA	6
TCGA-UY-A78K	BLCA	6
TCGA-ZF-A9R7	BLCA	6
TCGA-UY-A9PH	BLCA	6
TCGA-XF-A8HD	BLCA	6
TCGA-XF-AAMQ	BLCA	6
TCGA-2F-A9KO	BLCA	6
TCGA-GD-A76B	BLCA	6
TCGA-UY-A9PA	BLCA	6
TCGA-E7-A519	BLCA	6
TCGA-E7-A541	BLCA	6
TCGA-G2-A2EF	BLCA	6
TCGA-XF-AAN2	BLCA	6
TCGA-4Z-AA7Q	BLCA	6
TCGA-BT-A42E	BLCA	6
TCGA-E7-A7XN	BLCA	6
TCGA-DK-A3WX	BLCA	6
TCGA-XF-A8HE	BLCA	6
TCGA-DK-A1AC	BLCA	6
TCGA-ZF-A9RN	BLCA	6
TCGA-GU-A766	BLCA	6
TCGA-DK-A3WW	BLCA	6
TCGA-E7-A97P	BLCA	6
TCGA-4Z-AA7W	BLCA	6
TCGA-GC-A6I1	BLCA	6
TCGA-K4-A5RJ	BLCA	6
TCGA-GU-A762	BLCA	6
TCGA-XF-A9SM	BLCA	6
TCGA-FD-A5BX	BLCA	6
TCGA-S5-A6DX	BLCA	6
TCGA-BT-A2LB	BLCA	6
TCGA-FT-A61P	BLCA	6
TCGA-GC-A6I3	BLCA	6
TCGA-G2-A2EO	BLCA	6
TCGA-ZF-A9RF	BLCA	6
TCGA-UY-A78P	BLCA	6
TCGA-FD-A5C1	BLCA	6
TCGA-XF-A9SX	BLCA	6
TCGA-ZF-A9RD	BLCA	6
TCGA-K4-A54R	BLCA	6
TCGA-XF-A9T5	BLCA	6
TCGA-4Z-AA86	BLCA	6
TCGA-XF-A9T8	BLCA	6
TCGA-GU-A764	BLCA	6
TCGA-BT-A42F	BLCA	6
TCGA-UY-A9PB	BLCA	6
TCGA-FD-A3B6	BLCA	6
TCGA-K4-A5RH	BLCA	6
TCGA-XF-A9SY	BLCA	6
TCGA-ZF-AA58	BLCA	6
TCGA-DK-A3IV	BLCA	4
TCGA-GV-A3QK	BLCA	4
TCGA-4Z-AA7O	BLCA	4
TCGA-H4-A2HO	BLCA	4
TCGA-GV-A3JV	BLCA	4
TCGA-BT-A20W	BLCA	4
TCGA-E7-A6MD	BLCA	4
TCGA-XF-AAML	BLCA	4
TCGA-G2-AA3B	BLCA	4
TCGA-GV-A6ZA	BLCA	4
TCGA-DK-AA77	BLCA	4
TCGA-ZF-A9R4	BLCA	4
TCGA-E7-A678	BLCA	4
TCGA-FD-A6TE	BLCA	4
TCGA-CF-A1HR	BLCA	4
TCGA-4Z-AA83	BLCA	4
TCGA-CF-A47V	BLCA	4
TCGA-E7-A6ME	BLCA	4
TCGA-BT-A20V	BLCA	4
TCGA-PQ-A6FI	BLCA	4
TCGA-ZF-AA4W	BLCA	4
TCGA-DK-A3X1	BLCA	4
TCGA-GD-A6C6	BLCA	4
TCGA-XF-A9T0	BLCA	4
TCGA-4Z-AA87	BLCA	4
TCGA-DK-A6AV	BLCA	4
TCGA-DK-A1A7	BLCA	4
TCGA-CF-A8HY	BLCA	4
TCGA-XF-AAMH	BLCA	4
TCGA-E7-A97Q	BLCA	4
TCGA-CF-A7I0	BLCA	4
TCGA-CU-A3YL	BLCA	4
TCGA-CF-A5UA	BLCA	4
TCGA-CF-A47S	BLCA	4
TCGA-G2-A3IE	BLCA	4
TCGA-GU-A763	BLCA	4
TCGA-LT-A8JT	BLCA	4
TCGA-BL-A5ZZ	BLCA	5
TCGA-ZF-AA52	BLCA	5
TCGA-XF-A9SU	BLCA	5
TCGA-FD-A3SL	BLCA	5
TCGA-DK-AA6S	BLCA	5
TCGA-FD-A6TG	BLCA	5
TCGA-ZF-AA4N	BLCA	5
TCGA-5N-A9KM	BLCA	5
TCGA-KQ-A41S	BLCA	5
TCGA-K4-A3WU	BLCA	5
TCGA-FJ-A3Z7	BLCA	5
TCGA-XF-AAN0	BLCA	5
TCGA-GD-A3OP	BLCA	5
TCGA-CF-A9FF	BLCA	5
TCGA-DK-A6AW	BLCA	5
TCGA-DK-A6B5	BLCA	5
TCGA-GV-A3JX	BLCA	5
TCGA-5N-A9KI	BLCA	5
TCGA-ZF-AA51	BLCA	5
TCGA-GC-A3I6	BLCA	5
TCGA-GC-A3RC	BLCA	5
TCGA-ZF-AA5H	BLCA	5
TCGA-G2-AA3C	BLCA	5
TCGA-CU-A0YR	BLCA	5
TCGA-FD-A3NA	BLCA	5
TCGA-BT-A20T	BLCA	5
TCGA-ZF-AA4V	BLCA	5
TCGA-DK-A1A6	BLCA	5
TCGA-DK-AA6R	BLCA	5
TCGA-E7-A3X6	BLCA	5
TCGA-DK-AA6T	BLCA	5
TCGA-BT-A20X	BLCA	5
TCGA-FD-A3N6	BLCA	5
TCGA-BT-A0YX	BLCA	5
TCGA-BT-A20J	BLCA	5
TCGA-FD-A6TK	BLCA	5
TCGA-FD-A3B7	BLCA	5
TCGA-FD-A3SP	BLCA	5
TCGA-BL-A13I	BLCA	5
TCGA-FD-A62P	BLCA	5
TCGA-DK-AA6M	BLCA	5
TCGA-ZF-AA53	BLCA	5
TCGA-FD-A6TD	BLCA	5
TCGA-XF-A9SJ	BLCA	5
TCGA-GU-AATO	BLCA	5
TCGA-DK-A1A3	BLCA	5
TCGA-DK-A2I1	BLCA	5
TCGA-BT-A20Q	BLCA	5
TCGA-K4-A3WS	BLCA	5
TCGA-CU-A0YO	BLCA	5
TCGA-GC-A3WC	BLCA	5
TCGA-DK-A1AB	BLCA	5
TCGA-XF-A9SW	BLCA	5
TCGA-XF-A9T3	BLCA	5
TCGA-XF-AAMJ	BLCA	5
TCGA-FD-A3B4	BLCA	5
TCGA-FD-A3SR	BLCA	5
TCGA-ZF-AA5P	BLCA	5
TCGA-YC-A8S6	BLCA	5
TCGA-FD-A6TA	BLCA	5
TCGA-R3-A69X	BLCA	5
TCGA-AN-A0AJ	BRCA	6
TCGA-C8-A1HF	BRCA	6
TCGA-A8-A09M	BRCA	6
TCGA-C8-A1HG	BRCA	6
TCGA-D8-A1XL	BRCA	6
TCGA-BH-A0BZ	BRCA	6
TCGA-E9-A1NC	BRCA	6
TCGA-LL-A7SZ	BRCA	6
TCGA-D8-A1JK	BRCA	6
TCGA-E9-A1ND	BRCA	6
TCGA-AR-A0U0	BRCA	6
TCGA-A2-A0SW	BRCA	6
TCGA-PL-A8LZ	BRCA	6
TCGA-AR-A1AO	BRCA	6
TCGA-D8-A1Y2	BRCA	6
TCGA-A2-A0T1	BRCA	6
TCGA-LD-A9QF	BRCA	6
TCGA-A8-A0A7	BRCA	6
TCGA-BH-A0AW	BRCA	6
TCGA-C8-A12K	BRCA	6
TCGA-AR-A1AT	BRCA	6
TCGA-E9-A3QA	BRCA	6
TCGA-C8-A275	BRCA	6
TCGA-A8-A07U	BRCA	6
TCGA-E9-A243	BRCA	6
TCGA-BH-A0DK	BRCA	6
TCGA-AN-A0XW	BRCA	6
TCGA-BH-A0C0	BRCA	6
TCGA-AC-A3OD	BRCA	6
TCGA-AR-A0TX	BRCA	6
TCGA-AR-A24U	BRCA	6
TCGA-OL-A5RY	BRCA	6
TCGA-AR-A1AJ	BRCA	6
TCGA-BH-A1F0	BRCA	6
TCGA-BH-A18I	BRCA	6
TCGA-E2-A14Z	BRCA	6
TCGA-BH-A0B7	BRCA	6
TCGA-BH-A0W7	BRCA	6
TCGA-C8-A138	BRCA	6
TCGA-A2-A04X	BRCA	6
TCGA-EW-A2FV	BRCA	6
TCGA-AR-A0TQ	BRCA	6
TCGA-AO-A03M	BRCA	6
TCGA-EW-A1IY	BRCA	6
TCGA-BH-A209	BRCA	6
TCGA-E9-A248	BRCA	6
TCGA-C8-A132	BRCA	6
TCGA-C8-A1HM	BRCA	6
TCGA-E2-A15M	BRCA	6
TCGA-AO-A12D	BRCA	6
TCGA-AR-A0TT	BRCA	6
TCGA-E9-A22D	BRCA	6
TCGA-GM-A2DN	BRCA	6
TCGA-A8-A0A6	BRCA	6
TCGA-E2-A1II	BRCA	6
TCGA-A8-A08I	BRCA	6
TCGA-A8-A096	BRCA	6
TCGA-A8-A08P	BRCA	6
TCGA-AN-A046	BRCA	6
TCGA-E9-A227	BRCA	6
TCGA-A2-A0EQ	BRCA	6
TCGA-EW-A1IZ	BRCA	6
TCGA-PE-A5DE	BRCA	6
TCGA-A2-A0CR	BRCA	6
TCGA-E9-A5FK	BRCA	6
TCGA-E2-A1B5	BRCA	6
TCGA-AO-A0JC	BRCA	6
TCGA-GM-A2DO	BRCA	6
TCGA-B6-A0RT	BRCA	6
TCGA-E9-A2JT	BRCA	6
TCGA-S3-AA17	BRCA	6
TCGA-AR-A1AW	BRCA	6
TCGA-BH-A0H5	BRCA	6
TCGA-E9-A1NE	BRCA	6
TCGA-A2-A0CL	BRCA	6
TCGA-AR-A252	BRCA	6
TCGA-AC-A6IV	BRCA	6
TCGA-D8-A27T	BRCA	6
TCGA-GM-A4E0	BRCA	6
TCGA-AC-A3W5	BRCA	6
TCGA-XX-A89A	BRCA	6
TCGA-BH-A0BF	BRCA	6
TCGA-A2-A25D	BRCA	6
TCGA-BH-A2L8	BRCA	6
TCGA-AC-A3W6	BRCA	6
TCGA-GM-A2DA	BRCA	6
TCGA-AC-A2FE	BRCA	6
TCGA-AC-A3BB	BRCA	6
TCGA-A7-A3J1	BRCA	6
TCGA-AQ-A7U7	BRCA	6
TCGA-AR-A1AK	BRCA	6
TCGA-A2-A0CO	BRCA	6
TCGA-EW-A3E8	BRCA	6
TCGA-A2-A0EN	BRCA	6
TCGA-A2-A25F	BRCA	6
TCGA-D8-A141	BRCA	6
TCGA-D8-A73U	BRCA	6
TCGA-AN-A0FN	BRCA	6
TCGA-A2-A0EP	BRCA	6
TCGA-E2-A108	BRCA	6
TCGA-AC-A2FO	BRCA	6
TCGA-A2-A0YK	BRCA	6
TCGA-BH-A1FB	BRCA	6
TCGA-E2-A3DX	BRCA	6
TCGA-XX-A899	BRCA	6
TCGA-BH-A0W5	BRCA	6
TCGA-BH-A1FE	BRCA	6
TCGA-D8-A1JB	BRCA	6
TCGA-AC-A2FB	BRCA	6
TCGA-AR-A1AX	BRCA	6
TCGA-BH-A18H	BRCA	6
TCGA-E9-A1QZ	BRCA	6
TCGA-A2-A3XZ	BRCA	5
TCGA-5L-AAT0	BRCA	5
TCGA-OK-A5Q2	BRCA	5
TCGA-LL-A5YN	BRCA	5
TCGA-WT-AB41	BRCA	5
TCGA-B6-A0WS	BRCA	5
TCGA-LD-A7W5	BRCA	5
TCGA-AR-A0TW	BRCA	5
TCGA-C8-A8HP	BRCA	5
TCGA-A2-A4S2	BRCA	5
TCGA-C8-A8HR	BRCA	5
TCGA-3C-AALI	BRCA	5
TCGA-AO-A03R	BRCA	5
TCGA-B6-A0I2	BRCA	5
TCGA-A1-A0SF	BRCA	5
TCGA-AO-A0JG	BRCA	5
TCGA-E2-A1IK	BRCA	5
TCGA-C8-A12U	BRCA	5
TCGA-A8-A09Z	BRCA	5
TCGA-AO-A1KQ	BRCA	5
TCGA-B6-A0IH	BRCA	5
TCGA-BH-A42V	BRCA	5
TCGA-AR-A2LO	BRCA	5
TCGA-OL-A5RU	BRCA	5
TCGA-A2-A25A	BRCA	5
TCGA-A2-A04Y	BRCA	5
TCGA-D8-A140	BRCA	5
TCGA-AR-A0U2	BRCA	5
TCGA-A8-A081	BRCA	5
TCGA-A8-A09G	BRCA	5
TCGA-A7-A4SA	BRCA	5
TCGA-E2-A1IO	BRCA	5
TCGA-BH-A0C1	BRCA	5
TCGA-BH-A0DT	BRCA	5
TCGA-E2-A15K	BRCA	5
TCGA-A8-A0A1	BRCA	5
TCGA-A2-A0YI	BRCA	5
TCGA-A7-A0CG	BRCA	5
TCGA-AC-A2FF	BRCA	5
TCGA-A2-A0T6	BRCA	5
TCGA-BH-A1EU	BRCA	5
TCGA-AO-A0JJ	BRCA	5
TCGA-A2-A0SY	BRCA	5
TCGA-E2-A1IH	BRCA	5
TCGA-BH-A8G0	BRCA	5
TCGA-AC-A3HN	BRCA	5
TCGA-AC-A23G	BRCA	5
TCGA-BH-A0DV	BRCA	5
TCGA-A2-A0EO	BRCA	5
TCGA-A8-A09Q	BRCA	5
TCGA-D8-A27G	BRCA	5
TCGA-A2-A0YD	BRCA	5
TCGA-AC-A2B8	BRCA	5
TCGA-D8-A27I	BRCA	5
TCGA-A2-A0EW	BRCA	5
TCGA-BH-A0DP	BRCA	5
TCGA-LL-A440	BRCA	5
TCGA-AO-A0JF	BRCA	5
TCGA-D8-A1JU	BRCA	5
TCGA-AC-A62Y	BRCA	5
TCGA-BH-A0BV	BRCA	5
TCGA-GM-A2DK	BRCA	5
TCGA-A2-A0EV	BRCA	5
TCGA-BH-A0HB	BRCA	5
TCGA-A7-A13H	BRCA	5
TCGA-BH-A0DE	BRCA	5
TCGA-A2-A4S1	BRCA	5
TCGA-OL-A66H	BRCA	5
TCGA-BH-A0BD	BRCA	5
TCGA-E9-A1N5	BRCA	5
TCGA-AC-A2QI	BRCA	5
TCGA-GM-A3XN	BRCA	5
TCGA-BH-A1EY	BRCA	5
TCGA-A1-A0SN	BRCA	5
TCGA-B6-A408	BRCA	5
TCGA-BH-A0BQ	BRCA	5
TCGA-E2-A1IJ	BRCA	5
TCGA-E9-A22A	BRCA	5
TCGA-BH-A0B0	BRCA	5
TCGA-AC-A5XS	BRCA	5
TCGA-BH-A5J0	BRCA	5
TCGA-A2-A0T4	BRCA	5
TCGA-BH-A0AY	BRCA	5
TCGA-A8-A08H	BRCA	5
TCGA-BH-A6R9	BRCA	5
TCGA-BH-A0C3	BRCA	5
TCGA-A2-A0CZ	BRCA	5
TCGA-BH-A0DI	BRCA	5
TCGA-LD-A66U	BRCA	5
TCGA-E9-A3X8	BRCA	5
TCGA-OL-A66L	BRCA	5
TCGA-AN-A0XS	BRCA	5
TCGA-E2-A1LA	BRCA	5
TCGA-E9-A22E	BRCA	5
TCGA-E9-A1RF	BRCA	5
TCGA-JL-A3YW	BRCA	5
TCGA-AO-A0J9	BRCA	5
TCGA-AR-A2LJ	BRCA	5
TCGA-B6-A0IN	BRCA	5
TCGA-Z7-A8R5	BRCA	5
TCGA-LL-A5YL	BRCA	4
TCGA-LL-A5YM	BRCA	4
TCGA-D8-A27R	BRCA	4
TCGA-LL-A50Y	BRCA	4
TCGA-OL-A66N	BRCA	4
TCGA-3C-AALK	BRCA	4
TCGA-AC-A3QQ	BRCA	4
TCGA-LL-A9Q3	BRCA	4
TCGA-A8-A09N	BRCA	4
TCGA-EW-A423	BRCA	4
TCGA-AC-A3TM	BRCA	4
TCGA-AO-A126	BRCA	4
TCGA-BH-A0B4	BRCA	4
TCGA-E2-A10C	BRCA	4
TCGA-A2-A3XW	BRCA	4
TCGA-BH-A0HA	BRCA	4
TCGA-EW-A2FS	BRCA	4
TCGA-PL-A8LY	BRCA	4
TCGA-A8-A06T	BRCA	4
TCGA-EW-A1J6	BRCA	4
TCGA-AO-A03T	BRCA	4
TCGA-AQ-A54O	BRCA	4
TCGA-B6-A0RV	BRCA	4
TCGA-A2-A0CK	BRCA	4
TCGA-3C-AALJ	BRCA	4
TCGA-E9-A3HO	BRCA	4
TCGA-B6-A0RH	BRCA	4
TCGA-BH-A0EE	BRCA	4
TCGA-D8-A1JM	BRCA	4
TCGA-E2-A14Q	BRCA	4
TCGA-D8-A4Z1	BRCA	4
TCGA-E9-A1R0	BRCA	4
TCGA-A7-A426	BRCA	4
TCGA-PE-A5DD	BRCA	4
TCGA-B6-A0RP	BRCA	4
TCGA-A2-A0CV	BRCA	4
TCGA-MS-A51U	BRCA	4
TCGA-D8-A1Y0	BRCA	4
TCGA-EW-A1J5	BRCA	4
TCGA-BH-A18M	BRCA	4
TCGA-A8-A08B	BRCA	4
TCGA-AC-A2BM	BRCA	4
TCGA-AR-A2LN	BRCA	4
TCGA-A2-A4RY	BRCA	4
TCGA-AC-A8OS	BRCA	4
TCGA-BH-A28O	BRCA	4
TCGA-BH-A0BA	BRCA	4
TCGA-OL-A6VQ	BRCA	4
TCGA-AC-A2FK	BRCA	4
TCGA-A2-A0YL	BRCA	4
TCGA-AO-A12A	BRCA	4
TCGA-E9-A3Q9	BRCA	4
TCGA-A2-A0ES	BRCA	4
TCGA-AR-A24O	BRCA	4
TCGA-A1-A0SI	BRCA	4
TCGA-A2-A0YH	BRCA	4
TCGA-AO-A0JE	BRCA	4
TCGA-EW-A1PE	BRCA	4
TCGA-C8-A278	BRCA	4
TCGA-D8-A1J8	BRCA	4
TCGA-AR-A254	BRCA	4
TCGA-E9-A1R4	BRCA	4
TCGA-A8-A075	BRCA	4
TCGA-E2-A1B0	BRCA	4
TCGA-B6-A0RS	BRCA	4
TCGA-A8-A094	BRCA	4
TCGA-BH-A202	BRCA	4
TCGA-A2-A1G1	BRCA	4
TCGA-A8-A08X	BRCA	4
TCGA-B6-A0IJ	BRCA	4
TCGA-E2-A1LE	BRCA	4
TCGA-BH-A0DL	BRCA	4
TCGA-LL-A73Z	BRCA	4
TCGA-BH-A18Q	BRCA	4
TCGA-PL-A8LV	BRCA	4
TCGA-A2-A4RX	BRCA	4
TCGA-A8-A08L	BRCA	4
TCGA-S3-AA0Z	BRCA	4
TCGA-AR-A24Q	BRCA	4
TCGA-C8-A134	BRCA	4
TCGA-AO-A03O	BRCA	4
TCGA-C8-A26W	BRCA	4
TCGA-AN-A0FD	BRCA	4
TCGA-A2-A4S3	BRCA	4
TCGA-E2-A15A	BRCA	4
TCGA-AR-A0TV	BRCA	4
TCGA-C8-A8HQ	BRCA	4
TCGA-AN-A0AM	BRCA	4
TCGA-B6-A0X1	BRCA	4
TCGA-AC-A5EH	BRCA	4
TCGA-AN-A03X	BRCA	4
TCGA-D8-A1Y3	BRCA	4
TCGA-OL-A5S0	BRCA	4
TCGA-A7-A56D	BRCA	4
TCGA-E9-A6HE	BRCA	4
TCGA-C8-A135	BRCA	4
TCGA-A2-A3Y0	BRCA	4
TCGA-LL-A8F5	BRCA	4
TCGA-AC-A8OQ	BRCA	4
TCGA-A2-A0CX	BRCA	4
TCGA-EW-A6SD	BRCA	4
TCGA-A8-A07J	BRCA	4
TCGA-BH-A0DX	BRCA	4
TCGA-BH-A0DG	BRCA	4
TCGA-BH-A8FZ	BRCA	4
TCGA-C8-A12O	BRCA	4
TCGA-E2-A10F	BRCA	4
TCGA-A8-A07E	BRCA	4
TCGA-E9-A1N4	BRCA	4
TCGA-E2-A1B1	BRCA	4
TCGA-BH-A0EB	BRCA	4
TCGA-D8-A1XM	BRCA	4
TCGA-A8-A09D	BRCA	4
TCGA-BH-A0BR	BRCA	4
TCGA-BH-A0DS	BRCA	4
TCGA-BH-A1FU	BRCA	4
TCGA-BH-A208	BRCA	4
TCGA-BH-A0BC	BRCA	4
TCGA-BH-A0DZ	BRCA	4
TCGA-BH-A0HF	BRCA	4
TCGA-C8-A1HK	BRCA	1
TCGA-A8-A07R	BRCA	1
TCGA-AC-A62X	BRCA	1
TCGA-AN-A0FL	BRCA	1
TCGA-A2-A0D4	BRCA	1
TCGA-A8-A06Z	BRCA	1
TCGA-E9-A1R6	BRCA	1
TCGA-AN-A0XR	BRCA	1
TCGA-C8-A1HI	BRCA	1
TCGA-EW-A1PC	BRCA	1
TCGA-B6-A0WW	BRCA	1
TCGA-AR-A1AH	BRCA	1
TCGA-E2-A15O	BRCA	1
TCGA-E2-A1IG	BRCA	1
TCGA-A7-A13D	BRCA	1
TCGA-A7-A13E	BRCA	1
TCGA-BH-A0H6	BRCA	1
TCGA-EW-A1P6	BRCA	1
TCGA-E2-A570	BRCA	1
TCGA-EW-A424	BRCA	1
TCGA-B6-A0RN	BRCA	1
TCGA-BH-A0HY	BRCA	1
TCGA-E9-A1N8	BRCA	1
TCGA-A8-A07L	BRCA	1
TCGA-B6-A1KF	BRCA	1
TCGA-A2-A0EU	BRCA	1
TCGA-E9-A1RE	BRCA	1
TCGA-B6-A0IA	BRCA	1
TCGA-BH-A0HU	BRCA	1
TCGA-AO-A03P	BRCA	1
TCGA-B6-A0I1	BRCA	1
TCGA-E2-A15H	BRCA	1
TCGA-3C-AAAU	BRCA	1
TCGA-E2-A106	BRCA	1
TCGA-B6-A2IU	BRCA	1
TCGA-E2-A15R	BRCA	1
TCGA-A7-A0CD	BRCA	1
TCGA-AC-A2FM	BRCA	1
TCGA-BH-A28Q	BRCA	1
TCGA-A2-A4S0	BRCA	1
TCGA-D8-A1JI	BRCA	1
TCGA-B6-A0X0	BRCA	1
TCGA-A7-A4SB	BRCA	1
TCGA-BH-A0HL	BRCA	1
TCGA-B6-A0RM	BRCA	1
TCGA-A2-A0ER	BRCA	1
TCGA-B6-A0X5	BRCA	1
TCGA-BH-A0HN	BRCA	1
TCGA-A2-A0CQ	BRCA	1
TCGA-BH-A8FY	BRCA	1
TCGA-AC-A8OR	BRCA	1
TCGA-E2-A14T	BRCA	1
TCGA-BH-A18S	BRCA	1
TCGA-D8-A1JS	BRCA	1
TCGA-A2-A0T3	BRCA	1
TCGA-B6-A0RO	BRCA	1
TCGA-AN-A0FY	BRCA	1
TCGA-BH-A0E1	BRCA	1
TCGA-AO-A12H	BRCA	1
TCGA-E2-A1B4	BRCA	1
TCGA-A1-A0SB	BRCA	1
TCGA-AR-A0TP	BRCA	1
TCGA-A2-A25E	BRCA	1
TCGA-A7-A0D9	BRCA	1
TCGA-E2-A1L6	BRCA	1
TCGA-E9-A2JS	BRCA	1
TCGA-EW-A1PA	BRCA	1
TCGA-E2-A1IL	BRCA	1
TCGA-A8-A08G	BRCA	1
TCGA-AN-A041	BRCA	1
TCGA-OL-A66O	BRCA	1
TCGA-S3-AA12	BRCA	1
TCGA-D8-A3Z6	BRCA	1
TCGA-OL-A66K	BRCA	1
TCGA-A2-A0CT	BRCA	1
TCGA-B6-A40B	BRCA	1
TCGA-AC-A3EH	BRCA	1
TCGA-EW-A1P3	BRCA	1
TCGA-A7-A3RF	BRCA	1
TCGA-OL-A5D8	BRCA	1
TCGA-D8-A1XA	BRCA	1
TCGA-Z7-A8R6	BRCA	1
TCGA-C8-A133	BRCA	1
TCGA-EW-A1OY	BRCA	1
TCGA-UL-AAZ6	BRCA	1
TCGA-PL-A8LX	BRCA	1
TCGA-AO-A12B	BRCA	1
TCGA-AQ-A1H2	BRCA	1
TCGA-AN-A0FK	BRCA	1
TCGA-C8-A1HO	BRCA	1
TCGA-A8-A06N	BRCA	1
TCGA-A8-A083	BRCA	1
TCGA-D8-A1XC	BRCA	1
TCGA-AC-A5XU	BRCA	1
TCGA-BH-A18L	BRCA	1
TCGA-E2-A2P6	BRCA	1
TCGA-A7-A3IZ	BRCA	1
TCGA-AN-A0XT	BRCA	1
TCGA-B6-A1KC	BRCA	1
TCGA-BH-A0B8	BRCA	1
TCGA-BH-A0H0	BRCA	1
TCGA-E2-A15P	BRCA	1
TCGA-A2-A1FV	BRCA	1
TCGA-A8-A09V	BRCA	1
TCGA-BH-A1FL	BRCA	1
TCGA-E2-A155	BRCA	1
TCGA-B6-A0WT	BRCA	1
TCGA-A2-A04R	BRCA	1
TCGA-BH-A0E7	BRCA	1
TCGA-LQ-A4E4	BRCA	1
TCGA-A8-A06Y	BRCA	1
TCGA-B6-A0WV	BRCA	1
TCGA-E2-A154	BRCA	1
TCGA-E9-A1RC	BRCA	1
TCGA-A8-A0AB	BRCA	1
TCGA-S3-AA11	BRCA	1
TCGA-A7-A13G	BRCA	1
TCGA-D8-A1XR	BRCA	1
TCGA-A8-A09C	BRCA	1
TCGA-D8-A27P	BRCA	1
TCGA-D8-A13Y	BRCA	1
TCGA-A8-A085	BRCA	1
TCGA-E9-A245	BRCA	1
TCGA-E9-A54X	BRCA	1
TCGA-B6-A0X4	BRCA	1
TCGA-E9-A1N3	BRCA	1
TCGA-B6-A0IC	BRCA	1
TCGA-BH-A0HW	BRCA	1
TCGA-A8-A08O	BRCA	1
TCGA-BH-A1ES	BRCA	1
TCGA-C8-A26Z	BRCA	1
TCGA-E2-A1IE	BRCA	1
TCGA-AN-A0FZ	BRCA	1
TCGA-D8-A1XD	BRCA	1
TCGA-E9-A1R7	BRCA	1
TCGA-D8-A1XV	BRCA	1
TCGA-A2-A1G4	BRCA	1
TCGA-BH-A204	BRCA	1
TCGA-E2-A15G	BRCA	1
TCGA-AO-A1KP	BRCA	1
TCGA-E2-A15T	BRCA	1
TCGA-BH-A1FJ	BRCA	1
TCGA-C8-A274	BRCA	1
TCGA-AO-A0J7	BRCA	1
TCGA-EW-A6SA	BRCA	1
TCGA-E2-A15S	BRCA	1
TCGA-EW-A2FW	BRCA	1
TCGA-AR-A0TY	BRCA	1
TCGA-E9-A247	BRCA	1
TCGA-AR-A24K	BRCA	1
TCGA-E2-A15J	BRCA	1
TCGA-AO-A125	BRCA	1
TCGA-EW-A1OX	BRCA	1
TCGA-AC-A7VB	BRCA	1
TCGA-B6-A0RL	BRCA	1
TCGA-E2-A105	BRCA	1
TCGA-C8-A3M8	BRCA	1
TCGA-E9-A5UO	BRCA	1
TCGA-B6-A0RG	BRCA	1
TCGA-E2-A14W	BRCA	1
TCGA-AN-A0XO	BRCA	1
TCGA-B6-A0WZ	BRCA	1
TCGA-E9-A1NI	BRCA	1
TCGA-E2-A14V	BRCA	1
TCGA-JL-A3YX	BRCA	1
TCGA-A7-A5ZX	BRCA	1
TCGA-E2-A15E	BRCA	1
TCGA-B6-A0I8	BRCA	1
TCGA-A2-A0CU	BRCA	1
TCGA-A8-A09B	BRCA	1
TCGA-A8-A093	BRCA	1
TCGA-B6-A1KI	BRCA	1
TCGA-BH-A0W4	BRCA	1
TCGA-B6-A0IB	BRCA	1
TCGA-LL-A6FP	BRCA	1
TCGA-A2-A0CY	BRCA	1
TCGA-A2-A0T5	BRCA	1
TCGA-OL-A6VR	BRCA	1
TCGA-AC-A6NO	BRCA	1
TCGA-E2-A1BD	BRCA	1
TCGA-AR-A0TR	BRCA	1
TCGA-C8-A27A	BRCA	1
TCGA-D8-A1XF	BRCA	1
TCGA-A2-A25C	BRCA	1
TCGA-AO-A1KS	BRCA	1
TCGA-E9-A1RD	BRCA	1
TCGA-AN-A0XP	BRCA	1
TCGA-EW-A1J3	BRCA	1
TCGA-BH-A0W3	BRCA	1
TCGA-A2-A0YG	BRCA	1
TCGA-AR-A0U3	BRCA	1
TCGA-A2-A0YF	BRCA	1
TCGA-AR-A24M	BRCA	1
TCGA-D8-A1XU	BRCA	1
TCGA-E9-A226	BRCA	1
TCGA-A7-A26E	BRCA	1
TCGA-D8-A1X7	BRCA	1
TCGA-C8-A1HE	BRCA	1
TCGA-D8-A1XG	BRCA	1
TCGA-A8-A07S	BRCA	1
TCGA-LL-A442	BRCA	1
TCGA-A7-A0CH	BRCA	1
TCGA-AN-A0FV	BRCA	1
TCGA-BH-A0BS	BRCA	1
TCGA-E2-A156	BRCA	1
TCGA-B6-A0IM	BRCA	1
TCGA-BH-A18N	BRCA	1
TCGA-A7-A26J	BRCA	1
TCGA-AR-A0TZ	BRCA	1
TCGA-AR-A24L	BRCA	1
TCGA-AR-A24Z	BRCA	1
TCGA-A8-A086	BRCA	1
TCGA-BH-A18J	BRCA	1
TCGA-A7-A6VX	BRCA	1
TCGA-EW-A6S9	BRCA	1
TCGA-C8-A137	BRCA	1
TCGA-D8-A1XJ	BRCA	1
TCGA-E2-A1LB	BRCA	1
TCGA-A8-A09T	BRCA	1
TCGA-BH-A1EN	BRCA	1
TCGA-B6-A0I6	BRCA	1
TCGA-AC-A23H	BRCA	1
TCGA-BH-A1EV	BRCA	1
TCGA-A8-A079	BRCA	1
TCGA-E9-A1RB	BRCA	1
TCGA-A8-A082	BRCA	1
TCGA-EW-A1PD	BRCA	1
TCGA-AQ-A04L	BRCA	1
TCGA-C8-A1HL	BRCA	1
TCGA-BH-A1FN	BRCA	1
TCGA-BH-A201	BRCA	1
TCGA-BH-A0H9	BRCA	1
TCGA-BH-A18K	BRCA	1
TCGA-A8-A092	BRCA	1
TCGA-C8-A1HN	BRCA	1
TCGA-D8-A1JJ	BRCA	1
TCGA-C8-A12Z	BRCA	1
TCGA-E9-A1RH	BRCA	1
TCGA-A1-A0SQ	BRCA	1
TCGA-E2-A10A	BRCA	1
TCGA-A2-A0EM	BRCA	1
TCGA-D8-A1JT	BRCA	1
TCGA-BH-A0HI	BRCA	1
TCGA-C8-A12N	BRCA	1
TCGA-A7-A13F	BRCA	1
TCGA-E2-A1IN	BRCA	1
TCGA-AR-A1AS	BRCA	1
TCGA-B6-A0RI	BRCA	1
TCGA-E9-A228	BRCA	1
TCGA-AR-A1AV	BRCA	1
TCGA-AR-A2LK	BRCA	1
TCGA-E2-A15L	BRCA	1
TCGA-E2-A1BC	BRCA	1
TCGA-BH-A0EI	BRCA	1
TCGA-D8-A1XB	BRCA	1
TCGA-AO-A12C	BRCA	1
TCGA-E9-A1R5	BRCA	1
TCGA-A7-A0DB	BRCA	1
TCGA-BH-A0HQ	BRCA	1
TCGA-AN-A0FS	BRCA	1
TCGA-A8-A08T	BRCA	1
TCGA-D8-A73X	BRCA	1
TCGA-A8-A08A	BRCA	2
TCGA-A8-A08J	BRCA	2
TCGA-A8-A07W	BRCA	2
TCGA-D8-A1X6	BRCA	2
TCGA-D8-A1JA	BRCA	2
TCGA-BH-A1FD	BRCA	2
TCGA-A2-A25B	BRCA	2
TCGA-BH-A18U	BRCA	2
TCGA-D8-A1XT	BRCA	2
TCGA-BH-A0HO	BRCA	2
TCGA-E9-A229	BRCA	2
TCGA-E9-A24A	BRCA	2
TCGA-A2-A0CS	BRCA	2
TCGA-BH-A1FG	BRCA	2
TCGA-AO-A12E	BRCA	2
TCGA-A8-A07P	BRCA	2
TCGA-EW-A1OZ	BRCA	2
TCGA-EW-A1IX	BRCA	2
TCGA-E2-A152	BRCA	2
TCGA-E9-A1R3	BRCA	2
TCGA-AO-A0J5	BRCA	2
TCGA-BH-A0BP	BRCA	2
TCGA-AR-A24P	BRCA	2
TCGA-D8-A1J9	BRCA	2
TCGA-E2-A1L9	BRCA	2
TCGA-GM-A2DL	BRCA	2
TCGA-D8-A1Y1	BRCA	2
TCGA-E9-A1NA	BRCA	2
TCGA-A8-A0AD	BRCA	2
TCGA-A8-A076	BRCA	2
TCGA-AQ-A0Y5	BRCA	2
TCGA-D8-A1XY	BRCA	2
TCGA-BH-A1F2	BRCA	2
TCGA-BH-A1FM	BRCA	2
TCGA-A8-A06P	BRCA	2
TCGA-AC-A23E	BRCA	2
TCGA-A1-A0SM	BRCA	2
TCGA-E9-A1NH	BRCA	2
TCGA-E2-A153	BRCA	2
TCGA-E9-A1N6	BRCA	2
TCGA-E9-A5UP	BRCA	2
TCGA-BH-A0AU	BRCA	2
TCGA-B6-A0WY	BRCA	2
TCGA-UU-A93S	BRCA	2
TCGA-E9-A1R2	BRCA	2
TCGA-B6-A0IQ	BRCA	2
TCGA-B6-A0IK	BRCA	2
TCGA-BH-A0BT	BRCA	2
TCGA-E9-A22H	BRCA	2
TCGA-A2-A0CW	BRCA	2
TCGA-B6-A0IG	BRCA	2
TCGA-A2-A1FX	BRCA	2
TCGA-C8-A12X	BRCA	2
TCGA-PE-A5DC	BRCA	2
TCGA-B6-A40C	BRCA	2
TCGA-AO-A0JM	BRCA	2
TCGA-BH-A0DH	BRCA	2
TCGA-BH-A42T	BRCA	2
TCGA-C8-A273	BRCA	2
TCGA-C8-A26V	BRCA	2
TCGA-BH-A0B1	BRCA	2
TCGA-C8-A12Y	BRCA	2
TCGA-B6-A0IO	BRCA	2
TCGA-AR-A24H	BRCA	2
TCGA-BH-A0DD	BRCA	2
TCGA-E2-A15F	BRCA	2
TCGA-B6-A1KN	BRCA	2
TCGA-BH-A0C7	BRCA	2
TCGA-D8-A1JN	BRCA	2
TCGA-AO-A0JD	BRCA	2
TCGA-BH-A18T	BRCA	2
TCGA-AN-A0AK	BRCA	2
TCGA-A8-A06O	BRCA	2
TCGA-C8-A130	BRCA	2
TCGA-A2-A0YT	BRCA	2
TCGA-A7-A0CJ	BRCA	2
TCGA-B6-A0I9	BRCA	2
TCGA-EW-A1P0	BRCA	2
TCGA-A8-A0A9	BRCA	2
TCGA-E2-A14O	BRCA	2
TCGA-OL-A5DA	BRCA	2
TCGA-E2-A56Z	BRCA	2
TCGA-GM-A2DC	BRCA	2
TCGA-E2-A107	BRCA	2
TCGA-E9-A54Y	BRCA	2
TCGA-AO-A0J3	BRCA	2
TCGA-S3-A6ZH	BRCA	2
TCGA-E9-A249	BRCA	2
TCGA-A8-A06Q	BRCA	2
TCGA-A8-A08C	BRCA	2
TCGA-AR-A5QP	BRCA	2
TCGA-GM-A3XG	BRCA	2
TCGA-OL-A5RZ	BRCA	2
TCGA-A2-A0D1	BRCA	2
TCGA-5T-A9QA	BRCA	2
TCGA-B6-A0IE	BRCA	2
TCGA-BH-A0GZ	BRCA	2
TCGA-A2-A04N	BRCA	2
TCGA-S3-AA14	BRCA	2
TCGA-A8-A0A4	BRCA	2
TCGA-B6-A0X7	BRCA	2
TCGA-W8-A86G	BRCA	2
TCGA-BH-A1ET	BRCA	2
TCGA-EW-A1PG	BRCA	2
TCGA-AC-A2FG	BRCA	2
TCGA-AR-A24W	BRCA	2
TCGA-B6-A0RQ	BRCA	2
TCGA-BH-A0DO	BRCA	2
TCGA-A2-A0YC	BRCA	2
TCGA-AR-A1AU	BRCA	2
TCGA-BH-A0EA	BRCA	2
TCGA-A2-A3KC	BRCA	2
TCGA-HN-A2OB	BRCA	2
TCGA-AC-A4ZE	BRCA	2
TCGA-OL-A5RV	BRCA	2
TCGA-A2-A3KD	BRCA	2
TCGA-AC-A3W7	BRCA	2
TCGA-D8-A3Z5	BRCA	2
TCGA-E2-A14U	BRCA	2
TCGA-OL-A5RX	BRCA	2
TCGA-A8-A091	BRCA	2
TCGA-E2-A15D	BRCA	2
TCGA-BH-A5IZ	BRCA	2
TCGA-A2-A04W	BRCA	2
TCGA-LL-A6FR	BRCA	2
TCGA-B6-A0RE	BRCA	2
TCGA-E2-A9RU	BRCA	2
TCGA-C8-A12L	BRCA	2
TCGA-AN-A04A	BRCA	2
TCGA-AO-A1KT	BRCA	2
TCGA-A2-A0YJ	BRCA	2
TCGA-AO-A03N	BRCA	2
TCGA-A2-A04V	BRCA	2
TCGA-B6-A0RU	BRCA	2
TCGA-A8-A07B	BRCA	2
TCGA-E9-A244	BRCA	2
TCGA-AR-A251	BRCA	2
TCGA-D8-A1XO	BRCA	2
TCGA-E9-A1RI	BRCA	2
TCGA-BH-A0GY	BRCA	2
TCGA-BH-A0HK	BRCA	2
TCGA-EW-A1IW	BRCA	2
TCGA-BH-A0E2	BRCA	2
TCGA-A1-A0SJ	BRCA	2
TCGA-A8-A09A	BRCA	2
TCGA-AR-A24X	BRCA	2
TCGA-E2-A10E	BRCA	2
TCGA-D8-A1XS	BRCA	2
TCGA-E2-A1L8	BRCA	2
TCGA-AR-A2LE	BRCA	2
TCGA-A8-A099	BRCA	2
TCGA-AO-A03V	BRCA	2
TCGA-A1-A0SE	BRCA	2
TCGA-A8-A095	BRCA	2
TCGA-S3-A6ZG	BRCA	2
TCGA-AQ-A04H	BRCA	2
TCGA-BH-A18P	BRCA	2
TCGA-A1-A0SD	BRCA	3
TCGA-AO-A0JA	BRCA	3
TCGA-BH-A18F	BRCA	3
TCGA-A2-A259	BRCA	3
TCGA-D8-A27L	BRCA	3
TCGA-C8-A12W	BRCA	3
TCGA-EW-A1PF	BRCA	3
TCGA-A7-A26H	BRCA	3
TCGA-A8-A097	BRCA	3
TCGA-D8-A1X5	BRCA	3
TCGA-BH-A1EX	BRCA	3
TCGA-C8-A12Q	BRCA	3
TCGA-A2-A1FZ	BRCA	3
TCGA-BH-A0BO	BRCA	3
TCGA-AR-A24T	BRCA	3
TCGA-D8-A1X8	BRCA	3
TCGA-A1-A0SH	BRCA	3
TCGA-A8-A08Z	BRCA	3
TCGA-AN-A0AS	BRCA	3
TCGA-AC-A6IX	BRCA	3
TCGA-AR-A1AP	BRCA	3
TCGA-EW-A6SC	BRCA	3
TCGA-A8-A09W	BRCA	3
TCGA-E9-A22B	BRCA	3
TCGA-BH-A0HX	BRCA	3
TCGA-AR-A1AN	BRCA	3
TCGA-BH-A0DQ	BRCA	3
TCGA-A7-A5ZW	BRCA	3
TCGA-C8-A12T	BRCA	3
TCGA-E9-A1NF	BRCA	3
TCGA-EW-A2FR	BRCA	3
TCGA-LL-A5YP	BRCA	3
TCGA-A7-A425	BRCA	3
TCGA-LD-A74U	BRCA	3
TCGA-D8-A1JH	BRCA	3
TCGA-AR-A2LQ	BRCA	3
TCGA-BH-A1FH	BRCA	3
TCGA-EW-A1J2	BRCA	3
TCGA-GI-A2C8	BRCA	3
TCGA-A8-A07I	BRCA	3
TCGA-AR-A250	BRCA	3
TCGA-AR-A24V	BRCA	3
TCGA-D8-A1JD	BRCA	3
TCGA-AR-A255	BRCA	3
TCGA-D8-A1JE	BRCA	3
TCGA-AR-A24S	BRCA	3
TCGA-BH-A1EO	BRCA	3
TCGA-AN-A0XN	BRCA	3
TCGA-D8-A1XW	BRCA	3
TCGA-D8-A27N	BRCA	3
TCGA-E9-A1NG	BRCA	3
TCGA-A8-A09R	BRCA	3
TCGA-EW-A1P5	BRCA	3
TCGA-A7-A3IY	BRCA	3
TCGA-AN-A049	BRCA	3
TCGA-AN-A0FF	BRCA	3
TCGA-E2-A10B	BRCA	3
TCGA-AO-A0J8	BRCA	3
TCGA-AR-A5QM	BRCA	3
TCGA-AC-A3YI	BRCA	3
TCGA-A2-A0SV	BRCA	3
TCGA-A8-A090	BRCA	3
TCGA-D8-A73W	BRCA	3
TCGA-4H-AAAK	BRCA	3
TCGA-A2-A0T7	BRCA	3
TCGA-WT-AB44	BRCA	3
TCGA-BH-A0B5	BRCA	3
TCGA-A2-A4RW	BRCA	3
TCGA-A7-A4SC	BRCA	3
TCGA-AR-A1AL	BRCA	3
TCGA-D8-A145	BRCA	3
TCGA-AN-A0XL	BRCA	3
TCGA-AR-A2LM	BRCA	3
TCGA-AO-A1KO	BRCA	3
TCGA-BH-A0H3	BRCA	3
TCGA-AN-A0XV	BRCA	3
TCGA-E2-A15I	BRCA	3
TCGA-C8-A12M	BRCA	3
TCGA-E2-A15C	BRCA	3
TCGA-A8-A0A2	BRCA	3
TCGA-D8-A27V	BRCA	3
TCGA-A2-A1G0	BRCA	3
TCGA-BH-A0E9	BRCA	3
TCGA-E2-A1IU	BRCA	3
TCGA-BH-AB28	BRCA	3
TCGA-AC-A3YJ	BRCA	3
TCGA-E2-A14S	BRCA	3
TCGA-GM-A2DM	BRCA	3
TCGA-BH-A1FR	BRCA	3
TCGA-D8-A27E	BRCA	3
TCGA-D8-A27K	BRCA	3
TCGA-AC-A23C	BRCA	3
TCGA-AQ-A1H3	BRCA	3
TCGA-BH-A18R	BRCA	3
TCGA-A8-A07F	BRCA	3
TCGA-BH-A1F8	BRCA	3
TCGA-E2-A14Y	BRCA	3
TCGA-E9-A22G	BRCA	3
TCGA-AR-A24N	BRCA	3
TCGA-BH-A0HP	BRCA	3
TCGA-D8-A27W	BRCA	3
TCGA-A7-A3J0	BRCA	3
TCGA-EW-A1J1	BRCA	3
TCGA-A2-A0ET	BRCA	3
TCGA-AR-A24R	BRCA	3
TCGA-A2-A1FW	BRCA	3
TCGA-E2-A109	BRCA	3
TCGA-AR-A1AM	BRCA	3
TCGA-AC-A8OP	BRCA	3
TCGA-LD-A7W6	BRCA	3
TCGA-AO-A0JI	BRCA	3
TCGA-GM-A5PV	BRCA	3
TCGA-AR-A5QN	BRCA	3
TCGA-GM-A3NW	BRCA	3
TCGA-C8-A12P	BRCA	3
TCGA-D8-A1JP	BRCA	3
TCGA-D8-A1X9	BRCA	3
TCGA-BH-A203	BRCA	3
TCGA-A8-A06R	BRCA	3
TCGA-A8-A07G	BRCA	3
TCGA-D8-A1XZ	BRCA	3
TCGA-A7-A2KD	BRCA	3
TCGA-A8-A09I	BRCA	3
TCGA-S3-A6ZF	BRCA	3
TCGA-AO-A03L	BRCA	3
TCGA-D8-A1JC	BRCA	3
TCGA-E2-A14P	BRCA	3
TCGA-A2-A0SU	BRCA	3
TCGA-A7-A4SF	BRCA	3
TCGA-A8-A07Z	BRCA	3
TCGA-BH-A6R8	BRCA	3
TCGA-A8-A06U	BRCA	3
TCGA-A8-A06X	BRCA	3
TCGA-A2-A0D3	BRCA	3
TCGA-AN-A0FW	BRCA	3
TCGA-GM-A3NY	BRCA	3
TCGA-AN-A0FJ	BRCA	3
TCGA-AN-A0FX	BRCA	3
TCGA-B6-A0IP	BRCA	3
TCGA-E9-A1N9	BRCA	3
TCGA-AN-A04C	BRCA	3
TCGA-E9-A1RA	BRCA	3
TCGA-A2-A0CP	BRCA	3
TCGA-E2-A1IF	BRCA	3
TCGA-GM-A5PX	BRCA	3
TCGA-A1-A0SG	BRCA	3
TCGA-A2-A0EX	BRCA	3
TCGA-OL-A66J	BRCA	3
TCGA-BH-A0BM	BRCA	3
TCGA-GM-A2D9	BRCA	3
TCGA-B6-A401	BRCA	3
TCGA-BH-A0AZ	BRCA	3
TCGA-A2-A0EY	BRCA	3
TCGA-BH-A0BJ	BRCA	3
TCGA-AO-A12G	BRCA	3
TCGA-V7-A7HQ	BRCA	3
TCGA-AC-A3TN	BRCA	3
TCGA-E2-A572	BRCA	3
TCGA-E9-A1RG	BRCA	3
TCGA-AC-A62V	BRCA	3
TCGA-LL-A6FQ	BRCA	3
TCGA-BH-A0H7	BRCA	3
TCGA-AC-A3QP	BRCA	3
TCGA-AN-A0FT	BRCA	3
TCGA-B6-A0WX	BRCA	3
TCGA-LL-A7T0	BRCA	3
TCGA-A2-A3XV	BRCA	3
TCGA-AO-A0JB	BRCA	3
TCGA-B6-A0I5	BRCA	3
TCGA-AN-A03Y	BRCA	3
TCGA-E9-A295	BRCA	3
TCGA-E2-A2P5	BRCA	3
TCGA-E2-A576	BRCA	3
TCGA-AO-A03U	BRCA-TN	6
TCGA-EW-A1P4	BRCA-TN	6
TCGA-AR-A2LH	BRCA-TN	6
TCGA-S3-AA15	BRCA-TN	6
TCGA-A2-A04Q	BRCA-TN	6
TCGA-C8-A12V	BRCA-TN	6
TCGA-EW-A3U0	BRCA-TN	6
TCGA-A2-A0ST	BRCA-TN	6
TCGA-EW-A1OV	BRCA-TN	6
TCGA-EW-A1P7	BRCA-TN	6
TCGA-GM-A2DI	BRCA-TN	6
TCGA-BH-A0RX	BRCA-TN	6
TCGA-C8-A26X	BRCA-TN	6
TCGA-OL-A66I	BRCA-TN	6
TCGA-LL-A5YO	BRCA-TN	6
TCGA-OL-A66P	BRCA-TN	6
TCGA-AC-A6IW	BRCA-TN	6
TCGA-AR-A5QQ	BRCA-TN	6
TCGA-GM-A2DD	BRCA-TN	6
TCGA-E2-A1LH	BRCA-TN	6
TCGA-S3-AA10	BRCA-TN	6
TCGA-AO-A128	BRCA-TN	6
TCGA-AR-A1AQ	BRCA-TN	6
TCGA-EW-A1PB	BRCA-TN	6
TCGA-A2-A0CM	BRCA-TN	6
TCGA-E2-A159	BRCA-TN	6
TCGA-B6-A3ZX	BRCA-TN	6
TCGA-E2-A1B6	BRCA-TN	6
TCGA-E2-A573	BRCA-TN	6
TCGA-AO-A0J6	BRCA-TN	6
TCGA-GM-A3XL	BRCA-TN	6
TCGA-BH-A1FC	BRCA-TN	6
TCGA-EW-A6SB	BRCA-TN	6
TCGA-BH-A42U	BRCA-TN	5
TCGA-OL-A97C	BRCA-TN	5
TCGA-E2-A1L7	BRCA-TN	5
TCGA-GM-A2DH	BRCA-TN	5
TCGA-BH-A0BG	BRCA-TN	5
TCGA-AO-A129	BRCA-TN	5
TCGA-OL-A5D7	BRCA-TN	5
TCGA-AO-A0J2	BRCA-TN	5
TCGA-A2-A0D0	BRCA-TN	5
TCGA-AO-A1KR	BRCA-TN	5
TCGA-BH-A0B9	BRCA-TN	5
TCGA-GM-A2DB	BRCA-TN	5
TCGA-AR-A0TU	BRCA-TN	5
TCGA-BH-A0E6	BRCA-TN	5
TCGA-AR-A0U4	BRCA-TN	5
TCGA-A8-A09X	BRCA-TN	5
TCGA-D8-A1JL	BRCA-TN	5
TCGA-BH-A1F6	BRCA-TN	5
TCGA-EW-A1P1	BRCA-TN	5
TCGA-BH-A0BW	BRCA-TN	5
TCGA-C8-A27B	BRCA-TN	5
TCGA-A8-A08R	BRCA-TN	5
TCGA-AO-A0J4	BRCA-TN	5
TCGA-AR-A1AI	BRCA-TN	5
TCGA-AQ-A04J	BRCA-TN	5
TCGA-LL-A441	BRCA-TN	5
TCGA-AR-A0TS	BRCA-TN	5
TCGA-D8-A27M	BRCA-TN	5
TCGA-A2-A0SX	BRCA-TN	5
TCGA-BH-A0BL	BRCA-TN	5
TCGA-GM-A2DF	BRCA-TN	4
TCGA-AC-A2QJ	BRCA-TN	4
TCGA-A2-A3XY	BRCA-TN	4
TCGA-A7-A6VY	BRCA-TN	4
TCGA-D8-A1XQ	BRCA-TN	4
TCGA-BH-A0B3	BRCA-TN	4
TCGA-D8-A13Z	BRCA-TN	4
TCGA-A7-A4SD	BRCA-TN	4
TCGA-BH-A18V	BRCA-TN	4
TCGA-E2-A1AZ	BRCA-TN	4
TCGA-AR-A1AR	BRCA-TN	4
TCGA-AN-A0AL	BRCA-TN	4
TCGA-D8-A1JG	BRCA-TN	4
TCGA-A2-A04T	BRCA-TN	3
TCGA-E2-A14R	BRCA-TN	3
TCGA-A2-A0D2	BRCA-TN	3
TCGA-A8-A07C	BRCA-TN	3
TCGA-E2-A14X	BRCA-TN	3
TCGA-D8-A1JF	BRCA-TN	3
TCGA-E2-A1LG	BRCA-TN	3
TCGA-A2-A1G6	BRCA-TN	3
TCGA-C8-A3M7	BRCA-TN	3
TCGA-A2-A0T2	BRCA-TN	3
TCGA-BH-A18G	BRCA-TN	3
TCGA-A2-A3XU	BRCA-TN	3
TCGA-E2-A574	BRCA-TN	3
TCGA-EW-A1PH	BRCA-TN	3
TCGA-OL-A5RW	BRCA-TN	3
TCGA-A2-A04P	BRCA-TN	3
TCGA-HN-A2NL	BRCA-TN	3
TCGA-A2-A3XX	BRCA-TN	3
TCGA-A2-A3XS	BRCA-TN	3
TCGA-AN-A0AT	BRCA-TN	3
TCGA-D8-A143	BRCA-TN	3
TCGA-E2-A14N	BRCA-TN	1
TCGA-AO-A124	BRCA-TN	1
TCGA-E2-A1LI	BRCA-TN	1
TCGA-BH-A0WA	BRCA-TN	1
TCGA-OL-A6VO	BRCA-TN	1
TCGA-BH-A0E0	BRCA-TN	1
TCGA-E2-A1LK	BRCA-TN	1
TCGA-AO-A0JL	BRCA-TN	1
TCGA-B6-A409	BRCA-TN	1
TCGA-E2-A1LL	BRCA-TN	1
TCGA-AR-A1AY	BRCA-TN	1
TCGA-AR-A256	BRCA-TN	1
TCGA-A7-A0CE	BRCA-TN	1
TCGA-AO-A12F	BRCA-TN	1
TCGA-E2-A1LS	BRCA-TN	1
TCGA-A7-A0DA	BRCA-TN	1
TCGA-B6-A402	BRCA-TN	1
TCGA-AQ-A54N	BRCA-TN	1
TCGA-A2-A0YE	BRCA-TN	1
TCGA-E2-A158	BRCA-TN	1
TCGA-C8-A1HJ	BRCA-TN	1
TCGA-A1-A0SK	BRCA-TN	1
TCGA-AC-A2BK	BRCA-TN	1
TCGA-AN-A0AR	BRCA-TN	1
TCGA-A1-A0SO	BRCA-TN	1
TCGA-AN-A04D	BRCA-TN	1
TCGA-A2-A04U	BRCA-TN	1
TCGA-C8-A26Y	BRCA-TN	1
TCGA-A2-A0T0	BRCA-TN	2
TCGA-A8-A07O	BRCA-TN	2
TCGA-D8-A1XK	BRCA-TN	2
TCGA-AN-A0G0	BRCA-TN	2
TCGA-AN-A0XU	BRCA-TN	2
TCGA-A2-A3XT	BRCA-TN	2
TCGA-A7-A6VW	BRCA-TN	2
TCGA-B6-A400	BRCA-TN	2
TCGA-A7-A26G	BRCA-TN	2
TCGA-BH-A1EW	BRCA-TN	2
TCGA-D8-A147	BRCA-TN	2
TCGA-LL-A73Y	BRCA-TN	2
TCGA-A1-A0SP	BRCA-TN	2
TCGA-EW-A1P8	BRCA-TN	2
TCGA-E2-A150	BRCA-TN	2
TCGA-A7-A26F	BRCA-TN	2
TCGA-A2-A0YM	BRCA-TN	2
TCGA-LL-A740	BRCA-TN	2
TCGA-OL-A5D6	BRCA-TN	2
TCGA-A7-A6VV	BRCA-TN	2
TCGA-D8-A142	BRCA-TN	2
TCGA-C8-A131	BRCA-TN	2
TCGA-AC-A7VC	BRCA-TN	2
TCGA-E9-A5FL	BRCA-TN	2
TCGA-A7-A26I	BRCA-TN	2
TCGA-GI-A2C9	BRCA-TN	2
TCGA-D8-A27F	BRCA-TN	2
TCGA-EW-A1OW	BRCA-TN	2
TCGA-A7-A4SE	BRCA-TN	2
TCGA-A7-A5ZV	BRCA-TN	2
TCGA-BH-A0AV	BRCA-TN	2
TCGA-AC-A2QH	BRCA-TN	2
TCGA-D8-A27H	BRCA-TN	2
TCGA-C5-A2LY	CESC	6
TCGA-IR-A3LL	CESC	6
TCGA-VS-A8EL	CESC	6
TCGA-VS-A9UH	CESC	6
TCGA-DS-A0VN	CESC	6
TCGA-R2-A69V	CESC	6
TCGA-IR-A3LH	CESC	6
TCGA-MA-AA42	CESC	6
TCGA-VS-A9UD	CESC	6
TCGA-DG-A2KM	CESC	6
TCGA-MY-A5BE	CESC	6
TCGA-EA-A3HU	CESC	6
TCGA-VS-A958	CESC	6
TCGA-EA-A3QE	CESC	6
TCGA-VS-A94Z	CESC	6
TCGA-VS-A9UB	CESC	6
TCGA-EX-A69L	CESC	6
TCGA-VS-AA62	CESC	6
TCGA-C5-A7XC	CESC	6
TCGA-MU-A51Y	CESC	6
TCGA-EK-A2PK	CESC	6
TCGA-DR-A0ZM	CESC	6
TCGA-EA-A3Y4	CESC	6
TCGA-C5-A7CG	CESC	6
TCGA-DS-A1OD	CESC	6
TCGA-BI-A0VR	CESC	6
TCGA-MA-AA3W	CESC	6
TCGA-VS-A8QM	CESC	6
TCGA-EA-A3QD	CESC	6
TCGA-C5-A1BK	CESC	6
TCGA-C5-A2LX	CESC	6
TCGA-UC-A7PF	CESC	6
TCGA-FU-A2QG	CESC	5
TCGA-C5-A2LZ	CESC	5
TCGA-DS-A0VL	CESC	5
TCGA-FU-A23L	CESC	5
TCGA-VS-A9U5	CESC	5
TCGA-C5-A8XI	CESC	5
TCGA-C5-A1M5	CESC	5
TCGA-LP-A7HU	CESC	5
TCGA-C5-A1ME	CESC	5
TCGA-C5-A3HF	CESC	5
TCGA-FU-A40J	CESC	5
TCGA-EK-A2R7	CESC	5
TCGA-Q1-A73P	CESC	5
TCGA-C5-A8YR	CESC	5
TCGA-VS-A94Y	CESC	5
TCGA-C5-A907	CESC	5
TCGA-C5-A8YT	CESC	5
TCGA-LP-A4AU	CESC	5
TCGA-EA-A6QX	CESC	5
TCGA-DS-A7WI	CESC	5
TCGA-VS-A8EI	CESC	5
TCGA-C5-A2M1	CESC	5
TCGA-FU-A3EO	CESC	5
TCGA-JX-A3Q8	CESC	5
TCGA-GH-A9DA	CESC	5
TCGA-VS-A9U6	CESC	5
TCGA-VS-A9V3	CESC	5
TCGA-C5-A1BI	CESC	5
TCGA-LP-A4AX	CESC	5
TCGA-MA-AA3Y	CESC	5
TCGA-C5-A1MH	CESC	5
TCGA-ZJ-AB0H	CESC	5
TCGA-HM-A4S6	CESC	5
TCGA-VS-A9UT	CESC	5
TCGA-ZX-AA5X	CESC	5
TCGA-C5-A1MP	CESC	5
TCGA-RA-A741	CESC	5
TCGA-C5-A1BJ	CESC	5
TCGA-VS-A9UM	CESC	5
TCGA-VS-A94W	CESC	5
TCGA-ZJ-AAX8	CESC	5
TCGA-MU-A8JM	CESC	5
TCGA-C5-A7CJ	CESC	5
TCGA-FU-A3YQ	CESC	5
TCGA-C5-A7X3	CESC	5
TCGA-C5-A1MQ	CESC	5
TCGA-LP-A4AV	CESC	5
TCGA-JX-A3PZ	CESC	5
TCGA-EK-A2H1	CESC	5
TCGA-Q1-A5R2	CESC	5
TCGA-ZJ-AAXU	CESC	5
TCGA-C5-A7UI	CESC	5
TCGA-VS-A9U7	CESC	5
TCGA-EK-A2RA	CESC	5
TCGA-EK-A3GJ	CESC	5
TCGA-MY-A5BF	CESC	5
TCGA-EA-A43B	CESC	5
TCGA-VS-A8Q8	CESC	5
TCGA-EX-A69M	CESC	5
TCGA-VS-A9V2	CESC	5
TCGA-BI-A20A	CESC	5
TCGA-EK-A2R9	CESC	5
TCGA-DS-A1OA	CESC	5
TCGA-EA-A44S	CESC	5
TCGA-C5-A902	CESC	5
TCGA-MA-AA3Z	CESC	5
TCGA-VS-A8EB	CESC	5
TCGA-C5-A1BQ	CESC	5
TCGA-EX-A8YF	CESC	5
TCGA-JW-A5VG	CESC	5
TCGA-ZJ-AAXN	CESC	5
TCGA-Q1-A73O	CESC	5
TCGA-C5-A3HE	CESC	5
TCGA-EK-A2RC	CESC	5
TCGA-C5-A1BF	CESC	5
TCGA-C5-A2LT	CESC	5
TCGA-DS-A1OC	CESC	5
TCGA-EK-A2RJ	CESC	5
TCGA-JX-A5QV	CESC	5
TCGA-DG-A2KJ	CESC	5
TCGA-Q1-A5R3	CESC	5
TCGA-C5-A1MF	CESC	5
TCGA-FU-A23K	CESC	5
TCGA-HG-A2PA	CESC	5
TCGA-VS-A9UC	CESC	5
TCGA-ZJ-AAXF	CESC	5
TCGA-EK-A2IR	CESC	1
TCGA-VS-A8EC	CESC	1
TCGA-EK-A2PI	CESC	1
TCGA-EK-A2RL	CESC	1
TCGA-IR-A3LI	CESC	1
TCGA-C5-A2LS	CESC	1
TCGA-VS-A9UP	CESC	1
TCGA-EA-A4BA	CESC	1
TCGA-VS-A9V4	CESC	1
TCGA-C5-A7CK	CESC	1
TCGA-EA-A5FO	CESC	1
TCGA-FU-A3WB	CESC	1
TCGA-DS-A0VK	CESC	1
TCGA-C5-A1M6	CESC	1
TCGA-VS-A9UL	CESC	1
TCGA-VS-A9V0	CESC	1
TCGA-EK-A2PM	CESC	1
TCGA-ZJ-AAXA	CESC	1
TCGA-C5-A905	CESC	1
TCGA-C5-A7UC	CESC	1
TCGA-IR-A3L7	CESC	1
TCGA-EK-A2PG	CESC	1
TCGA-JW-A5VK	CESC	1
TCGA-C5-A1M8	CESC	1
TCGA-Q1-A73S	CESC	1
TCGA-VS-A8EJ	CESC	1
TCGA-C5-A1M9	CESC	1
TCGA-ZJ-AAXB	CESC	1
TCGA-VS-A9UJ	CESC	1
TCGA-HM-A6W2	CESC	1
TCGA-JW-A5VJ	CESC	1
TCGA-FU-A3HY	CESC	1
TCGA-VS-A8QH	CESC	1
TCGA-WL-A834	CESC	1
TCGA-VS-A8EG	CESC	1
TCGA-VS-A8EK	CESC	1
TCGA-EK-A3GM	CESC	1
TCGA-C5-A1BN	CESC	1
TCGA-VS-A94X	CESC	1
TCGA-EK-A2H0	CESC	1
TCGA-ZJ-A8QQ	CESC	1
TCGA-C5-A3HD	CESC	1
TCGA-EK-A3GN	CESC	1
TCGA-VS-A952	CESC	1
TCGA-C5-A2M2	CESC	1
TCGA-VS-A957	CESC	1
TCGA-VS-A9UV	CESC	1
TCGA-DR-A0ZL	CESC	1
TCGA-EX-A1H5	CESC	1
TCGA-MA-AA41	CESC	1
TCGA-DG-A2KK	CESC	1
TCGA-EA-A410	CESC	1
TCGA-C5-A7UH	CESC	1
TCGA-VS-A950	CESC	1
TCGA-JW-A5VH	CESC	1
TCGA-2W-A8YY	CESC	1
TCGA-IR-A3LA	CESC	1
TCGA-EA-A97N	CESC	1
TCGA-VS-A9UQ	CESC	1
TCGA-EA-A5ZF	CESC	1
TCGA-Q1-A73R	CESC	1
TCGA-4J-AA1J	CESC	1
TCGA-C5-A8ZZ	CESC	1
TCGA-DS-A7WH	CESC	1
TCGA-EA-A411	CESC	1
TCGA-FU-A770	CESC	1
TCGA-UC-A7PI	CESC	1
TCGA-Q1-A5R1	CESC	1
TCGA-C5-A7CM	CESC	1
TCGA-VS-A9V5	CESC	1
TCGA-C5-A901	CESC	2
TCGA-EA-A1QS	CESC	2
TCGA-FU-A57G	CESC	2
TCGA-C5-A1MJ	CESC	2
TCGA-MA-AA43	CESC	2
TCGA-C5-A1MK	CESC	2
TCGA-DS-A3LQ	CESC	2
TCGA-EK-A2RM	CESC	2
TCGA-JW-A69B	CESC	2
TCGA-C5-A2LV	CESC	2
TCGA-EX-A3L1	CESC	2
TCGA-DS-A0VM	CESC	2
TCGA-EA-A5ZD	CESC	2
TCGA-DG-A2KL	CESC	2
TCGA-MA-AA3X	CESC	2
TCGA-EA-A3HT	CESC	2
TCGA-EA-A50E	CESC	2
TCGA-C5-A1MN	CESC	2
TCGA-C5-A7CH	CESC	2
TCGA-UC-A7PD	CESC	2
TCGA-EK-A2RE	CESC	2
TCGA-Q1-A6DT	CESC	2
TCGA-C5-A7X5	CESC	2
TCGA-DS-A1OB	CESC	2
TCGA-C5-A7CL	CESC	2
TCGA-ZJ-A8QR	CESC	2
TCGA-C5-A0TN	CESC	2
TCGA-C5-A8XK	CESC	2
TCGA-VS-A9UU	CESC	2
TCGA-ZJ-AAXT	CESC	2
TCGA-C5-A1M7	CESC	2
TCGA-C5-A1BE	CESC	2
TCGA-Q1-A73Q	CESC	2
TCGA-FU-A5XV	CESC	3
TCGA-IR-A3LB	CESC	3
TCGA-VS-A8EH	CESC	3
TCGA-VS-A9V1	CESC	3
TCGA-C5-A7X8	CESC	3
TCGA-FU-A3TQ	CESC	3
TCGA-VS-A9UZ	CESC	3
TCGA-LP-A4AW	CESC	3
TCGA-EA-A3HR	CESC	3
TCGA-EA-A556	CESC	3
TCGA-C5-A8XJ	CESC	3
TCGA-EA-A439	CESC	3
TCGA-UC-A7PG	CESC	3
TCGA-ZJ-AAXD	CESC	3
TCGA-Q1-A6DV	CESC	3
TCGA-DS-A7WF	CESC	3
TCGA-VS-A9UR	CESC	3
TCGA-IR-A3LF	CESC	3
TCGA-MY-A5BD	CESC	3
TCGA-FU-A3HZ	CESC	3
TCGA-LP-A5U2	CESC	3
TCGA-VS-A8QA	CESC	3
TCGA-VS-A8Q9	CESC	3
TCGA-VS-A9UO	CESC	3
TCGA-EK-A2RB	CESC	3
TCGA-EK-A2IP	CESC	3
TCGA-EK-A2PL	CESC	3
TCGA-C5-A7UE	CESC	3
TCGA-EA-A1QT	CESC	3
TCGA-C5-A1ML	CESC	3
TCGA-C5-A3HL	CESC	3
TCGA-FU-A3NI	CESC	3
TCGA-VS-A953	CESC	3
TCGA-ZJ-AAXJ	CESC	3
TCGA-JX-A3Q0	CESC	4
TCGA-ZJ-A8QO	CESC	4
TCGA-DS-A1O9	CESC	4
TCGA-C5-A1BL	CESC	4
TCGA-DS-A5RQ	CESC	4
TCGA-LP-A5U3	CESC	4
TCGA-MY-A913	CESC	4
TCGA-VS-A9UY	CESC	4
TCGA-IR-A3LK	CESC	4
TCGA-C5-A8XH	CESC	4
TCGA-EA-A3HQ	CESC	4
TCGA-EA-A5ZE	CESC	4
TCGA-HM-A3JK	CESC	4
TCGA-VS-A8QF	CESC	4
TCGA-ZJ-AAX4	CESC	4
TCGA-HM-A3JJ	CESC	4
TCGA-C5-A1BM	CESC	4
TCGA-EA-A78R	CESC	4
TCGA-C5-A1MI	CESC	4
TCGA-XS-A8TJ	CESC	4
TCGA-BI-A0VS	CESC	4
TCGA-JW-A5VI	CESC	4
TCGA-C5-A8YQ	CESC	4
TCGA-PN-A8MA	CESC	4
TCGA-VS-A959	CESC	4
TCGA-C5-A7CO	CESC	4
TCGA-ZJ-AAXI	CESC	4
TCGA-EA-A3HS	CESC	4
TCGA-Q1-A6DW	CESC	4
TCGA-EK-A2R8	CESC	4
TCGA-JW-AAVH	CESC	4
TCGA-EX-A1H6	CESC	4
TCGA-IR-A3LC	CESC	4
TCGA-EK-A2GZ	CESC	4
TCGA-EK-A2RN	CESC	4
TCGA-FU-A3TX	CESC	4
TCGA-MU-A5YI	CESC	4
TCGA-VS-A954	CESC	4
TCGA-EA-A5O9	CESC	4
TCGA-EK-A2RK	CESC	4
TCGA-JW-A852	CESC	4
TCGA-EK-A3GK	CESC	4
TCGA-VS-A9UI	CESC	4
TCGA-ZJ-AB0I	CESC	4
TCGA-EK-A2RO	CESC	4
TCGA-VS-A8QC	CESC	4
TCGA-W6-AA0S	CHOL	2
TCGA-W5-AA31	CHOL	2
TCGA-ZH-A8Y1	CHOL	2
TCGA-ZD-A8I3	CHOL	1
TCGA-ZH-A8Y2	CHOL	1
TCGA-ZH-A8Y4	CHOL	1
TCGA-W5-AA2X	CHOL	1
TCGA-ZH-A8Y5	CHOL	1
TCGA-W5-AA2T	CHOL	1
TCGA-W5-AA2O	CHOL	1
TCGA-YR-A95A	CHOL	1
TCGA-W5-AA2Q	CHOL	1
TCGA-ZH-A8Y6	CHOL	1
TCGA-W5-AA2H	CHOL	6
TCGA-3X-AAVE	CHOL	6
TCGA-W5-AA2R	CHOL	6
TCGA-3X-AAV9	CHOL	6
TCGA-ZU-A8S4	CHOL	6
TCGA-4G-AAZT	CHOL	6
TCGA-WD-A7RX	CHOL	6
TCGA-W5-AA2G	CHOL	3
TCGA-3X-AAVB	CHOL	3
TCGA-ZH-A8Y8	CHOL	3
TCGA-W5-AA34	CHOL	3
TCGA-W5-AA36	CHOL	3
TCGA-W5-AA2U	CHOL	3
TCGA-W5-AA38	CHOL	3
TCGA-W5-AA2W	CHOL	4
TCGA-W5-AA2I	CHOL	4
TCGA-3X-AAVA	CHOL	4
TCGA-W5-AA39	CHOL	4
TCGA-W5-AA30	CHOL	5
TCGA-W5-AA33	CHOL	5
TCGA-4G-AAZO	CHOL	5
TCGA-3X-AAVC	CHOL	5
TCGA-W5-AA2Z	CHOL	5
TCGA-DC-5869	COREAD	1
TCGA-G4-6294	COREAD	1
TCGA-DC-6682	COREAD	1
TCGA-AY-A69D	COREAD	1
TCGA-EI-6508	COREAD	1
TCGA-A6-5659	COREAD	1
TCGA-CK-5915	COREAD	1
TCGA-QG-A5YV	COREAD	1
TCGA-CM-6166	COREAD	1
TCGA-CL-4957	COREAD	1
TCGA-NH-A50U	COREAD	1
TCGA-A6-6650	COREAD	1
TCGA-CA-6715	COREAD	1
TCGA-CA-5255	COREAD	1
TCGA-DM-A0XD	COREAD	1
TCGA-AZ-6606	COREAD	1
TCGA-DY-A1DG	COREAD	1
TCGA-AD-6888	COREAD	1
TCGA-F4-6808	COREAD	1
TCGA-F5-6810	COREAD	1
TCGA-AA-A02K	COREAD	1
TCGA-AY-A8YK	COREAD	1
TCGA-AH-6903	COREAD	1
TCGA-CM-6172	COREAD	1
TCGA-AF-6136	COREAD	1
TCGA-3L-AA1B	COREAD	1
TCGA-DC-6157	COREAD	1
TCGA-5M-AATE	COREAD	1
TCGA-A6-6648	COREAD	1
TCGA-AH-6549	COREAD	1
TCGA-CL-5917	COREAD	1
TCGA-A6-5662	COREAD	1
TCGA-A6-A56B	COREAD	1
TCGA-QG-A5Z1	COREAD	1
TCGA-EI-6509	COREAD	1
TCGA-G4-6303	COREAD	1
TCGA-AD-6965	COREAD	1
TCGA-CK-5912	COREAD	1
TCGA-D5-6538	COREAD	1
TCGA-CA-6716	COREAD	1
TCGA-D5-6532	COREAD	1
TCGA-SS-A7HO	COREAD	1
TCGA-G4-6298	COREAD	1
TCGA-A6-6652	COREAD	1
TCGA-DM-A28C	COREAD	1
TCGA-RU-A8FL	COREAD	1
TCGA-AH-6897	COREAD	1
TCGA-CM-5868	COREAD	1
TCGA-F5-6861	COREAD	1
TCGA-A6-5656	COREAD	1
TCGA-AF-5654	COREAD	1
TCGA-DM-A282	COREAD	1
TCGA-DC-4749	COREAD	1
TCGA-AH-6544	COREAD	1
TCGA-QG-A5YX	COREAD	1
TCGA-F5-6863	COREAD	1
TCGA-DM-A1D0	COREAD	1
TCGA-DM-A28H	COREAD	1
TCGA-5M-AAT4	COREAD	1
TCGA-NH-A50T	COREAD	1
TCGA-AY-A54L	COREAD	1
TCGA-DM-A1D9	COREAD	1
TCGA-DM-A28E	COREAD	1
TCGA-DM-A285	COREAD	1
TCGA-DM-A288	COREAD	1
TCGA-DM-A28G	COREAD	1
TCGA-4N-A93T	COREAD	1
TCGA-CM-4747	COREAD	1
TCGA-4T-AA8H	COREAD	1
TCGA-AY-A71X	COREAD	1
TCGA-G5-6641	COREAD	1
TCGA-AA-A01Z	COREAD	1
TCGA-DM-A1D6	COREAD	1
TCGA-DM-A28K	COREAD	1
TCGA-G4-6315	COREAD	2
TCGA-G4-6317	COREAD	2
TCGA-DM-A1D7	COREAD	2
TCGA-G4-6307	COREAD	2
TCGA-G4-6626	COREAD	2
TCGA-DM-A1D8	COREAD	2
TCGA-5M-AAT5	COREAD	2
TCGA-NH-A8F7	COREAD	2
TCGA-AZ-4682	COREAD	2
TCGA-DM-A28M	COREAD	2
TCGA-AZ-4313	COREAD	2
TCGA-CM-5861	COREAD	2
TCGA-AD-A5EK	COREAD	2
TCGA-DM-A1DB	COREAD	2
TCGA-DM-A1D4	COREAD	2
TCGA-DM-A28F	COREAD	2
TCGA-DY-A1H8	COREAD	2
TCGA-DM-A1DA	COREAD	2
TCGA-DM-A28A	COREAD	2
TCGA-T9-A92H	COREAD	2
TCGA-G4-6320	COREAD	2
TCGA-NH-A6GC	COREAD	2
TCGA-DY-A1DD	COREAD	2
TCGA-DY-A1DF	COREAD	2
[truncated: 7,175 more rows]
