# Supplementary material for: A Pan-cancer Landscape of Interactions between Solid Tumors and Infiltrating Immune Cell Populations
Source: Oxford University Press journal article supplement (doi:10.1158/1078-0432.ccr-17-3509), 2018-04-17
Supplement: 10780432ccr173509-sup-192911_3_supp_4675339_p6rxmz.xls [file 10780432ccr173509-sup-192911_3_supp_4675339_p6rxmz.xls]

## Sheet: Sheet1
event	cancer_type	immune_cell	regression_coefficient	regression_pval
ABCB1_mut	GBM	Activated CD8 T cell	0.113506	0.461528
ABCB1_mut	GBM	aDC	0.254015	0.15922
ABCB1_mut	GBM	B cells	0.127376	0.187889
ABCB1_mut	GBM	Eosinophils	0.119739	0.0944263
ABCB1_mut	GBM	Gamma delta T cell	0.0247716	0.827355
ABCB1_mut	GBM	iDC	0.0926467	0.388891
ABCB1_mut	GBM	Macrophages	-0.075861	0.604797
ABCB1_mut	GBM	Mast cells	0.0131081	0.884808
ABCB1_mut	GBM	Neutrophils	0.150636	0.293196
ABCB1_mut	GBM	NK CD56bright cells	-0.0513299	0.656099
ABCB1_mut	GBM	NK CD56dim cells	0.0679972	0.620401
ABCB1_mut	GBM	Regulatory T cell	0.022285	0.890099
ABCB1_mut	GBM	T helper cells	-0.0149034	0.867372
ABCB1_mut	GBM	Tcm cells	-0.031732	0.779811
ABCB1_mut	GBM	Tem cells	-0.0207494	0.876586
ABCB1_mut	GBM	Tfh cells	-0.0571316	0.454253
ACACA_mut	GBM	Activated CD8 T cell	0.0504651	0.801164
ACACA_mut	GBM	aDC	-0.105217	0.654453
ACACA_mut	GBM	B cells	0.0710914	0.572409
ACACA_mut	GBM	Eosinophils	-0.00610004	0.94794
ACACA_mut	GBM	Gamma delta T cell	0.0315017	0.830917
ACACA_mut	GBM	iDC	0.113091	0.418158
ACACA_mut	GBM	Macrophages	-0.0963401	0.612876
ACACA_mut	GBM	Mast cells	0.0449723	0.701902
ACACA_mut	GBM	Neutrophils	-0.0831744	0.65548
ACACA_mut	GBM	NK CD56bright cells	-0.0335762	0.822601
ACACA_mut	GBM	NK CD56dim cells	0.23171	0.192745
ACACA_mut	GBM	Regulatory T cell	-0.0125147	0.952363
ACACA_mut	GBM	T helper cells	-0.0240927	0.835348
ACACA_mut	GBM	Tcm cells	0.112828	0.44371
ACACA_mut	GBM	Tem cells	0.141518	0.414316
ACACA_mut	GBM	Tfh cells	-0.120866	0.222182
AKT2_AMP	PAAD	Activated CD8 T cell	-0.0523307	0.567629
AKT2_AMP	PAAD	aDC	0.231666	0.097261
AKT2_AMP	PAAD	B cells	0.137017	0.12506
AKT2_AMP	PAAD	Eosinophils	-0.0158246	0.793959
AKT2_AMP	PAAD	Gamma delta T cell	0.0417149	0.567589
AKT2_AMP	PAAD	iDC	0.136395	0.0789629
AKT2_AMP	PAAD	Macrophages	0.0792619	0.45757
AKT2_AMP	PAAD	Mast cells	0.199961	0.0284901
AKT2_AMP	PAAD	Neutrophils	0.0651838	0.49922
AKT2_AMP	PAAD	NK CD56bright cells	-0.0199971	0.829685
AKT2_AMP	PAAD	NK CD56dim cells	0.231339	0.032843
AKT2_AMP	PAAD	Regulatory T cell	0.208089	0.104876
AKT2_AMP	PAAD	T helper cells	-0.00198512	0.978588
AKT2_AMP	PAAD	Tcm cells	-0.00650013	0.936963
AKT2_AMP	PAAD	Tem cells	0.159694	0.0625753
AKT2_AMP	PAAD	Tfh cells	0.0729762	0.276429
ANK3_mut	PAAD	Activated CD8 T cell	0.451258	0.00541366
ANK3_mut	PAAD	aDC	0.425388	0.0886974
ANK3_mut	PAAD	B cells	0.331463	0.0404573
ANK3_mut	PAAD	Eosinophils	0.00728512	0.94503
ANK3_mut	PAAD	Gamma delta T cell	0.162499	0.208076
ANK3_mut	PAAD	iDC	-0.0226463	0.86875
ANK3_mut	PAAD	Macrophages	0.264082	0.163602
ANK3_mut	PAAD	Mast cells	0.219879	0.189343
ANK3_mut	PAAD	Neutrophils	0.328926	0.0496069
ANK3_mut	PAAD	NK CD56bright cells	-0.171898	0.28313
ANK3_mut	PAAD	NK CD56dim cells	0.195684	0.321129
ANK3_mut	PAAD	Regulatory T cell	0.415323	0.0678039
ANK3_mut	PAAD	T helper cells	0.301658	0.0216746
ANK3_mut	PAAD	Tcm cells	0.252179	0.0760652
ANK3_mut	PAAD	Tem cells	0.0885433	0.564333
ANK3_mut	PAAD	Tfh cells	0.0617405	0.590534
APC_mut	COREAD	Activated CD8 T cell	-0.151712	8.72016e-07
APC_mut	LUAD	Activated CD8 T cell	0.0430667	0.649601
APC_mut	PAN-CANCER	Activated CD8 T cell	-0.0145421	0.359686
APC_mut	COREAD	aDC	-0.199701	2.11768e-05
APC_mut	LUAD	aDC	-0.137352	0.242577
APC_mut	PAN-CANCER	aDC	-0.0748246	0.000234051
APC_mut	COREAD	B cells	-0.0572408	0.0586846
APC_mut	LUAD	B cells	0.0470339	0.615906
APC_mut	PAN-CANCER	B cells	-0.0038769	0.75701
APC_mut	COREAD	Eosinophils	0.0113729	0.582259
APC_mut	LUAD	Eosinophils	-0.0126704	0.80193
APC_mut	PAN-CANCER	Eosinophils	-0.00442937	0.59327
APC_mut	COREAD	Gamma delta T cell	-0.0880253	5.57424e-05
APC_mut	LUAD	Gamma delta T cell	-0.0965088	0.16345
APC_mut	PAN-CANCER	Gamma delta T cell	-0.0177249	0.0881785
APC_mut	COREAD	iDC	-0.130439	2.77887e-06
APC_mut	LUAD	iDC	-0.0163853	0.821567
APC_mut	PAN-CANCER	iDC	-0.0324975	0.00462354
APC_mut	COREAD	Macrophages	-0.157416	1.04339e-05
APC_mut	LUAD	Macrophages	-0.154934	0.103785
APC_mut	PAN-CANCER	Macrophages	-0.0402555	0.00638691
APC_mut	COREAD	Mast cells	-0.0498201	0.138501
APC_mut	LUAD	Mast cells	-0.0401699	0.622334
APC_mut	PAN-CANCER	Mast cells	-0.0159095	0.227297
APC_mut	COREAD	Neutrophils	-0.121949	0.000626621
APC_mut	LUAD	Neutrophils	-0.132503	0.0822835
APC_mut	PAN-CANCER	Neutrophils	-0.0439233	0.00170399
APC_mut	COREAD	NK CD56bright cells	-0.0486667	0.119459
APC_mut	LUAD	NK CD56bright cells	-0.00511013	0.94328
APC_mut	PAN-CANCER	NK CD56bright cells	-0.0114274	0.372283
APC_mut	COREAD	NK CD56dim cells	-0.16178	4.82616e-06
APC_mut	LUAD	NK CD56dim cells	0.0349969	0.710091
APC_mut	PAN-CANCER	NK CD56dim cells	-0.0400796	0.0126584
APC_mut	COREAD	Regulatory T cell	-0.180124	7.9162e-06
APC_mut	LUAD	Regulatory T cell	-0.101597	0.359315
APC_mut	PAN-CANCER	Regulatory T cell	-0.0386259	0.0284587
APC_mut	COREAD	T helper cells	0.0260975	0.358266
APC_mut	LUAD	T helper cells	-0.0136822	0.83179
APC_mut	PAN-CANCER	T helper cells	0.0216475	0.0501535
APC_mut	COREAD	Tcm cells	0.0628188	0.020788
APC_mut	LUAD	Tcm cells	-0.0931937	0.181694
APC_mut	PAN-CANCER	Tcm cells	0.0208098	0.068606
APC_mut	COREAD	Tem cells	-0.0117203	0.686514
APC_mut	LUAD	Tem cells	-0.131545	0.102532
APC_mut	PAN-CANCER	Tem cells	0.00473702	0.702019
APC_mut	COREAD	Tfh cells	-0.0268253	0.252508
APC_mut	LUAD	Tfh cells	0.0332887	0.587174
APC_mut	PAN-CANCER	Tfh cells	-0.00870613	0.33669
ARHGAP35_mut	BLCA	Activated CD8 T cell	-0.139396	0.108681
ARHGAP35_mut	BLCA	aDC	-0.283537	0.0175285
ARHGAP35_mut	BLCA	B cells	-0.0807724	0.253933
ARHGAP35_mut	BLCA	Eosinophils	0.0812624	0.0496626
ARHGAP35_mut	BLCA	Gamma delta T cell	-0.108926	0.0494987
ARHGAP35_mut	BLCA	iDC	-0.138515	0.0179587
ARHGAP35_mut	BLCA	Macrophages	-0.239227	0.00974942
ARHGAP35_mut	BLCA	Mast cells	-0.0554169	0.47665
ARHGAP35_mut	BLCA	Neutrophils	-0.160355	0.0489819
ARHGAP35_mut	BLCA	NK CD56bright cells	0.168745	0.0344832
ARHGAP35_mut	BLCA	NK CD56dim cells	-0.156583	0.0743549
ARHGAP35_mut	BLCA	Regulatory T cell	-0.260716	0.0261877
ARHGAP35_mut	BLCA	T helper cells	-0.00116707	0.984279
ARHGAP35_mut	BLCA	Tcm cells	0.101192	0.07992
ARHGAP35_mut	BLCA	Tem cells	-0.000559945	0.993183
ARHGAP35_mut	BLCA	Tfh cells	0.0592214	0.189382
ARID1A_mut	CESC	Activated CD8 T cell	-0.358138	0.00594423
ARID1A_mut	LIHC	Activated CD8 T cell	0.14723	0.0953436
ARID1A_mut	PAAD	Activated CD8 T cell	0.265544	0.028498
ARID1A_mut	STAD	Activated CD8 T cell	0.192719	3.11024e-05
ARID1A_mut	CESC	aDC	-0.312118	0.066842
ARID1A_mut	LIHC	aDC	0.170008	0.131639
ARID1A_mut	PAAD	aDC	0.205776	0.26944
ARID1A_mut	STAD	aDC	0.213148	0.000614252
ARID1A_mut	CESC	B cells	-0.108143	0.28904
ARID1A_mut	LIHC	B cells	0.0282285	0.642856
ARID1A_mut	PAAD	B cells	0.0837779	0.488824
ARID1A_mut	STAD	B cells	0.0517652	0.20055
ARID1A_mut	CESC	Eosinophils	0.0915194	0.0930037
ARID1A_mut	LIHC	Eosinophils	-0.0356698	0.451702
ARID1A_mut	PAAD	Eosinophils	0.089504	0.253556
ARID1A_mut	STAD	Eosinophils	0.0576769	0.0333484
ARID1A_mut	CESC	Gamma delta T cell	-0.130878	0.0824178
ARID1A_mut	LIHC	Gamma delta T cell	0.135104	0.00782661
ARID1A_mut	PAAD	Gamma delta T cell	0.0863247	0.369067
ARID1A_mut	STAD	Gamma delta T cell	0.00871869	0.780978
ARID1A_mut	CESC	iDC	-0.117215	0.174449
ARID1A_mut	LIHC	iDC	-0.0217801	0.723946
ARID1A_mut	PAAD	iDC	-0.0128898	0.899343
ARID1A_mut	STAD	iDC	0.0207503	0.56597
ARID1A_mut	CESC	Macrophages	-0.144114	0.166256
ARID1A_mut	LIHC	Macrophages	0.106697	0.0993945
ARID1A_mut	PAAD	Macrophages	0.00444209	0.974941
ARID1A_mut	STAD	Macrophages	0.111168	0.015944
ARID1A_mut	CESC	Mast cells	0.0280225	0.774535
ARID1A_mut	LIHC	Mast cells	-0.162657	0.00884405
ARID1A_mut	PAAD	Mast cells	0.168215	0.176803
ARID1A_mut	STAD	Mast cells	0.0597664	0.154653
ARID1A_mut	CESC	Neutrophils	-0.0579546	0.567899
ARID1A_mut	LIHC	Neutrophils	0.0418421	0.546736
ARID1A_mut	PAAD	Neutrophils	0.0364597	0.771178
ARID1A_mut	STAD	Neutrophils	0.0574742	0.186111
ARID1A_mut	CESC	NK CD56bright cells	0.0628158	0.53531
ARID1A_mut	LIHC	NK CD56bright cells	-0.0947145	0.169325
ARID1A_mut	PAAD	NK CD56bright cells	0.0152795	0.8981
ARID1A_mut	STAD	NK CD56bright cells	-0.00327657	0.932738
ARID1A_mut	CESC	NK CD56dim cells	-0.127254	0.28089
ARID1A_mut	LIHC	NK CD56dim cells	0.0937735	0.263239
ARID1A_mut	PAAD	NK CD56dim cells	0.0958065	0.513971
ARID1A_mut	STAD	NK CD56dim cells	0.162385	0.000648216
ARID1A_mut	CESC	Regulatory T cell	-0.254549	0.0646824
ARID1A_mut	LIHC	Regulatory T cell	0.0674906	0.450204
ARID1A_mut	PAAD	Regulatory T cell	0.00873158	0.959047
ARID1A_mut	STAD	Regulatory T cell	0.142512	0.0101519
ARID1A_mut	CESC	T helper cells	0.000469514	0.995535
ARID1A_mut	LIHC	T helper cells	0.132036	0.0425818
ARID1A_mut	PAAD	T helper cells	0.158596	0.106044
ARID1A_mut	STAD	T helper cells	0.099377	0.00673897
ARID1A_mut	CESC	Tcm cells	0.0248886	0.748603
ARID1A_mut	LIHC	Tcm cells	0.0736723	0.216341
ARID1A_mut	PAAD	Tcm cells	0.18004	0.0886414
ARID1A_mut	STAD	Tcm cells	0.056576	0.120066
ARID1A_mut	CESC	Tem cells	0.12455	0.153595
ARID1A_mut	LIHC	Tem cells	-0.0739894	0.280434
ARID1A_mut	PAAD	Tem cells	0.00759664	0.947001
ARID1A_mut	STAD	Tem cells	0.0562643	0.140133
ARID1A_mut	CESC	Tfh cells	0.0138877	0.852994
ARID1A_mut	LIHC	Tfh cells	-0.00314936	0.943291
ARID1A_mut	PAAD	Tfh cells	0.116413	0.171293
ARID1A_mut	STAD	Tfh cells	0.0588148	0.044293
ARID2_mut	PAN-CANCER	Activated CD8 T cell	0.0493522	0.0343299
ARID2_mut	PAN-CANCER	aDC	0.0650194	0.0295844
ARID2_mut	PAN-CANCER	B cells	0.0388051	0.0350014
ARID2_mut	PAN-CANCER	Eosinophils	0.0166627	0.171399
ARID2_mut	PAN-CANCER	Gamma delta T cell	0.0105606	0.489275
ARID2_mut	PAN-CANCER	iDC	0.0488434	0.00376124
ARID2_mut	PAN-CANCER	Macrophages	0.026531	0.221225
ARID2_mut	PAN-CANCER	Mast cells	0.0137033	0.47904
ARID2_mut	PAN-CANCER	Neutrophils	0.0266453	0.195231
ARID2_mut	PAN-CANCER	NK CD56bright cells	0.018075	0.33675
ARID2_mut	PAN-CANCER	NK CD56dim cells	0.0320456	0.174856
ARID2_mut	PAN-CANCER	Regulatory T cell	0.0817953	0.00158561
ARID2_mut	PAN-CANCER	T helper cells	0.0169191	0.297441
ARID2_mut	PAN-CANCER	Tcm cells	0.040307	0.016348
ARID2_mut	PAN-CANCER	Tem cells	0.0016676	0.926952
ARID2_mut	PAN-CANCER	Tfh cells	0.00604037	0.650038
ATRX_mut	ACC	Activated CD8 T cell	-0.00716815	0.964764
ATRX_mut	GBM	Activated CD8 T cell	-0.125912	0.353601
ATRX_mut	LGG	Activated CD8 T cell	-0.0854694	0.00412426
ATRX_mut	LUAD	Activated CD8 T cell	-0.198374	0.0264539
ATRX_mut	PAN-CANCER	Activated CD8 T cell	-0.0293261	0.102737
ATRX_mut	SARC	Activated CD8 T cell	-0.0670655	0.345769
ATRX_mut	ACC	aDC	-0.431257	0.0478151
ATRX_mut	GBM	aDC	-0.0283289	0.859021
ATRX_mut	LGG	aDC	0.0479698	0.16043
ATRX_mut	LUAD	aDC	-0.226892	0.0408161
ATRX_mut	PAN-CANCER	aDC	0.0112789	0.624352
ATRX_mut	SARC	aDC	5.77155e-05	0.999438
ATRX_mut	ACC	B cells	0.0526988	0.687178
ATRX_mut	GBM	B cells	0.0681387	0.424798
ATRX_mut	LGG	B cells	-0.0502627	0.00432125
ATRX_mut	LUAD	B cells	-0.0863002	0.329909
ATRX_mut	PAN-CANCER	B cells	-0.020398	0.150413
ATRX_mut	SARC	B cells	-0.0106099	0.805705
ATRX_mut	ACC	Eosinophils	0.0289421	0.777273
ATRX_mut	GBM	Eosinophils	-0.138703	0.0273408
ATRX_mut	LGG	Eosinophils	-0.0621659	1.77527e-06
ATRX_mut	LUAD	Eosinophils	-0.0224332	0.638371
ATRX_mut	PAN-CANCER	Eosinophils	-0.0288938	0.00208128
ATRX_mut	SARC	Eosinophils	-0.0360412	0.324301
ATRX_mut	ACC	Gamma delta T cell	-0.0540862	0.634051
ATRX_mut	GBM	Gamma delta T cell	-0.0999033	0.317334
ATRX_mut	LGG	Gamma delta T cell	0.0545039	0.0170179
ATRX_mut	LUAD	Gamma delta T cell	-0.129826	0.0470824
ATRX_mut	PAN-CANCER	Gamma delta T cell	0.0287295	0.0146283
ATRX_mut	SARC	Gamma delta T cell	0.0821039	0.0818518
ATRX_mut	ACC	iDC	-0.0437604	0.715004
ATRX_mut	GBM	iDC	-0.140034	0.138389
ATRX_mut	LGG	iDC	-0.0164423	0.424922
ATRX_mut	LUAD	iDC	-0.0734044	0.284781
ATRX_mut	PAN-CANCER	iDC	-0.0132438	0.308048
ATRX_mut	SARC	iDC	0.0245578	0.610229
ATRX_mut	ACC	Macrophages	0.107385	0.420746
ATRX_mut	GBM	Macrophages	-0.238957	0.0628669
ATRX_mut	LGG	Macrophages	0.0524781	0.0498857
ATRX_mut	LUAD	Macrophages	-0.177332	0.0486835
ATRX_mut	PAN-CANCER	Macrophages	0.0129451	0.438618
ATRX_mut	SARC	Macrophages	0.0536981	0.370676
ATRX_mut	ACC	Mast cells	0.205967	0.112446
ATRX_mut	GBM	Mast cells	-0.0825394	0.299599
ATRX_mut	LGG	Mast cells	-0.0968094	5.03088e-07
ATRX_mut	LUAD	Mast cells	-0.148085	0.0542834
ATRX_mut	PAN-CANCER	Mast cells	-0.0308186	0.0388216
ATRX_mut	SARC	Mast cells	-0.0923069	0.0234241
ATRX_mut	ACC	Neutrophils	0.00862811	0.947932
ATRX_mut	GBM	Neutrophils	-0.191424	0.128713
ATRX_mut	LGG	Neutrophils	-0.000791227	0.97671
ATRX_mut	LUAD	Neutrophils	-0.148978	0.0385973
ATRX_mut	PAN-CANCER	Neutrophils	-0.0126065	0.426485
ATRX_mut	SARC	Neutrophils	0.0631335	0.307664
ATRX_mut	ACC	NK CD56bright cells	-0.0557873	0.692838
ATRX_mut	GBM	NK CD56bright cells	-0.0918133	0.365451
ATRX_mut	LGG	NK CD56bright cells	-0.252669	3.49128e-18
ATRX_mut	LUAD	NK CD56bright cells	0.0106592	0.875218
ATRX_mut	PAN-CANCER	NK CD56bright cells	-0.0825904	1.19034e-08
ATRX_mut	SARC	NK CD56bright cells	-0.014769	0.756979
ATRX_mut	ACC	NK CD56dim cells	0.0779207	0.602412
ATRX_mut	GBM	NK CD56dim cells	0.00788961	0.948013
ATRX_mut	LGG	NK CD56dim cells	-0.136962	6.78721e-06
ATRX_mut	LUAD	NK CD56dim cells	-0.194037	0.0288267
ATRX_mut	PAN-CANCER	NK CD56dim cells	0.000205277	0.991002
ATRX_mut	SARC	NK CD56dim cells	0.178118	0.00959844
ATRX_mut	ACC	Regulatory T cell	-0.005568	0.973785
ATRX_mut	GBM	Regulatory T cell	-0.163488	0.248856
ATRX_mut	LGG	Regulatory T cell	0.0675656	0.0181218
ATRX_mut	LUAD	Regulatory T cell	-0.250812	0.0163802
ATRX_mut	PAN-CANCER	Regulatory T cell	0.0222962	0.263996
ATRX_mut	SARC	Regulatory T cell	0.097114	0.183214
ATRX_mut	ACC	T helper cells	0.038561	0.723817
ATRX_mut	GBM	T helper cells	0.247491	0.00136766
ATRX_mut	LGG	T helper cells	0.08079	0.000161422
ATRX_mut	LUAD	T helper cells	0.029896	0.623333
ATRX_mut	PAN-CANCER	T helper cells	0.070208	1.9583e-08
ATRX_mut	SARC	T helper cells	-0.00425006	0.914351
ATRX_mut	ACC	Tcm cells	-0.234311	0.0505644
ATRX_mut	GBM	Tcm cells	0.236376	0.0170381
ATRX_mut	LGG	Tcm cells	0.0925712	3.78111e-05
ATRX_mut	LUAD	Tcm cells	-0.0232077	0.72512
ATRX_mut	PAN-CANCER	Tcm cells	0.0150978	0.243231
ATRX_mut	SARC	Tcm cells	-0.0852166	0.0525044
ATRX_mut	ACC	Tem cells	-0.0178862	0.895363
ATRX_mut	GBM	Tem cells	0.154073	0.18932
ATRX_mut	LGG	Tem cells	0.0535486	0.00873142
ATRX_mut	LUAD	Tem cells	-0.0983196	0.196849
ATRX_mut	PAN-CANCER	Tem cells	0.0156576	0.263949
ATRX_mut	SARC	Tem cells	-0.0240159	0.617702
ATRX_mut	ACC	Tfh cells	0.136756	0.192345
ATRX_mut	GBM	Tfh cells	-0.00564389	0.933188
ATRX_mut	LGG	Tfh cells	-0.00292342	0.823216
ATRX_mut	LUAD	Tfh cells	-0.064458	0.265744
ATRX_mut	PAN-CANCER	Tfh cells	9.22237e-05	0.992828
ATRX_mut	SARC	Tfh cells	0.0380537	0.39126
AURKA_AMP	STAD	Activated CD8 T cell	-0.0723903	0.316165
AURKA_AMP	STAD	aDC	-0.05172	0.596563
AURKA_AMP	STAD	B cells	0.00311377	0.961305
AURKA_AMP	STAD	Eosinophils	-0.038975	0.367768
AURKA_AMP	STAD	Gamma delta T cell	-0.0801361	0.101624
AURKA_AMP	STAD	iDC	0.0941488	0.0951115
AURKA_AMP	STAD	Macrophages	-0.00057489	0.993602
AURKA_AMP	STAD	Mast cells	0.0434052	0.540521
AURKA_AMP	STAD	Neutrophils	-0.0020112	0.976508
AURKA_AMP	STAD	NK CD56bright cells	-0.0269771	0.662259
AURKA_AMP	STAD	NK CD56dim cells	-0.125822	0.0822102
AURKA_AMP	STAD	Regulatory T cell	-0.0318266	0.707544
AURKA_AMP	STAD	T helper cells	-0.0298481	0.611361
AURKA_AMP	STAD	Tcm cells	-0.0217999	0.707963
AURKA_AMP	STAD	Tem cells	-0.0397574	0.507461
AURKA_AMP	STAD	Tfh cells	0.0381223	0.42518
AXIN1_mut	LIHC	Activated CD8 T cell	0.0392526	0.597739
AXIN1_mut	LIHC	aDC	-0.0179714	0.849971
AXIN1_mut	LIHC	B cells	-0.047313	0.355314
AXIN1_mut	LIHC	Eosinophils	-0.0458937	0.249452
AXIN1_mut	LIHC	Gamma delta T cell	0.0341749	0.426005
AXIN1_mut	LIHC	iDC	-0.0708554	0.171443
AXIN1_mut	LIHC	Macrophages	-0.0975791	0.0731224
AXIN1_mut	LIHC	Mast cells	-0.206725	6.87486e-05
AXIN1_mut	LIHC	Neutrophils	-0.192062	0.000921977
AXIN1_mut	LIHC	NK CD56bright cells	-0.144755	0.0122535
AXIN1_mut	LIHC	NK CD56dim cells	-0.0821758	0.243799
AXIN1_mut	LIHC	Regulatory T cell	-0.224469	0.00267073
AXIN1_mut	LIHC	T helper cells	0.0606962	0.268797
AXIN1_mut	LIHC	Tcm cells	-0.027374	0.585341
AXIN1_mut	LIHC	Tem cells	-0.071885	0.212425
AXIN1_mut	LIHC	Tfh cells	-0.0817456	0.0276341
B2M_mut	LUSC	Activated CD8 T cell	0.0235379	0.88242
B2M_mut	PAN-CANCER	Activated CD8 T cell	0.110634	0.00883852
B2M_mut	LUSC	aDC	0.258569	0.192261
B2M_mut	PAN-CANCER	aDC	0.210439	0.000101392
B2M_mut	LUSC	B cells	0.00658601	0.958376
B2M_mut	PAN-CANCER	B cells	0.0328994	0.323947
B2M_mut	LUSC	Eosinophils	-0.185485	0.033164
B2M_mut	PAN-CANCER	Eosinophils	-0.00806179	0.714975
B2M_mut	LUSC	Gamma delta T cell	-0.070814	0.530389
B2M_mut	PAN-CANCER	Gamma delta T cell	0.00616749	0.823645
B2M_mut	LUSC	iDC	-0.225362	0.0781449
B2M_mut	PAN-CANCER	iDC	-0.00149807	0.960892
B2M_mut	LUSC	Macrophages	-0.0469145	0.780145
B2M_mut	PAN-CANCER	Macrophages	0.00947213	0.809542
B2M_mut	LUSC	Mast cells	-0.281179	0.0598115
B2M_mut	PAN-CANCER	Mast cells	-0.09887	0.004815
B2M_mut	LUSC	Neutrophils	-0.117742	0.447069
B2M_mut	PAN-CANCER	Neutrophils	-0.0173477	0.641659
B2M_mut	LUSC	NK CD56bright cells	-0.258658	0.0308602
B2M_mut	PAN-CANCER	NK CD56bright cells	0.0526628	0.122425
B2M_mut	LUSC	NK CD56dim cells	0.345653	0.0374525
B2M_mut	PAN-CANCER	NK CD56dim cells	0.212712	6.57701e-07
B2M_mut	LUSC	Regulatory T cell	0.0136238	0.943663
B2M_mut	PAN-CANCER	Regulatory T cell	0.0638987	0.173376
B2M_mut	LUSC	T helper cells	0.0564209	0.566808
B2M_mut	PAN-CANCER	T helper cells	0.104825	0.00036544
B2M_mut	LUSC	Tcm cells	0.00480129	0.963566
B2M_mut	PAN-CANCER	Tcm cells	0.0686919	0.0239319
B2M_mut	LUSC	Tem cells	0.223516	0.100647
B2M_mut	PAN-CANCER	Tem cells	0.0397993	0.227199
B2M_mut	LUSC	Tfh cells	0.125505	0.159056
B2M_mut	PAN-CANCER	Tfh cells	0.0274952	0.254365
BAP1_mut	UVM	Activated CD8 T cell	0.00258513	0.981928
BAP1_mut	UVM	aDC	-0.150481	0.322774
BAP1_mut	UVM	B cells	-0.097084	0.131894
BAP1_mut	UVM	Eosinophils	-0.0154794	0.797096
BAP1_mut	UVM	Gamma delta T cell	-0.0128426	0.834261
BAP1_mut	UVM	iDC	-0.0873036	0.387237
BAP1_mut	UVM	Macrophages	0.0656027	0.448669
BAP1_mut	UVM	Mast cells	0.15357	0.0287077
BAP1_mut	UVM	Neutrophils	0.0272198	0.759076
BAP1_mut	UVM	NK CD56bright cells	0.0406384	0.642412
BAP1_mut	UVM	NK CD56dim cells	0.0633051	0.628363
BAP1_mut	UVM	Regulatory T cell	-0.0684597	0.553554
BAP1_mut	UVM	T helper cells	0.0657327	0.504478
BAP1_mut	UVM	Tcm cells	0.0186144	0.853506
BAP1_mut	UVM	Tem cells	-0.039223	0.638191
BAP1_mut	UVM	Tfh cells	0.0485008	0.521076
BMPR2_mut	STAD	Activated CD8 T cell	0.0966947	0.242494
BMPR2_mut	STAD	aDC	-0.104503	0.346085
BMPR2_mut	STAD	B cells	-0.00379011	0.957823
BMPR2_mut	STAD	Eosinophils	0.103289	0.03134
BMPR2_mut	STAD	Gamma delta T cell	0.0690341	0.213212
BMPR2_mut	STAD	iDC	0.0521934	0.414645
BMPR2_mut	STAD	Macrophages	0.152073	0.0629262
BMPR2_mut	STAD	Mast cells	0.0775109	0.297371
BMPR2_mut	STAD	Neutrophils	0.0773846	0.314823
BMPR2_mut	STAD	NK CD56bright cells	-0.0241438	0.725336
BMPR2_mut	STAD	NK CD56dim cells	0.095932	0.258134
BMPR2_mut	STAD	Regulatory T cell	0.13602	0.167009
BMPR2_mut	STAD	T helper cells	0.110147	0.0907085
BMPR2_mut	STAD	Tcm cells	-0.0162974	0.800594
BMPR2_mut	STAD	Tem cells	0.0685747	0.310111
BMPR2_mut	STAD	Tfh cells	0.0262957	0.61232
BRAF_mut	PAN-CANCER	Activated CD8 T cell	0.0337323	0.0183628
BRAF_mut	THCA	Activated CD8 T cell	0.0624168	0.0705153
BRAF_mut	PAN-CANCER	aDC	0.099851	5.00738e-08
BRAF_mut	THCA	aDC	0.405409	2.57552e-23
BRAF_mut	PAN-CANCER	B cells	-0.0171734	0.12823
BRAF_mut	THCA	B cells	-0.0934903	0.000110406
BRAF_mut	PAN-CANCER	Eosinophils	0.00409395	0.5838
BRAF_mut	THCA	Eosinophils	0.0216787	0.182817
BRAF_mut	PAN-CANCER	Gamma delta T cell	0.0607794	8.25864e-11
BRAF_mut	THCA	Gamma delta T cell	0.198387	6.77027e-18
BRAF_mut	PAN-CANCER	iDC	0.0474274	4.46075e-06
BRAF_mut	THCA	iDC	0.139969	2.07617e-10
BRAF_mut	PAN-CANCER	Macrophages	0.101553	2.06878e-14
BRAF_mut	THCA	Macrophages	0.376532	1.45098e-32
BRAF_mut	PAN-CANCER	Mast cells	0.0191472	0.106832
BRAF_mut	THCA	Mast cells	0.0445378	0.0820061
BRAF_mut	PAN-CANCER	Neutrophils	0.0513972	4.59904e-05
BRAF_mut	THCA	Neutrophils	0.192619	3.45973e-11
BRAF_mut	PAN-CANCER	NK CD56bright cells	0.0207453	0.0722387
BRAF_mut	THCA	NK CD56bright cells	0.059694	0.0281173
BRAF_mut	PAN-CANCER	NK CD56dim cells	-0.00177189	0.90266
BRAF_mut	THCA	NK CD56dim cells	-0.086015	0.00918718
BRAF_mut	PAN-CANCER	Regulatory T cell	0.0882363	2.72364e-08
BRAF_mut	THCA	Regulatory T cell	0.310973	1.20905e-17
BRAF_mut	PAN-CANCER	T helper cells	0.0318856	0.00136362
BRAF_mut	THCA	T helper cells	0.0854416	8.62124e-05
BRAF_mut	PAN-CANCER	Tcm cells	0.0378922	0.000232457
BRAF_mut	THCA	Tcm cells	0.139396	1.63935e-09
BRAF_mut	PAN-CANCER	Tem cells	-0.00373521	0.737778
BRAF_mut	THCA	Tem cells	0.0137485	0.554202
BRAF_mut	PAN-CANCER	Tfh cells	-0.0112526	0.168183
BRAF_mut	THCA	Tfh cells	-0.123495	2.0616e-10
CASP8_mut	CESC	Activated CD8 T cell	0.297704	0.0298732
CASP8_mut	HNSC	Activated CD8 T cell	0.294026	3.44036e-07
CASP8_mut	PAN-CANCER	Activated CD8 T cell	0.162201	4.79858e-08
CASP8_mut	CESC	aDC	0.382635	0.0322175
CASP8_mut	HNSC	aDC	0.330113	2.3663e-05
CASP8_mut	PAN-CANCER	aDC	0.158031	3.34457e-05
CASP8_mut	CESC	B cells	0.0296343	0.782257
CASP8_mut	HNSC	B cells	0.0786151	0.0838851
CASP8_mut	PAN-CANCER	B cells	0.05125	0.0289742
CASP8_mut	CESC	Eosinophils	0.0130579	0.819926
CASP8_mut	HNSC	Eosinophils	-0.0324096	0.26787
CASP8_mut	PAN-CANCER	Eosinophils	-0.0125002	0.421002
CASP8_mut	CESC	Gamma delta T cell	0.185911	0.0185495
CASP8_mut	HNSC	Gamma delta T cell	0.209136	3.30045e-08
CASP8_mut	PAN-CANCER	Gamma delta T cell	0.0872875	7.29713e-06
CASP8_mut	CESC	iDC	0.146259	0.106397
CASP8_mut	HNSC	iDC	0.0409841	0.349242
CASP8_mut	PAN-CANCER	iDC	0.0369587	0.0855681
CASP8_mut	CESC	Macrophages	0.191103	0.0801701
CASP8_mut	HNSC	Macrophages	0.156744	0.00384414
CASP8_mut	PAN-CANCER	Macrophages	0.122956	8.64567e-06
CASP8_mut	CESC	Mast cells	-0.0157237	0.878372
CASP8_mut	HNSC	Mast cells	-0.0952127	0.0932267
CASP8_mut	PAN-CANCER	Mast cells	-0.017846	0.46969
CASP8_mut	CESC	Neutrophils	0.217255	0.0407846
CASP8_mut	HNSC	Neutrophils	0.139375	0.00835352
CASP8_mut	PAN-CANCER	Neutrophils	0.110079	2.68504e-05
CASP8_mut	CESC	NK CD56bright cells	0.134112	0.207095
CASP8_mut	HNSC	NK CD56bright cells	-0.079937	0.0410279
CASP8_mut	PAN-CANCER	NK CD56bright cells	-0.0460083	0.0551333
CASP8_mut	CESC	NK CD56dim cells	0.256445	0.0379919
CASP8_mut	HNSC	NK CD56dim cells	0.253494	1.25293e-05
CASP8_mut	PAN-CANCER	NK CD56dim cells	0.168142	2.2986e-08
CASP8_mut	CESC	Regulatory T cell	0.244261	0.091575
CASP8_mut	HNSC	Regulatory T cell	0.227641	0.000344586
CASP8_mut	PAN-CANCER	Regulatory T cell	0.177273	7.80356e-08
CASP8_mut	CESC	T helper cells	-0.0493224	0.575501
CASP8_mut	HNSC	T helper cells	0.0262552	0.473208
CASP8_mut	PAN-CANCER	T helper cells	0.0876263	2.29293e-05
CASP8_mut	CESC	Tcm cells	0.0150151	0.853946
CASP8_mut	HNSC	Tcm cells	0.00974852	0.788943
CASP8_mut	PAN-CANCER	Tcm cells	0.0446716	0.0368951
CASP8_mut	CESC	Tem cells	0.029138	0.751005
CASP8_mut	HNSC	Tem cells	0.0191534	0.689792
CASP8_mut	PAN-CANCER	Tem cells	0.0421991	0.0688054
CASP8_mut	CESC	Tfh cells	0.0340071	0.665665
CASP8_mut	HNSC	Tfh cells	-0.00702536	0.849404
CASP8_mut	PAN-CANCER	Tfh cells	0.00178689	0.916166
CCND1_AMP	BLCA	Activated CD8 T cell	0.0319653	0.554508
CCND1_AMP	BLCA	aDC	0.0688387	0.350413
CCND1_AMP	BLCA	B cells	-0.019125	0.659382
CCND1_AMP	BLCA	Eosinophils	0.0229353	0.372517
CCND1_AMP	BLCA	Gamma delta T cell	0.0325175	0.338059
CCND1_AMP	BLCA	iDC	0.00856934	0.811669
CCND1_AMP	BLCA	Macrophages	-0.00269788	0.962299
CCND1_AMP	BLCA	Mast cells	0.0399543	0.406124
CCND1_AMP	BLCA	Neutrophils	-0.0329645	0.50899
CCND1_AMP	BLCA	NK CD56bright cells	0.117319	0.0156818
CCND1_AMP	BLCA	NK CD56dim cells	0.0030086	0.955808
CCND1_AMP	BLCA	Regulatory T cell	-0.025253	0.726682
CCND1_AMP	BLCA	T helper cells	0.0474893	0.180844
CCND1_AMP	BLCA	Tcm cells	0.0417076	0.234844
CCND1_AMP	BLCA	Tem cells	0.0446518	0.267699
CCND1_AMP	BLCA	Tfh cells	0.0187594	0.493184
CCND2_AMP	LGG	Activated CD8 T cell	-0.00315131	0.961289
CCND2_AMP	LGG	aDC	0.0234036	0.748674
CCND2_AMP	LGG	B cells	0.00488015	0.896981
CCND2_AMP	LGG	Eosinophils	-0.0261057	0.35539
CCND2_AMP	LGG	Gamma delta T cell	0.0636403	0.196239
CCND2_AMP	LGG	iDC	-0.0196493	0.65845
CCND2_AMP	LGG	Macrophages	-0.0165188	0.774967
CCND2_AMP	LGG	Mast cells	-0.0728964	0.0818336
CCND2_AMP	LGG	Neutrophils	0.0110105	0.851441
CCND2_AMP	LGG	NK CD56bright cells	-0.122557	0.044327
CCND2_AMP	LGG	NK CD56dim cells	0.0144679	0.83028
CCND2_AMP	LGG	Regulatory T cell	-0.031822	0.604341
CCND2_AMP	LGG	T helper cells	0.0330202	0.471879
CCND2_AMP	LGG	Tcm cells	-0.0161516	0.741783
CCND2_AMP	LGG	Tem cells	0.00174797	0.968283
CCND2_AMP	LGG	Tfh cells	-0.00520606	0.85435
CD274_AMP	HNSC	Activated CD8 T cell	0.247175	0.000677619
CD274_AMP	OV	Activated CD8 T cell	0.219541	0.0335248
CD274_AMP	PAN-CANCER	Activated CD8 T cell	0.117873	8.5264e-05
CD274_AMP	HNSC	aDC	0.430203	1.30045e-05
CD274_AMP	OV	aDC	0.335722	0.00747682
CD274_AMP	PAN-CANCER	aDC	0.125993	0.000985301
CD274_AMP	HNSC	B cells	0.082013	0.156413
CD274_AMP	OV	B cells	0.106273	0.114647
CD274_AMP	PAN-CANCER	B cells	0.0552998	0.0183517
CD274_AMP	HNSC	Eosinophils	0.0179296	0.631196
CD274_AMP	OV	Eosinophils	-0.0881273	0.0971724
CD274_AMP	PAN-CANCER	Eosinophils	-0.0531565	0.0006986
CD274_AMP	HNSC	Gamma delta T cell	0.126651	0.00911582
CD274_AMP	OV	Gamma delta T cell	0.0423758	0.476544
CD274_AMP	PAN-CANCER	Gamma delta T cell	0.0339911	0.0839932
CD274_AMP	HNSC	iDC	0.0841708	0.135949
CD274_AMP	OV	iDC	-0.0375805	0.59344
CD274_AMP	PAN-CANCER	iDC	-0.0152189	0.480711
CD274_AMP	HNSC	Macrophages	0.0978121	0.156191
CD274_AMP	OV	Macrophages	0.0952986	0.29827
CD274_AMP	PAN-CANCER	Macrophages	0.0685798	0.0139853
CD274_AMP	HNSC	Mast cells	-0.070185	0.331137
CD274_AMP	OV	Mast cells	0.00136639	0.982582
CD274_AMP	PAN-CANCER	Mast cells	-0.082781	0.000850039
CD274_AMP	HNSC	Neutrophils	0.0612719	0.357702
CD274_AMP	OV	Neutrophils	0.182175	0.0396134
CD274_AMP	PAN-CANCER	Neutrophils	0.051114	0.0529153
CD274_AMP	HNSC	NK CD56bright cells	-0.0622807	0.213126
CD274_AMP	OV	NK CD56bright cells	-0.0687005	0.360483
CD274_AMP	PAN-CANCER	NK CD56bright cells	-0.0340857	0.155634
CD274_AMP	HNSC	NK CD56dim cells	0.257764	0.000373839
CD274_AMP	OV	NK CD56dim cells	0.210027	0.0401706
CD274_AMP	PAN-CANCER	NK CD56dim cells	0.123155	4.40044e-05
CD274_AMP	HNSC	Regulatory T cell	0.173217	0.0335775
CD274_AMP	OV	Regulatory T cell	0.212952	0.0606085
CD274_AMP	PAN-CANCER	Regulatory T cell	0.0841739	0.0113018
CD274_AMP	HNSC	T helper cells	0.0265596	0.568665
CD274_AMP	OV	T helper cells	0.0305047	0.615924
CD274_AMP	PAN-CANCER	T helper cells	0.0620785	0.00276368
CD274_AMP	HNSC	Tcm cells	-0.0266507	0.565072
CD274_AMP	OV	Tcm cells	0.045044	0.498934
CD274_AMP	PAN-CANCER	Tcm cells	-0.0159556	0.455663
CD274_AMP	HNSC	Tem cells	-0.0387729	0.528911
CD274_AMP	OV	Tem cells	0.0337913	0.682381
CD274_AMP	PAN-CANCER	Tem cells	0.000263504	0.991052
CD274_AMP	HNSC	Tfh cells	0.0956606	0.0429191
CD274_AMP	OV	Tfh cells	0.0124529	0.824042
CD274_AMP	PAN-CANCER	Tfh cells	0.0117195	0.494442
CDH1_mut	BRCA	Activated CD8 T cell	0.0395629	0.258301
CDH1_mut	STAD	Activated CD8 T cell	0.10563	0.152485
CDH1_mut	BRCA	aDC	-0.0155908	0.711893
CDH1_mut	STAD	aDC	0.0864962	0.38239
CDH1_mut	BRCA	B cells	0.118451	7.58349e-05
CDH1_mut	STAD	B cells	0.246465	0.000100654
CDH1_mut	BRCA	Eosinophils	0.104753	3.67838e-08
CDH1_mut	STAD	Eosinophils	0.0761348	0.0757652
CDH1_mut	BRCA	Gamma delta T cell	0.0160196	0.499935
CDH1_mut	STAD	Gamma delta T cell	0.067511	0.172612
CDH1_mut	BRCA	iDC	0.105479	9.88698e-06
CDH1_mut	STAD	iDC	0.100715	0.0774006
CDH1_mut	BRCA	Macrophages	0.00109736	0.973414
CDH1_mut	STAD	Macrophages	0.255888	0.000423396
CDH1_mut	BRCA	Mast cells	0.225394	1.16389e-14
CDH1_mut	STAD	Mast cells	0.198075	0.00271908
CDH1_mut	BRCA	Neutrophils	0.104004	0.000449557
CDH1_mut	STAD	Neutrophils	0.142388	0.0378914
CDH1_mut	BRCA	NK CD56bright cells	0.131432	9.92697e-07
CDH1_mut	STAD	NK CD56bright cells	-0.107888	0.078083
CDH1_mut	BRCA	NK CD56dim cells	0.0415841	0.241434
CDH1_mut	STAD	NK CD56dim cells	0.129524	0.0868925
CDH1_mut	BRCA	Regulatory T cell	0.0309339	0.404293
CDH1_mut	STAD	Regulatory T cell	0.269402	0.00206682
CDH1_mut	BRCA	T helper cells	-0.0467531	0.0574087
CDH1_mut	STAD	T helper cells	-0.034965	0.548117
CDH1_mut	BRCA	Tcm cells	0.0196003	0.444791
CDH1_mut	STAD	Tcm cells	0.0539534	0.34869
CDH1_mut	BRCA	Tem cells	0.106895	2.79354e-05
CDH1_mut	STAD	Tem cells	0.145002	0.0158943
CDH1_mut	BRCA	Tfh cells	0.0658149	0.000102606
CDH1_mut	STAD	Tfh cells	0.137442	0.0028527
CDK6_AMP	PAAD	Activated CD8 T cell	-0.187208	0.088139
CDK6_AMP	PAAD	aDC	-0.309842	0.0652688
CDK6_AMP	PAAD	B cells	0.0387544	0.719773
CDK6_AMP	PAAD	Eosinophils	-0.0452386	0.535121
CDK6_AMP	PAAD	Gamma delta T cell	-0.139038	0.11231
CDK6_AMP	PAAD	iDC	-0.158566	0.0900963
CDK6_AMP	PAAD	Macrophages	-0.187709	0.14301
CDK6_AMP	PAAD	Mast cells	-0.17497	0.113003
CDK6_AMP	PAAD	Neutrophils	-0.0904936	0.43597
CDK6_AMP	PAAD	NK CD56bright cells	0.203425	0.0676504
CDK6_AMP	PAAD	NK CD56dim cells	-0.203541	0.120454
CDK6_AMP	PAAD	Regulatory T cell	-0.318599	0.0387029
CDK6_AMP	PAAD	T helper cells	-0.0265955	0.765269
CDK6_AMP	PAAD	Tcm cells	0.0918565	0.352747
CDK6_AMP	PAAD	Tem cells	0.00543307	0.958309
CDK6_AMP	PAAD	Tfh cells	-0.0442692	0.584192
CDKN2A_DEL	LIHC	Activated CD8 T cell	0.00120311	0.988627
CDKN2A_DEL	MESO	Activated CD8 T cell	-0.181492	0.0309864
CDKN2A_DEL	PAAD	Activated CD8 T cell	-0.0840944	0.120259
CDKN2A_DEL	LIHC	aDC	-0.0216229	0.837626
CDKN2A_DEL	MESO	aDC	-0.356293	0.000832128
CDKN2A_DEL	PAAD	aDC	-0.121049	0.144648
CDKN2A_DEL	LIHC	B cells	-0.0367003	0.531295
CDKN2A_DEL	MESO	B cells	-0.0839391	0.23148
CDKN2A_DEL	PAAD	B cells	-0.114916	0.0294556
CDKN2A_DEL	LIHC	Eosinophils	-0.0566076	0.208787
CDKN2A_DEL	MESO	Eosinophils	-0.0524149	0.250252
CDKN2A_DEL	PAAD	Eosinophils	0.0235392	0.512355
CDKN2A_DEL	LIHC	Gamma delta T cell	0.0153251	0.752403
CDKN2A_DEL	MESO	Gamma delta T cell	-0.04788	0.242522
CDKN2A_DEL	PAAD	Gamma delta T cell	-0.0238234	0.582217
CDKN2A_DEL	LIHC	iDC	-0.0359609	0.543775
CDKN2A_DEL	MESO	iDC	0.00754376	0.886816
CDKN2A_DEL	PAAD	iDC	-0.0250062	0.589116
CDKN2A_DEL	LIHC	Macrophages	-0.119251	0.0554116
CDKN2A_DEL	MESO	Macrophages	-0.00158756	0.980556
CDKN2A_DEL	PAAD	Macrophages	-0.0159734	0.800975
CDKN2A_DEL	LIHC	Mast cells	-0.117297	0.0496456
CDKN2A_DEL	MESO	Mast cells	-0.105975	0.0637392
CDKN2A_DEL	PAAD	Mast cells	-0.025333	0.64271
CDKN2A_DEL	LIHC	Neutrophils	-0.144095	0.0305086
CDKN2A_DEL	MESO	Neutrophils	-0.0933706	0.203109
CDKN2A_DEL	PAAD	Neutrophils	-0.0233441	0.683544
CDKN2A_DEL	LIHC	NK CD56bright cells	-0.017105	0.793989
CDKN2A_DEL	MESO	NK CD56bright cells	-0.133364	0.0484068
CDKN2A_DEL	PAAD	NK CD56bright cells	0.0548303	0.319401
CDKN2A_DEL	LIHC	NK CD56dim cells	-0.0584526	0.467852
CDKN2A_DEL	MESO	NK CD56dim cells	-0.187225	0.025672
CDKN2A_DEL	PAAD	NK CD56dim cells	0.0682745	0.291437
CDKN2A_DEL	LIHC	Regulatory T cell	-0.180793	0.0351408
CDKN2A_DEL	MESO	Regulatory T cell	-0.0281081	0.766242
CDKN2A_DEL	PAAD	Regulatory T cell	-0.0298471	0.69632
CDKN2A_DEL	LIHC	T helper cells	0.026603	0.675765
CDKN2A_DEL	MESO	T helper cells	0.0590931	0.308632
CDKN2A_DEL	PAAD	T helper cells	-0.0549425	0.20932
CDKN2A_DEL	LIHC	Tcm cells	0.0331835	0.569563
CDKN2A_DEL	MESO	Tcm cells	-0.0559093	0.37433
CDKN2A_DEL	PAAD	Tcm cells	-0.0125042	0.797616
CDKN2A_DEL	LIHC	Tem cells	-0.0508219	0.441397
CDKN2A_DEL	MESO	Tem cells	-0.102287	0.0842847
CDKN2A_DEL	PAAD	Tem cells	-0.0254576	0.618863
CDKN2A_DEL	LIHC	Tfh cells	-0.0213877	0.623145
CDKN2A_DEL	MESO	Tfh cells	0.13231	0.00600731
CDKN2A_DEL	PAAD	Tfh cells	-0.0899013	0.0228591
CDKN2A_mut	PAAD	Activated CD8 T cell	-0.00876352	0.890712
CDKN2A_mut	PAN-CANCER	Activated CD8 T cell	-0.00253439	0.896399
CDKN2A_mut	PAAD	aDC	0.0573117	0.556197
CDKN2A_mut	PAN-CANCER	aDC	0.0302747	0.224807
CDKN2A_mut	PAAD	B cells	-0.0677676	0.282792
CDKN2A_mut	PAN-CANCER	B cells	-0.0164303	0.284775
CDKN2A_mut	PAAD	Eosinophils	0.00340017	0.933907
CDKN2A_mut	PAN-CANCER	Eosinophils	0.0178799	0.07861
CDKN2A_mut	PAAD	Gamma delta T cell	-0.0346888	0.489419
CDKN2A_mut	PAN-CANCER	Gamma delta T cell	0.00680269	0.593509
CDKN2A_mut	PAAD	iDC	-0.0736687	0.16462
CDKN2A_mut	PAN-CANCER	iDC	-0.00679281	0.629248
CDKN2A_mut	PAAD	Macrophages	-0.0957469	0.193247
CDKN2A_mut	PAN-CANCER	Macrophages	0.00289394	0.872966
CDKN2A_mut	PAAD	Mast cells	-0.121377	0.0611071
CDKN2A_mut	PAN-CANCER	Mast cells	-0.0236678	0.142883
CDKN2A_mut	PAAD	Neutrophils	-0.0582977	0.372322
CDKN2A_mut	PAN-CANCER	Neutrophils	0.0122376	0.475933
CDKN2A_mut	PAAD	NK CD56bright cells	0.0760818	0.220609
CDKN2A_mut	PAN-CANCER	NK CD56bright cells	0.0258593	0.099559
CDKN2A_mut	PAAD	NK CD56dim cells	-0.100643	0.187962
CDKN2A_mut	PAN-CANCER	NK CD56dim cells	0.0138475	0.482337
CDKN2A_mut	PAAD	Regulatory T cell	-0.121284	0.170369
CDKN2A_mut	PAN-CANCER	Regulatory T cell	0.0096896	0.653966
CDKN2A_mut	PAAD	T helper cells	-0.0525891	0.305733
CDKN2A_mut	PAN-CANCER	T helper cells	-0.0169738	0.210327
CDKN2A_mut	PAAD	Tcm cells	0.0272878	0.62253
CDKN2A_mut	PAN-CANCER	Tcm cells	0.0266849	0.0568076
CDKN2A_mut	PAAD	Tem cells	-0.107981	0.0686637
CDKN2A_mut	PAN-CANCER	Tem cells	-0.0271332	0.0738147
CDKN2A_mut	PAAD	Tfh cells	-0.0213076	0.632308
CDKN2A_mut	PAN-CANCER	Tfh cells	-0.0151266	0.173311
CDKN2B_DEL	MESO	Activated CD8 T cell	-0.155201	0.0715452
CDKN2B_DEL	PAAD	Activated CD8 T cell	-0.0857242	0.117737
CDKN2B_DEL	MESO	aDC	-0.336858	0.00204138
CDKN2B_DEL	PAAD	aDC	-0.090714	0.28112
CDKN2B_DEL	MESO	B cells	-0.0303219	0.672718
CDKN2B_DEL	PAAD	B cells	-0.121042	0.0234093
CDKN2B_DEL	MESO	Eosinophils	-0.0405807	0.383279
CDKN2B_DEL	PAAD	Eosinophils	0.0246882	0.49732
CDKN2B_DEL	MESO	Gamma delta T cell	-0.0436306	0.296451
CDKN2B_DEL	PAAD	Gamma delta T cell	-0.0316187	0.470643
CDKN2B_DEL	MESO	iDC	0.00948755	0.860564
CDKN2B_DEL	PAAD	iDC	-0.0296028	0.527627
CDKN2B_DEL	MESO	Macrophages	-0.015651	0.813587
CDKN2B_DEL	PAAD	Macrophages	-0.0180771	0.778118
CDKN2B_DEL	MESO	Mast cells	-0.0698942	0.233225
CDKN2B_DEL	PAAD	Mast cells	-0.0194507	0.725034
CDKN2B_DEL	MESO	Neutrophils	-0.0643345	0.390864
CDKN2B_DEL	PAAD	Neutrophils	-0.0080299	0.889885
CDKN2B_DEL	MESO	NK CD56bright cells	-0.0620471	0.37232
CDKN2B_DEL	PAAD	NK CD56bright cells	0.0607446	0.275776
CDKN2B_DEL	MESO	NK CD56dim cells	-0.159982	0.0626467
CDKN2B_DEL	PAAD	NK CD56dim cells	0.0605718	0.355499
CDKN2B_DEL	MESO	Regulatory T cell	-0.0268752	0.780314
CDKN2B_DEL	PAAD	Regulatory T cell	-0.0299303	0.69909
CDKN2B_DEL	MESO	T helper cells	0.0417427	0.481152
CDKN2B_DEL	PAAD	T helper cells	-0.0536806	0.225807
CDKN2B_DEL	MESO	Tcm cells	-0.062894	0.326506
CDKN2B_DEL	PAAD	Tcm cells	0.00558529	0.909937
CDKN2B_DEL	MESO	Tem cells	-0.0593532	0.328789
CDKN2B_DEL	PAAD	Tem cells	-0.0287341	0.579155
CDKN2B_DEL	MESO	Tfh cells	0.153552	0.00161919
CDKN2B_DEL	PAAD	Tfh cells	-0.0846864	0.0344584
CHD8_mut	CESC	Activated CD8 T cell	-0.0274251	0.860235
CHD8_mut	GBM	Activated CD8 T cell	0.118166	0.458648
CHD8_mut	CESC	aDC	-0.143492	0.479429
CHD8_mut	GBM	aDC	0.0966167	0.605751
CHD8_mut	CESC	B cells	0.104922	0.386862
CHD8_mut	GBM	B cells	0.0644545	0.520373
CHD8_mut	CESC	Eosinophils	0.0257509	0.69153
CHD8_mut	GBM	Eosinophils	-0.00580316	0.937828
CHD8_mut	CESC	Gamma delta T cell	0.154625	0.0842241
CHD8_mut	GBM	Gamma delta T cell	0.14374	0.220052
CHD8_mut	CESC	iDC	0.1092	0.287339
CHD8_mut	GBM	iDC	0.0146281	0.895491
CHD8_mut	CESC	Macrophages	0.0306638	0.804555
CHD8_mut	GBM	Macrophages	0.0258516	0.864678
CHD8_mut	CESC	Mast cells	-0.0344036	0.767277
CHD8_mut	GBM	Mast cells	0.15395	0.0984657
CHD8_mut	CESC	Neutrophils	0.0475085	0.693631
CHD8_mut	GBM	Neutrophils	0.228456	0.122488
CHD8_mut	CESC	NK CD56bright cells	0.0635136	0.597908
CHD8_mut	GBM	NK CD56bright cells	0.0700363	0.556853
CHD8_mut	CESC	NK CD56dim cells	0.241312	0.0847973
CHD8_mut	GBM	NK CD56dim cells	0.0294867	0.83557
CHD8_mut	CESC	Regulatory T cell	0.0253609	0.877278
CHD8_mut	GBM	Regulatory T cell	0.104225	0.53188
CHD8_mut	CESC	T helper cells	-0.143468	0.149363
CHD8_mut	GBM	T helper cells	0.00925405	0.920152
CHD8_mut	CESC	Tcm cells	-0.0966156	0.294715
CHD8_mut	GBM	Tcm cells	0.118916	0.310379
CHD8_mut	CESC	Tem cells	0.183669	0.0763113
CHD8_mut	GBM	Tem cells	0.120661	0.382054
CHD8_mut	CESC	Tfh cells	0.0142283	0.873075
CHD8_mut	GBM	Tfh cells	-0.010951	0.889808
CHEK2_mut	PCPG	Activated CD8 T cell	0.0886313	0.498192
CHEK2_mut	PCPG	aDC	0.0330816	0.831378
CHEK2_mut	PCPG	B cells	0.057567	0.536776
CHEK2_mut	PCPG	Eosinophils	-0.00641876	0.918323
CHEK2_mut	PCPG	Gamma delta T cell	0.121648	0.167447
CHEK2_mut	PCPG	iDC	0.0920365	0.324236
CHEK2_mut	PCPG	Macrophages	0.121708	0.308034
CHEK2_mut	PCPG	Mast cells	0.0765201	0.393421
CHEK2_mut	PCPG	Neutrophils	0.144732	0.231242
CHEK2_mut	PCPG	NK CD56bright cells	-0.210602	0.04953
CHEK2_mut	PCPG	NK CD56dim cells	0.128341	0.358947
CHEK2_mut	PCPG	Regulatory T cell	0.0622762	0.649141
CHEK2_mut	PCPG	T helper cells	-0.0657214	0.35056
CHEK2_mut	PCPG	Tcm cells	-0.0663164	0.421543
CHEK2_mut	PCPG	Tem cells	-0.108002	0.272611
CHEK2_mut	PCPG	Tfh cells	-0.0526167	0.442564
CIC_mut	LGG	Activated CD8 T cell	-0.0343981	0.332709
CIC_mut	PAN-CANCER	Activated CD8 T cell	0.0398899	0.0851677
CIC_mut	LGG	aDC	-0.193033	1.53872e-06
CIC_mut	PAN-CANCER	aDC	-0.0429186	0.148373
CIC_mut	LGG	B cells	0.0724174	0.000522437
CIC_mut	PAN-CANCER	B cells	0.0295917	0.10564
CIC_mut	LGG	Eosinophils	0.0661527	1.94188e-05
CIC_mut	PAN-CANCER	Eosinophils	0.00946081	0.434462
CIC_mut	LGG	Gamma delta T cell	-0.154902	7.04862e-09
CIC_mut	PAN-CANCER	Gamma delta T cell	-0.0418987	0.00575007
CIC_mut	LGG	iDC	-0.0734306	0.00258432
CIC_mut	PAN-CANCER	iDC	-0.0277369	0.0977559
CIC_mut	LGG	Macrophages	-0.152615	1.2409e-06
CIC_mut	PAN-CANCER	Macrophages	-0.0169111	0.432591
CIC_mut	LGG	Mast cells	0.0822503	0.000352568
CIC_mut	PAN-CANCER	Mast cells	0.0219461	0.253866
CIC_mut	LGG	Neutrophils	-0.111148	0.000512556
CIC_mut	PAN-CANCER	Neutrophils	-0.0282221	0.167335
CIC_mut	LGG	NK CD56bright cells	0.321606	6.9696e-21
CIC_mut	PAN-CANCER	NK CD56bright cells	0.0950209	3.65095e-07
CIC_mut	LGG	NK CD56dim cells	0.057825	0.112725
CIC_mut	PAN-CANCER	NK CD56dim cells	0.0889683	0.000149097
CIC_mut	LGG	Regulatory T cell	-0.176327	1.52343e-07
CIC_mut	PAN-CANCER	Regulatory T cell	-0.0162658	0.527382
CIC_mut	LGG	T helper cells	-0.0114239	0.655493
CIC_mut	PAN-CANCER	T helper cells	0.0566303	0.000446023
CIC_mut	LGG	Tcm cells	-0.0359016	0.181665
CIC_mut	PAN-CANCER	Tcm cells	-0.00302649	0.856034
CIC_mut	LGG	Tem cells	0.0929951	0.000118066
CIC_mut	PAN-CANCER	Tem cells	0.0484194	0.00736705
CIC_mut	LGG	Tfh cells	0.0691808	6.90671e-06
CIC_mut	PAN-CANCER	Tfh cells	0.0220857	0.0949587
CSDE1_mut	PCPG	Activated CD8 T cell	-0.329588	0.068797
CSDE1_mut	PCPG	aDC	-0.130464	0.545516
CSDE1_mut	PCPG	B cells	-0.353403	0.00583602
CSDE1_mut	PCPG	Eosinophils	-0.00707591	0.935174
CSDE1_mut	PCPG	Gamma delta T cell	-0.16816	0.169757
CSDE1_mut	PCPG	iDC	-0.2772	0.0317545
CSDE1_mut	PCPG	Macrophages	-0.455903	0.00554127
CSDE1_mut	PCPG	Mast cells	-0.202898	0.10252
CSDE1_mut	PCPG	Neutrophils	-0.149567	0.373825
CSDE1_mut	PCPG	NK CD56bright cells	-0.133449	0.372659
CSDE1_mut	PCPG	NK CD56dim cells	-0.0426538	0.826557
CSDE1_mut	PCPG	Regulatory T cell	-0.398809	0.0349337
CSDE1_mut	PCPG	T helper cells	-0.138952	0.154897
CSDE1_mut	PCPG	Tcm cells	0.0951789	0.406509
CSDE1_mut	PCPG	Tem cells	-0.009722	0.943451
CSDE1_mut	PCPG	Tfh cells	-0.205987	0.0295653
CTNNB1_mut	ACC	Activated CD8 T cell	-0.0826293	0.474891
CTNNB1_mut	PAN-CANCER	Activated CD8 T cell	0.00774274	0.721773
CTNNB1_mut	ACC	aDC	0.00772838	0.960901
CTNNB1_mut	PAN-CANCER	aDC	-0.120118	1.6097e-05
CTNNB1_mut	ACC	B cells	-0.0248604	0.790229
CTNNB1_mut	PAN-CANCER	B cells	-0.0494776	0.00392758
CTNNB1_mut	ACC	Eosinophils	-0.0438618	0.547787
CTNNB1_mut	PAN-CANCER	Eosinophils	0.0217658	0.0552929
CTNNB1_mut	ACC	Gamma delta T cell	-0.0442808	0.585029
CTNNB1_mut	PAN-CANCER	Gamma delta T cell	0.032596	0.0220387
CTNNB1_mut	ACC	iDC	-0.0656314	0.442306
CTNNB1_mut	PAN-CANCER	iDC	0.0183929	0.241922
CTNNB1_mut	ACC	Macrophages	-0.234086	0.0122225
CTNNB1_mut	PAN-CANCER	Macrophages	-0.0502485	0.0129342
CTNNB1_mut	ACC	Mast cells	-0.232297	0.0110486
CTNNB1_mut	PAN-CANCER	Mast cells	0.0026373	0.883818
CTNNB1_mut	ACC	Neutrophils	-0.209114	0.0241011
CTNNB1_mut	PAN-CANCER	Neutrophils	-0.0446118	0.0199909
CTNNB1_mut	ACC	NK CD56bright cells	0.0226346	0.822435
CTNNB1_mut	PAN-CANCER	NK CD56bright cells	-0.0433152	0.0135222
CTNNB1_mut	ACC	NK CD56dim cells	-0.0943625	0.376038
CTNNB1_mut	PAN-CANCER	NK CD56dim cells	-0.0115276	0.600616
CTNNB1_mut	ACC	Regulatory T cell	-0.159043	0.185946
CTNNB1_mut	PAN-CANCER	Regulatory T cell	-0.0319629	0.185615
CTNNB1_mut	ACC	T helper cells	-0.0246028	0.75217
CTNNB1_mut	PAN-CANCER	T helper cells	-1.99883e-07	0.999989
CTNNB1_mut	ACC	Tcm cells	-0.00714785	0.934271
CTNNB1_mut	PAN-CANCER	Tcm cells	0.00968023	0.536268
CTNNB1_mut	ACC	Tem cells	0.11814	0.221332
CTNNB1_mut	PAN-CANCER	Tem cells	-0.0314991	0.0631972
CTNNB1_mut	ACC	Tfh cells	-0.108223	0.147881
CTNNB1_mut	PAN-CANCER	Tfh cells	-0.0169345	0.172402
CUL3_mut	KIRP	Activated CD8 T cell	0.0459494	0.691376
CUL3_mut	KIRP	aDC	0.0688093	0.641404
CUL3_mut	KIRP	B cells	-0.00359237	0.961256
CUL3_mut	KIRP	Eosinophils	-0.0287558	0.622443
CUL3_mut	KIRP	Gamma delta T cell	-0.0350692	0.668451
CUL3_mut	KIRP	iDC	-0.088003	0.334262
CUL3_mut	KIRP	Macrophages	-0.171799	0.135223
CUL3_mut	KIRP	Mast cells	-0.207806	0.0516604
CUL3_mut	KIRP	Neutrophils	-0.0633101	0.502241
CUL3_mut	KIRP	NK CD56bright cells	0.0151491	0.85193
CUL3_mut	KIRP	NK CD56dim cells	-0.173795	0.102591
CUL3_mut	KIRP	Regulatory T cell	-0.129044	0.328202
CUL3_mut	KIRP	T helper cells	-0.0318128	0.66974
CUL3_mut	KIRP	Tcm cells	-0.113648	0.179884
CUL3_mut	KIRP	Tem cells	-0.226646	0.0123497
CUL3_mut	KIRP	Tfh cells	-0.00667108	0.894929
DCC_mut	BLCA	Activated CD8 T cell	0.16593	0.0976826
DCC_mut	BLCA	aDC	0.0271158	0.844354
DCC_mut	BLCA	B cells	0.0157781	0.846867
DCC_mut	BLCA	Eosinophils	0.0102109	0.831023
DCC_mut	BLCA	Gamma delta T cell	0.0435586	0.496647
DCC_mut	BLCA	iDC	0.105697	0.118057
DCC_mut	BLCA	Macrophages	-0.0520329	0.627267
DCC_mut	BLCA	Mast cells	0.179285	0.0453684
DCC_mut	BLCA	Neutrophils	-0.0367119	0.696547
DCC_mut	BLCA	NK CD56bright cells	0.186296	0.0429749
DCC_mut	BLCA	NK CD56dim cells	-0.0289656	0.775093
DCC_mut	BLCA	Regulatory T cell	-0.0851452	0.530038
DCC_mut	BLCA	T helper cells	-0.080779	0.236483
DCC_mut	BLCA	Tcm cells	-0.0181475	0.785738
DCC_mut	BLCA	Tem cells	-0.0344131	0.648775
DCC_mut	BLCA	Tfh cells	0.0112041	0.829683
DDX3X_mut	CESC	Activated CD8 T cell	0.120212	0.349021
DDX3X_mut	CESC	aDC	0.227736	0.173014
DDX3X_mut	CESC	B cells	0.102234	0.306503
DDX3X_mut	CESC	Eosinophils	-0.0859048	0.107747
DDX3X_mut	CESC	Gamma delta T cell	0.0642202	0.385505
DDX3X_mut	CESC	iDC	0.00160606	0.984878
DDX3X_mut	CESC	Macrophages	0.139993	0.170055
DDX3X_mut	CESC	Mast cells	-0.00295064	0.975451
DDX3X_mut	CESC	Neutrophils	0.0833407	0.401864
DDX3X_mut	CESC	NK CD56bright cells	0.0629701	0.526031
DDX3X_mut	CESC	NK CD56dim cells	0.131836	0.254294
DDX3X_mut	CESC	Regulatory T cell	0.112923	0.404175
DDX3X_mut	CESC	T helper cells	-0.0625862	0.446308
DDX3X_mut	CESC	Tcm cells	0.0358574	0.637532
DDX3X_mut	CESC	Tem cells	-0.0142602	0.867845
DDX3X_mut	CESC	Tfh cells	0.069561	0.343274
EGFR_AMP	HNSC	Activated CD8 T cell	-0.108284	0.0336566
EGFR_AMP	LGG	Activated CD8 T cell	0.217882	7.36857e-05
EGFR_AMP	HNSC	aDC	-0.225144	0.00114079
EGFR_AMP	LGG	aDC	0.299088	1.19433e-06
EGFR_AMP	HNSC	B cells	-0.0714958	0.076748
EGFR_AMP	LGG	B cells	0.0745527	0.0201459
EGFR_AMP	HNSC	Eosinophils	0.0215144	0.409435
EGFR_AMP	LGG	Eosinophils	0.048016	0.0460994
EGFR_AMP	HNSC	Gamma delta T cell	0.0307704	0.3658
EGFR_AMP	LGG	Gamma delta T cell	0.24578	2.6425e-09
EGFR_AMP	HNSC	iDC	0.0353274	0.3706
EGFR_AMP	LGG	iDC	0.201331	7.13295e-08
EGFR_AMP	HNSC	Macrophages	0.0322037	0.504199
EGFR_AMP	LGG	Macrophages	0.244833	4.88933e-07
EGFR_AMP	HNSC	Mast cells	0.0185781	0.712759
EGFR_AMP	LGG	Mast cells	0.0345834	0.334071
EGFR_AMP	HNSC	Neutrophils	0.0377557	0.417163
EGFR_AMP	LGG	Neutrophils	0.287536	5.4257e-09
EGFR_AMP	HNSC	NK CD56bright cells	-0.0360035	0.302918
EGFR_AMP	LGG	NK CD56bright cells	-0.0704184	0.176415
EGFR_AMP	HNSC	NK CD56dim cells	-0.0776726	0.126733
EGFR_AMP	LGG	NK CD56dim cells	0.202016	0.000416973
EGFR_AMP	HNSC	Regulatory T cell	0.00208327	0.970875
EGFR_AMP	LGG	Regulatory T cell	0.230046	9.27086e-06
EGFR_AMP	HNSC	T helper cells	-0.0447967	0.168338
EGFR_AMP	LGG	T helper cells	-0.116744	0.00276316
EGFR_AMP	HNSC	Tcm cells	-0.0118386	0.714465
EGFR_AMP	LGG	Tcm cells	-0.160473	0.000111018
EGFR_AMP	HNSC	Tem cells	-0.0271808	0.527397
EGFR_AMP	LGG	Tem cells	-0.160964	1.4767e-05
EGFR_AMP	HNSC	Tfh cells	-0.0718793	0.029358
EGFR_AMP	LGG	Tfh cells	-0.060649	0.011955
EGFR_mut	LGG	Activated CD8 T cell	0.211713	0.000366847
EGFR_mut	LUAD	Activated CD8 T cell	-0.0805617	0.176301
EGFR_mut	LGG	aDC	0.193388	0.00451565
EGFR_mut	LUAD	aDC	-0.0610391	0.409178
EGFR_mut	LGG	B cells	0.0132276	0.708208
EGFR_mut	LUAD	B cells	0.0292986	0.619316
EGFR_mut	LGG	Eosinophils	0.0703617	0.00725977
EGFR_mut	LUAD	Eosinophils	-0.0238742	0.452264
EGFR_mut	LGG	Gamma delta T cell	0.166848	0.000243583
EGFR_mut	LUAD	Gamma delta T cell	0.059423	0.172531
EGFR_mut	LGG	iDC	0.154755	0.000155055
EGFR_mut	LUAD	iDC	0.0408517	0.371169
EGFR_mut	LGG	Macrophages	0.233386	1.09906e-05
EGFR_mut	LUAD	Macrophages	0.0562528	0.34814
EGFR_mut	LGG	Mast cells	0.0231274	0.552974
EGFR_mut	LUAD	Mast cells	-0.00625537	0.902956
EGFR_mut	LGG	Neutrophils	0.248352	3.5955e-06
EGFR_mut	LUAD	Neutrophils	-0.0369338	0.441842
EGFR_mut	LGG	NK CD56bright cells	-0.0185442	0.758312
EGFR_mut	LUAD	NK CD56bright cells	-0.102999	0.0222625
EGFR_mut	LGG	NK CD56dim cells	0.0506154	0.409881
EGFR_mut	LUAD	NK CD56dim cells	0.0207968	0.725441
EGFR_mut	LGG	Regulatory T cell	0.155411	0.00648927
EGFR_mut	LUAD	Regulatory T cell	0.0522062	0.453997
EGFR_mut	LGG	T helper cells	-0.180581	2.37092e-05
EGFR_mut	LUAD	T helper cells	-0.12149	0.00259535
EGFR_mut	LGG	Tcm cells	-0.136008	0.00255142
EGFR_mut	LUAD	Tcm cells	-0.11504	0.00859503
EGFR_mut	LGG	Tem cells	-0.166482	4.14712e-05
EGFR_mut	LUAD	Tem cells	-0.0583006	0.250285
EGFR_mut	LGG	Tfh cells	-0.0575596	0.0273803
EGFR_mut	LUAD	Tfh cells	0.0808296	0.0357093
EP300_mut	BLCA	Activated CD8 T cell	0.0561747	0.263346
EP300_mut	CESC	Activated CD8 T cell	0.0141387	0.842282
EP300_mut	HNSC	Activated CD8 T cell	0.298401	7.6139e-06
EP300_mut	LUSC	Activated CD8 T cell	0.0616106	0.509706
EP300_mut	PAN-CANCER	Activated CD8 T cell	0.085019	0.000123567
EP300_mut	STAD	Activated CD8 T cell	0.225751	0.0263734
EP300_mut	BLCA	aDC	0.131442	0.0568409
EP300_mut	CESC	aDC	-0.0363309	0.694779
EP300_mut	HNSC	aDC	0.305103	0.000727034
EP300_mut	LUSC	aDC	0.0599168	0.607215
EP300_mut	PAN-CANCER	aDC	0.0560996	0.048142
EP300_mut	STAD	aDC	0.175157	0.199513
EP300_mut	BLCA	B cells	-0.0115929	0.776925
EP300_mut	CESC	B cells	0.0245167	0.657773
EP300_mut	HNSC	B cells	0.0977559	0.0620903
EP300_mut	LUSC	B cells	-0.0266861	0.718779
EP300_mut	PAN-CANCER	B cells	0.00643014	0.713066
EP300_mut	STAD	B cells	-0.0263691	0.765106
EP300_mut	BLCA	Eosinophils	-0.0508601	0.0333146
EP300_mut	CESC	Eosinophils	-0.0452976	0.125297
EP300_mut	HNSC	Eosinophils	0.0600734	0.074441
EP300_mut	LUSC	Eosinophils	0.0478362	0.350568
EP300_mut	PAN-CANCER	Eosinophils	-0.00944854	0.414246
EP300_mut	STAD	Eosinophils	0.0440839	0.456793
EP300_mut	BLCA	Gamma delta T cell	0.0387234	0.227273
EP300_mut	CESC	Gamma delta T cell	-0.0318804	0.436155
EP300_mut	HNSC	Gamma delta T cell	0.0936069	0.034205
EP300_mut	LUSC	Gamma delta T cell	-0.0335209	0.613111
EP300_mut	PAN-CANCER	Gamma delta T cell	0.0210393	0.146976
EP300_mut	STAD	Gamma delta T cell	0.166692	0.0143886
EP300_mut	BLCA	iDC	-0.0536415	0.113214
EP300_mut	CESC	iDC	-0.0160862	0.731414
EP300_mut	HNSC	iDC	0.0364483	0.470145
EP300_mut	LUSC	iDC	-0.0208584	0.781668
EP300_mut	PAN-CANCER	iDC	-0.0152137	0.342152
EP300_mut	STAD	iDC	0.0996381	0.205786
EP300_mut	BLCA	Macrophages	0.0708319	0.186465
EP300_mut	CESC	Macrophages	-0.0366165	0.517036
EP300_mut	HNSC	Macrophages	0.0746888	0.233637
EP300_mut	LUSC	Macrophages	-0.144951	0.141548
EP300_mut	PAN-CANCER	Macrophages	0.0101032	0.623861
EP300_mut	STAD	Macrophages	0.209553	0.0373439
EP300_mut	BLCA	Mast cells	-0.0622919	0.165577
EP300_mut	CESC	Mast cells	-0.0744847	0.159486
EP300_mut	HNSC	Mast cells	-0.0194734	0.766082
EP300_mut	LUSC	Mast cells	-0.0956839	0.276089
EP300_mut	PAN-CANCER	Mast cells	-0.0527365	0.00412498
EP300_mut	STAD	Mast cells	-0.0587111	0.521742
EP300_mut	BLCA	Neutrophils	0.0250224	0.595562
EP300_mut	CESC	Neutrophils	-0.0931638	0.089616
EP300_mut	HNSC	Neutrophils	0.0580114	0.342284
EP300_mut	LUSC	Neutrophils	-0.0675052	0.457975
EP300_mut	PAN-CANCER	Neutrophils	-0.0189646	0.331798
EP300_mut	STAD	Neutrophils	0.190954	0.0436048
EP300_mut	BLCA	NK CD56bright cells	-0.0249582	0.589108
EP300_mut	CESC	NK CD56bright cells	-0.0861828	0.116004
EP300_mut	HNSC	NK CD56bright cells	-0.0243214	0.590307
EP300_mut	LUSC	NK CD56bright cells	0.0446928	0.526296
EP300_mut	PAN-CANCER	NK CD56bright cells	-0.0156254	0.381998
EP300_mut	STAD	NK CD56bright cells	-0.0654136	0.43943
EP300_mut	BLCA	NK CD56dim cells	0.0684891	0.176878
EP300_mut	CESC	NK CD56dim cells	-0.0427057	0.504725
EP300_mut	HNSC	NK CD56dim cells	0.209687	0.00180471
EP300_mut	LUSC	NK CD56dim cells	0.0173138	0.859469
EP300_mut	PAN-CANCER	NK CD56dim cells	0.0664158	0.00306791
EP300_mut	STAD	NK CD56dim cells	0.232615	0.0256376
EP300_mut	BLCA	Regulatory T cell	0.0852611	0.208941
EP300_mut	CESC	Regulatory T cell	-0.0552983	0.460272
EP300_mut	HNSC	Regulatory T cell	0.204024	0.00549522
EP300_mut	LUSC	Regulatory T cell	-0.101304	0.370755
EP300_mut	PAN-CANCER	Regulatory T cell	0.0347327	0.158057
EP300_mut	STAD	Regulatory T cell	0.320117	0.00806732
EP300_mut	BLCA	T helper cells	0.0594694	0.0815098
EP300_mut	CESC	T helper cells	0.0693391	0.126571
EP300_mut	HNSC	T helper cells	0.11073	0.00844884
EP300_mut	LUSC	T helper cells	-0.0370348	0.522073
EP300_mut	PAN-CANCER	T helper cells	0.0511281	0.000914238
EP300_mut	STAD	T helper cells	0.0837725	0.296696
EP300_mut	BLCA	Tcm cells	-0.00227221	0.945817
EP300_mut	CESC	Tcm cells	0.0181687	0.666056
EP300_mut	HNSC	Tcm cells	0.0539885	0.197937
EP300_mut	LUSC	Tcm cells	-0.0458279	0.457739
EP300_mut	PAN-CANCER	Tcm cells	-0.00649661	0.683754
EP300_mut	STAD	Tcm cells	-0.0268026	0.735888
EP300_mut	BLCA	Tem cells	0.0179469	0.635293
EP300_mut	CESC	Tem cells	-0.00534148	0.910287
EP300_mut	HNSC	Tem cells	0.0975546	0.0772701
EP300_mut	LUSC	Tem cells	0.0931649	0.244315
EP300_mut	PAN-CANCER	Tem cells	0.0239176	0.166248
EP300_mut	STAD	Tem cells	0.075081	0.366932
EP300_mut	BLCA	Tfh cells	0.0270108	0.300137
EP300_mut	CESC	Tfh cells	-0.00101314	0.980108
EP300_mut	HNSC	Tfh cells	0.0674155	0.113398
EP300_mut	LUSC	Tfh cells	-0.0740642	0.15707
EP300_mut	PAN-CANCER	Tfh cells	-0.00049864	0.968548
EP300_mut	STAD	Tfh cells	-0.0741627	0.245506
ERBB2_AMP	CESC	Activated CD8 T cell	-0.316575	0.00106521
ERBB2_AMP	STAD	Activated CD8 T cell	-0.141342	0.00656834
ERBB2_AMP	CESC	aDC	-0.341237	0.00700658
ERBB2_AMP	STAD	aDC	-0.162443	0.0210559
ERBB2_AMP	CESC	B cells	-0.157488	0.0366007
ERBB2_AMP	STAD	B cells	-0.125552	0.00655903
ERBB2_AMP	CESC	Eosinophils	0.0482481	0.245417
ERBB2_AMP	STAD	Eosinophils	0.0171627	0.583425
ERBB2_AMP	CESC	Gamma delta T cell	-0.0882673	0.111806
ERBB2_AMP	STAD	Gamma delta T cell	-0.123155	0.000463652
ERBB2_AMP	CESC	iDC	-0.0807658	0.208705
ERBB2_AMP	STAD	iDC	-0.0484715	0.235039
ERBB2_AMP	CESC	Macrophages	-0.149079	0.0549423
ERBB2_AMP	STAD	Macrophages	-0.143549	0.005384
ERBB2_AMP	CESC	Mast cells	-0.0401359	0.592045
ERBB2_AMP	STAD	Mast cells	-0.0762255	0.136659
ERBB2_AMP	CESC	Neutrophils	-0.0133845	0.860975
ERBB2_AMP	STAD	Neutrophils	-0.0721864	0.143223
ERBB2_AMP	CESC	NK CD56bright cells	0.127748	0.0873895
ERBB2_AMP	STAD	NK CD56bright cells	-0.0588219	0.187297
ERBB2_AMP	CESC	NK CD56dim cells	-0.0972413	0.268169
ERBB2_AMP	STAD	NK CD56dim cells	-0.16461	0.00158362
ERBB2_AMP	CESC	Regulatory T cell	-0.22005	0.031278
ERBB2_AMP	STAD	Regulatory T cell	-0.190333	0.00179549
ERBB2_AMP	CESC	T helper cells	-0.0877542	0.153338
ERBB2_AMP	STAD	T helper cells	-0.0487058	0.251121
ERBB2_AMP	CESC	Tcm cells	-0.0336053	0.548638
ERBB2_AMP	STAD	Tcm cells	-0.00421562	0.920198
ERBB2_AMP	CESC	Tem cells	0.120296	0.0627778
ERBB2_AMP	STAD	Tem cells	-0.0934114	0.030795
ERBB2_AMP	CESC	Tfh cells	0.0276084	0.616497
ERBB2_AMP	STAD	Tfh cells	-0.105171	0.00221445
ERBB3_mut	CESC	Activated CD8 T cell	-0.189255	0.0926424
ERBB3_mut	CESC	aDC	-0.396268	0.00667145
ERBB3_mut	CESC	B cells	-0.0701102	0.424775
ERBB3_mut	CESC	Eosinophils	0.0628734	0.180448
ERBB3_mut	CESC	Gamma delta T cell	-0.106221	0.101611
ERBB3_mut	CESC	iDC	-0.0622525	0.402573
ERBB3_mut	CESC	Macrophages	-0.0662971	0.459955
ERBB3_mut	CESC	Mast cells	-0.0902457	0.283403
ERBB3_mut	CESC	Neutrophils	-0.147181	0.0912458
ERBB3_mut	CESC	NK CD56bright cells	-0.0726219	0.404942
ERBB3_mut	CESC	NK CD56dim cells	-0.123522	0.223869
ERBB3_mut	CESC	Regulatory T cell	-0.188993	0.111332
ERBB3_mut	CESC	T helper cells	-0.0327348	0.650269
ERBB3_mut	CESC	Tcm cells	0.0488206	0.465031
ERBB3_mut	CESC	Tem cells	0.040535	0.59012
ERBB3_mut	CESC	Tfh cells	-0.0030776	0.961953
FANCD2_DEL	KIRC	Activated CD8 T cell	-0.154536	0.0154306
FANCD2_DEL	KIRC	aDC	-0.160148	0.0353304
FANCD2_DEL	KIRC	B cells	-0.0335035	0.412543
FANCD2_DEL	KIRC	Eosinophils	0.0484685	0.0808031
FANCD2_DEL	KIRC	Gamma delta T cell	-0.0595545	0.135898
FANCD2_DEL	KIRC	iDC	-0.0430623	0.260178
FANCD2_DEL	KIRC	Macrophages	-0.180325	0.000858529
FANCD2_DEL	KIRC	Mast cells	0.0422702	0.371008
FANCD2_DEL	KIRC	Neutrophils	0.081558	0.0741371
FANCD2_DEL	KIRC	NK CD56bright cells	-0.128044	0.00559075
FANCD2_DEL	KIRC	NK CD56dim cells	0.0268089	0.667974
FANCD2_DEL	KIRC	Regulatory T cell	-0.0937516	0.110494
FANCD2_DEL	KIRC	T helper cells	-0.0237308	0.573195
FANCD2_DEL	KIRC	Tcm cells	0.0379346	0.399368
FANCD2_DEL	KIRC	Tem cells	0.0561954	0.303776
FANCD2_DEL	KIRC	Tfh cells	0.103609	0.00198375
FAT1_mut	PAN-CANCER	Activated CD8 T cell	0.0287766	0.126465
FAT1_mut	PAN-CANCER	aDC	0.0415154	0.0853486
FAT1_mut	PAN-CANCER	B cells	0.00280445	0.85033
FAT1_mut	PAN-CANCER	Eosinophils	0.00340738	0.729047
FAT1_mut	PAN-CANCER	Gamma delta T cell	0.023213	0.0597474
FAT1_mut	PAN-CANCER	iDC	0.0087841	0.518755
FAT1_mut	PAN-CANCER	Macrophages	0.0176519	0.313436
FAT1_mut	PAN-CANCER	Mast cells	0.000966529	0.950693
FAT1_mut	PAN-CANCER	Neutrophils	0.0142626	0.390504
FAT1_mut	PAN-CANCER	NK CD56bright cells	0.00365323	0.809969
FAT1_mut	PAN-CANCER	NK CD56dim cells	0.0392841	0.0393831
FAT1_mut	PAN-CANCER	Regulatory T cell	0.0297854	0.154377
FAT1_mut	PAN-CANCER	T helper cells	0.0213235	0.103836
FAT1_mut	PAN-CANCER	Tcm cells	0.00683979	0.613866
FAT1_mut	PAN-CANCER	Tem cells	0.00742877	0.612961
FAT1_mut	PAN-CANCER	Tfh cells	-0.00814555	0.448566
FBXW7_mut	CESC	Activated CD8 T cell	-0.0337621	0.629454
FBXW7_mut	HNSC	Activated CD8 T cell	-0.0144961	0.829244
FBXW7_mut	CESC	aDC	-0.159409	0.0796758
FBXW7_mut	HNSC	aDC	-0.217057	0.0163052
FBXW7_mut	CESC	B cells	-0.100005	0.0657843
FBXW7_mut	HNSC	B cells	-0.149747	0.00409624
FBXW7_mut	CESC	Eosinophils	-0.0178247	0.540961
FBXW7_mut	HNSC	Eosinophils	-0.096972	0.00381455
FBXW7_mut	CESC	Gamma delta T cell	-0.0349444	0.386093
FBXW7_mut	HNSC	Gamma delta T cell	0.00257299	0.953594
FBXW7_mut	CESC	iDC	-0.0443076	0.336753
FBXW7_mut	HNSC	iDC	-0.0648307	0.197738
FBXW7_mut	CESC	Macrophages	-0.0877624	0.114188
FBXW7_mut	HNSC	Macrophages	-0.0428185	0.494053
FBXW7_mut	CESC	Mast cells	-0.0311284	0.551132
FBXW7_mut	HNSC	Mast cells	-0.0717049	0.272065
FBXW7_mut	CESC	Neutrophils	-0.137218	0.0108791
FBXW7_mut	HNSC	Neutrophils	-0.105313	0.083745
FBXW7_mut	CESC	NK CD56bright cells	0.131777	0.0143735
FBXW7_mut	HNSC	NK CD56bright cells	0.0114107	0.800206
FBXW7_mut	CESC	NK CD56dim cells	0.033947	0.590366
FBXW7_mut	HNSC	NK CD56dim cells	0.0206283	0.759516
FBXW7_mut	CESC	Regulatory T cell	-0.112162	0.127746
FBXW7_mut	HNSC	Regulatory T cell	-0.150299	0.040772
FBXW7_mut	CESC	T helper cells	0.0578559	0.195834
FBXW7_mut	HNSC	T helper cells	-0.0597699	0.155346
FBXW7_mut	CESC	Tcm cells	0.0688979	0.0958189
FBXW7_mut	HNSC	Tcm cells	-0.100476	0.0161292
FBXW7_mut	CESC	Tem cells	-0.0971348	0.0367534
FBXW7_mut	HNSC	Tem cells	-0.0902447	0.101562
FBXW7_mut	CESC	Tfh cells	-0.0219194	0.58379
FBXW7_mut	HNSC	Tfh cells	-0.122965	0.00370581
FGFR3_mut	BLCA	Activated CD8 T cell	-0.157701	0.00171167
FGFR3_mut	BLCA	aDC	-0.23646	0.000624245
FGFR3_mut	BLCA	B cells	-0.291383	2.62712e-13
FGFR3_mut	BLCA	Eosinophils	0.00757101	0.753627
FGFR3_mut	BLCA	Gamma delta T cell	-0.0416225	0.197243
FGFR3_mut	BLCA	iDC	-0.120304	0.000383368
FGFR3_mut	BLCA	Macrophages	-0.33719	1.53708e-10
FGFR3_mut	BLCA	Mast cells	-0.155456	0.000541849
FGFR3_mut	BLCA	Neutrophils	-0.229665	9.00471e-07
FGFR3_mut	BLCA	NK CD56bright cells	0.261612	9.48286e-09
FGFR3_mut	BLCA	NK CD56dim cells	-0.249388	7.24959e-07
FGFR3_mut	BLCA	Regulatory T cell	-0.390127	5.62515e-09
FGFR3_mut	BLCA	T helper cells	0.0344157	0.317207
FGFR3_mut	BLCA	Tcm cells	0.0829968	0.013303
FGFR3_mut	BLCA	Tem cells	-0.11146	0.00326431
FGFR3_mut	BLCA	Tfh cells	-0.074111	0.00456026
FN1_mut	BLCA	Activated CD8 T cell	0.164277	0.0771488
FN1_mut	BLCA	aDC	0.174229	0.173515
FN1_mut	BLCA	B cells	0.0453845	0.549338
FN1_mut	BLCA	Eosinophils	-0.0252025	0.570241
FN1_mut	BLCA	Gamma delta T cell	0.0904901	0.127598
FN1_mut	BLCA	iDC	0.0883685	0.159182
FN1_mut	BLCA	Macrophages	0.149859	0.131286
FN1_mut	BLCA	Mast cells	-0.0681364	0.413404
FN1_mut	BLCA	Neutrophils	0.097402	0.264502
FN1_mut	BLCA	NK CD56bright cells	0.0392922	0.646295
FN1_mut	BLCA	NK CD56dim cells	0.101581	0.279894
FN1_mut	BLCA	Regulatory T cell	0.227742	0.06978
FN1_mut	BLCA	T helper cells	0.0828971	0.190373
FN1_mut	BLCA	Tcm cells	0.0466013	0.451729
FN1_mut	BLCA	Tem cells	0.0420445	0.548676
FN1_mut	BLCA	Tfh cells	0.0377642	0.434433
FUBP1_mut	LGG	Activated CD8 T cell	-0.0512273	0.318564
FUBP1_mut	LGG	aDC	0.0162855	0.781642
FUBP1_mut	LGG	B cells	0.0369085	0.223976
FUBP1_mut	LGG	Eosinophils	0.0461514	0.0407473
FUBP1_mut	LGG	Gamma delta T cell	-0.127475	0.00112468
FUBP1_mut	LGG	iDC	-0.0698454	0.0480903
FUBP1_mut	LGG	Macrophages	-0.158818	0.000522114
FUBP1_mut	LGG	Mast cells	0.0989923	0.0030017
FUBP1_mut	LGG	Neutrophils	-0.045336	0.329874
FUBP1_mut	LGG	NK CD56bright cells	0.312443	7.96995e-10
FUBP1_mut	LGG	NK CD56dim cells	0.0608439	0.248848
FUBP1_mut	LGG	Regulatory T cell	-0.103143	0.0358101
FUBP1_mut	LGG	T helper cells	0.0123438	0.738922
FUBP1_mut	LGG	Tcm cells	0.0225158	0.562773
FUBP1_mut	LGG	Tem cells	0.131339	0.000171169
FUBP1_mut	LGG	Tfh cells	0.0605451	0.00686069
GNAS_mut	PAAD	Activated CD8 T cell	-0.0475645	0.716971
GNAS_mut	PAAD	aDC	-0.208971	0.296412
GNAS_mut	PAAD	B cells	-0.0899785	0.488753
GNAS_mut	PAAD	Eosinophils	-0.0328374	0.697031
GNAS_mut	PAAD	Gamma delta T cell	-0.03789	0.713823
GNAS_mut	PAAD	iDC	-0.165442	0.129087
GNAS_mut	PAAD	Macrophages	-0.0438382	0.772797
GNAS_mut	PAAD	Mast cells	0.021478	0.872792
GNAS_mut	PAAD	Neutrophils	0.0600773	0.655336
GNAS_mut	PAAD	NK CD56bright cells	-0.156648	0.220312
GNAS_mut	PAAD	NK CD56dim cells	0.109106	0.488798
GNAS_mut	PAAD	Regulatory T cell	-0.104364	0.567417
GNAS_mut	PAAD	T helper cells	-0.0511422	0.628806
GNAS_mut	PAAD	Tcm cells	-0.0793541	0.486424
GNAS_mut	PAAD	Tem cells	0.102691	0.402153
GNAS_mut	PAAD	Tfh cells	0.0445299	0.626978
HLA-ABC_mut	CESC	Activated CD8 T cell	0.152208	0.0613779
HLA-ABC_mut	ESCA	Activated CD8 T cell	0.138536	0.27694
HLA-ABC_mut	HNSC	Activated CD8 T cell	0.27145	7.458e-06
HLA-ABC_mut	PAN-CANCER	Activated CD8 T cell	0.128038	2.49206e-07
HLA-ABC_mut	CESC	aDC	0.23937	0.0237689
HLA-ABC_mut	ESCA	aDC	-0.17271	0.31303
HLA-ABC_mut	HNSC	aDC	0.22202	0.00693255
HLA-ABC_mut	PAN-CANCER	aDC	0.119448	0.0001741
HLA-ABC_mut	CESC	B cells	0.166082	0.00857646
HLA-ABC_mut	ESCA	B cells	-0.0975735	0.337438
HLA-ABC_mut	HNSC	B cells	0.0634509	0.183089
HLA-ABC_mut	PAN-CANCER	B cells	0.0169921	0.386071
HLA-ABC_mut	CESC	Eosinophils	0.0202704	0.551052
HLA-ABC_mut	ESCA	Eosinophils	-0.0349477	0.683872
HLA-ABC_mut	HNSC	Eosinophils	-0.0375478	0.220263
HLA-ABC_mut	PAN-CANCER	Eosinophils	-0.00962045	0.458422
HLA-ABC_mut	CESC	Gamma delta T cell	0.153707	0.000970616
HLA-ABC_mut	ESCA	Gamma delta T cell	0.0508915	0.555139
HLA-ABC_mut	HNSC	Gamma delta T cell	0.115197	0.00406486
HLA-ABC_mut	PAN-CANCER	Gamma delta T cell	0.0452417	0.00540239
HLA-ABC_mut	CESC	iDC	0.116912	0.0291824
HLA-ABC_mut	ESCA	iDC	-0.0618238	0.508835
HLA-ABC_mut	HNSC	iDC	0.0262814	0.566656
HLA-ABC_mut	PAN-CANCER	iDC	0.00974256	0.587437
HLA-ABC_mut	CESC	Macrophages	0.0950977	0.142277
HLA-ABC_mut	ESCA	Macrophages	-0.103891	0.393345
HLA-ABC_mut	HNSC	Macrophages	0.0512368	0.368775
HLA-ABC_mut	PAN-CANCER	Macrophages	0.0442149	0.0555789
HLA-ABC_mut	CESC	Mast cells	0.100985	0.0965563
HLA-ABC_mut	ESCA	Mast cells	-0.150262	0.280643
HLA-ABC_mut	HNSC	Mast cells	-0.0224492	0.705883
HLA-ABC_mut	PAN-CANCER	Mast cells	-0.0406276	0.0487548
HLA-ABC_mut	CESC	Neutrophils	0.126472	0.0446083
HLA-ABC_mut	ESCA	Neutrophils	0.219135	0.0734326
HLA-ABC_mut	HNSC	Neutrophils	0.0414373	0.4555
HLA-ABC_mut	PAN-CANCER	Neutrophils	0.0228448	0.29708
HLA-ABC_mut	CESC	NK CD56bright cells	0.0327089	0.604209
HLA-ABC_mut	ESCA	NK CD56bright cells	0.095869	0.374598
HLA-ABC_mut	HNSC	NK CD56bright cells	0.0543319	0.185371
HLA-ABC_mut	PAN-CANCER	NK CD56bright cells	-0.00493218	0.80559
HLA-ABC_mut	CESC	NK CD56dim cells	0.129782	0.0768488
HLA-ABC_mut	ESCA	NK CD56dim cells	0.117673	0.358759
HLA-ABC_mut	HNSC	NK CD56dim cells	0.22757	0.000188024
HLA-ABC_mut	PAN-CANCER	NK CD56dim cells	0.0887075	0.000419389
HLA-ABC_mut	CESC	Regulatory T cell	0.178007	0.03785
HLA-ABC_mut	ESCA	Regulatory T cell	-0.0526273	0.744686
HLA-ABC_mut	HNSC	Regulatory T cell	0.159014	0.017378
HLA-ABC_mut	PAN-CANCER	Regulatory T cell	0.0714896	0.00954619
HLA-ABC_mut	CESC	T helper cells	-0.0142311	0.785274
HLA-ABC_mut	ESCA	T helper cells	0.117483	0.155202
HLA-ABC_mut	HNSC	T helper cells	0.0324	0.397975
HLA-ABC_mut	PAN-CANCER	T helper cells	0.0700481	5.07201e-05
HLA-ABC_mut	CESC	Tcm cells	-0.00203643	0.966412
HLA-ABC_mut	ESCA	Tcm cells	0.0356123	0.668914
HLA-ABC_mut	HNSC	Tcm cells	0.00590707	0.876923
HLA-ABC_mut	PAN-CANCER	Tcm cells	0.00834881	0.640569
HLA-ABC_mut	CESC	Tem cells	0.0916868	0.0913699
HLA-ABC_mut	ESCA	Tem cells	-0.10934	0.349615
HLA-ABC_mut	HNSC	Tem cells	0.058363	0.245238
HLA-ABC_mut	PAN-CANCER	Tem cells	0.00940237	0.627414
HLA-ABC_mut	CESC	Tfh cells	0.0719166	0.12252
HLA-ABC_mut	ESCA	Tfh cells	0.00976883	0.898948
HLA-ABC_mut	HNSC	Tfh cells	0.0256318	0.508223
HLA-ABC_mut	PAN-CANCER	Tfh cells	-0.00538473	0.704112
HRAS_mut	HNSC	Activated CD8 T cell	0.252798	0.000303509
HRAS_mut	PCPG	Activated CD8 T cell	0.236284	0.00732717
HRAS_mut	THCA	Activated CD8 T cell	-0.282921	0.00279201
HRAS_mut	HNSC	aDC	0.276903	0.00341354
HRAS_mut	PCPG	aDC	0.4477	1.3347e-05
HRAS_mut	THCA	aDC	-0.532256	5.03461e-06
HRAS_mut	HNSC	B cells	0.0025506	0.962947
HRAS_mut	PCPG	B cells	0.0206875	0.744162
HRAS_mut	THCA	B cells	0.0927005	0.166156
HRAS_mut	HNSC	Eosinophils	-0.0671967	0.0563703
HRAS_mut	PCPG	Eosinophils	0.0560134	0.187027
HRAS_mut	THCA	Eosinophils	-0.0459865	0.30435
HRAS_mut	HNSC	Gamma delta T cell	0.161953	0.000436695
HRAS_mut	PCPG	Gamma delta T cell	0.0551269	0.358271
HRAS_mut	THCA	Gamma delta T cell	-0.35687	3.54222e-08
HRAS_mut	HNSC	iDC	-0.0549352	0.297865
HRAS_mut	PCPG	iDC	0.0454946	0.473863
HRAS_mut	THCA	iDC	-0.222371	0.000294391
HRAS_mut	HNSC	Macrophages	0.117784	0.0722759
HRAS_mut	PCPG	Macrophages	-0.0172197	0.832253
HRAS_mut	THCA	Macrophages	-0.438761	2.12547e-06
HRAS_mut	HNSC	Mast cells	-0.120451	0.0780683
HRAS_mut	PCPG	Mast cells	0.104818	0.0845363
HRAS_mut	THCA	Mast cells	-0.0673074	0.339751
HRAS_mut	HNSC	Neutrophils	0.129139	0.0429283
HRAS_mut	PCPG	Neutrophils	0.15718	0.0550639
HRAS_mut	THCA	Neutrophils	-0.286321	0.000425989
HRAS_mut	HNSC	NK CD56bright cells	0.0532412	0.2596
HRAS_mut	PCPG	NK CD56bright cells	0.102253	0.161916
HRAS_mut	THCA	NK CD56bright cells	-0.0617119	0.410168
HRAS_mut	HNSC	NK CD56dim cells	0.162571	0.0210041
HRAS_mut	PCPG	NK CD56dim cells	0.145451	0.125418
HRAS_mut	THCA	NK CD56dim cells	-0.177393	0.0511148
HRAS_mut	HNSC	Regulatory T cell	0.199805	0.00936914
HRAS_mut	PCPG	Regulatory T cell	0.0236559	0.799402
HRAS_mut	THCA	Regulatory T cell	-0.398898	0.000108103
HRAS_mut	HNSC	T helper cells	-0.00773957	0.86079
HRAS_mut	PCPG	T helper cells	-0.0664295	0.164567
HRAS_mut	THCA	T helper cells	-0.139014	0.0208425
HRAS_mut	HNSC	Tcm cells	-0.0138267	0.752777
HRAS_mut	PCPG	Tcm cells	0.132345	0.0174953
HRAS_mut	THCA	Tcm cells	-0.130227	0.0439613
HRAS_mut	HNSC	Tem cells	0.000592127	0.991833
HRAS_mut	PCPG	Tem cells	-0.0874259	0.191189
HRAS_mut	THCA	Tem cells	-0.101646	0.111404
HRAS_mut	HNSC	Tfh cells	-0.0152845	0.731801
HRAS_mut	PCPG	Tfh cells	0.0491522	0.291064
HRAS_mut	THCA	Tfh cells	0.145966	0.00724163
IDH1_mut	CHOL	Activated CD8 T cell	0.201151	0.189094
IDH1_mut	GBM	Activated CD8 T cell	-0.180998	0.177279
IDH1_mut	LGG	Activated CD8 T cell	-0.19777	6.273e-09
IDH1_mut	PAN-CANCER	Activated CD8 T cell	-0.0272846	0.103897
IDH1_mut	CHOL	aDC	-0.483828	0.0286971
IDH1_mut	GBM	aDC	-0.276935	0.0778952
IDH1_mut	LGG	aDC	-0.141023	0.000336064
IDH1_mut	PAN-CANCER	aDC	-0.00698113	0.745424
IDH1_mut	CHOL	B cells	-0.154882	0.217974
IDH1_mut	GBM	B cells	0.0345727	0.682713
IDH1_mut	LGG	B cells	-0.0333776	0.102362
IDH1_mut	PAN-CANCER	B cells	-0.0129135	0.329454
IDH1_mut	CHOL	Eosinophils	-0.0591652	0.45326
IDH1_mut	GBM	Eosinophils	-0.164809	0.00785447
IDH1_mut	LGG	Eosinophils	-0.0678464	6.76617e-06
IDH1_mut	PAN-CANCER	Eosinophils	-0.0310144	0.000400244
IDH1_mut	CHOL	Gamma delta T cell	0.169589	0.114489
IDH1_mut	GBM	Gamma delta T cell	-0.204271	0.0378217
IDH1_mut	LGG	Gamma delta T cell	-0.147605	1.52744e-08
IDH1_mut	PAN-CANCER	Gamma delta T cell	-0.0184955	0.0922708
IDH1_mut	CHOL	iDC	0.0847642	0.507967
IDH1_mut	GBM	iDC	-0.210513	0.0237478
IDH1_mut	LGG	iDC	-0.147637	2.7383e-10
IDH1_mut	PAN-CANCER	iDC	-0.0336364	0.00554142
IDH1_mut	CHOL	Macrophages	-0.0172873	0.910782
IDH1_mut	GBM	Macrophages	-0.316165	0.0125018
IDH1_mut	LGG	Macrophages	-0.166639	5.01268e-08
IDH1_mut	PAN-CANCER	Macrophages	-0.0322298	0.0388378
IDH1_mut	CHOL	Mast cells	-0.182995	0.108901
IDH1_mut	GBM	Mast cells	-0.0401869	0.610407
IDH1_mut	LGG	Mast cells	-0.0581908	0.00968182
IDH1_mut	PAN-CANCER	Mast cells	-0.0153267	0.271084
IDH1_mut	CHOL	Neutrophils	-0.1856	0.188639
IDH1_mut	GBM	Neutrophils	-0.260633	0.0360143
IDH1_mut	LGG	Neutrophils	-0.192936	3.53895e-10
IDH1_mut	PAN-CANCER	Neutrophils	-0.0539536	0.000265225
IDH1_mut	CHOL	NK CD56bright cells	0.0765548	0.519303
IDH1_mut	GBM	NK CD56bright cells	-0.173556	0.0828308
IDH1_mut	LGG	NK CD56bright cells	-0.0181042	0.603768
IDH1_mut	PAN-CANCER	NK CD56bright cells	-0.000567936	0.966533
IDH1_mut	CHOL	NK CD56dim cells	0.0368881	0.827825
IDH1_mut	GBM	NK CD56dim cells	-0.0769107	0.520531
IDH1_mut	LGG	NK CD56dim cells	-0.144727	4.07276e-05
IDH1_mut	PAN-CANCER	NK CD56dim cells	0.0196172	0.248275
IDH1_mut	CHOL	Regulatory T cell	-0.0459026	0.811188
IDH1_mut	GBM	Regulatory T cell	-0.324493	0.0199243
IDH1_mut	LGG	Regulatory T cell	-0.164257	5.34581e-07
IDH1_mut	PAN-CANCER	Regulatory T cell	-0.0329808	0.0767215
IDH1_mut	CHOL	T helper cells	-0.31837	0.0122929
IDH1_mut	GBM	T helper cells	0.258002	0.000730759
IDH1_mut	LGG	T helper cells	0.11527	3.01187e-06
IDH1_mut	PAN-CANCER	T helper cells	0.0558142	1.74362e-06
IDH1_mut	CHOL	Tcm cells	-0.231479	0.0458919
IDH1_mut	GBM	Tcm cells	0.286776	0.00330021
IDH1_mut	LGG	Tcm cells	0.122634	2.23939e-06
IDH1_mut	PAN-CANCER	Tcm cells	0.0276379	0.0221036
IDH1_mut	CHOL	Tem cells	-0.0702237	0.579255
IDH1_mut	GBM	Tem cells	0.206327	0.0750874
IDH1_mut	LGG	Tem cells	0.141021	1.38563e-09
IDH1_mut	PAN-CANCER	Tem cells	0.021496	0.100396
IDH1_mut	CHOL	Tfh cells	-0.144441	0.093703
IDH1_mut	GBM	Tfh cells	0.0811056	0.222458
IDH1_mut	LGG	Tfh cells	0.060027	6.43673e-05
IDH1_mut	PAN-CANCER	Tfh cells	0.00950675	0.320873
KDM6A_mut	BLCA	Activated CD8 T cell	-0.0975056	0.0132186
KDM6A_mut	ESCA	Activated CD8 T cell	0.15497	0.292251
KDM6A_mut	KIRP	Activated CD8 T cell	0.0500382	0.670873
KDM6A_mut	PAAD	Activated CD8 T cell	-0.0481879	0.703242
KDM6A_mut	PAN-CANCER	Activated CD8 T cell	-0.0151866	0.518507
KDM6A_mut	SKCM	Activated CD8 T cell	0.0888691	0.406091
KDM6A_mut	BLCA	aDC	-0.106808	0.0489062
KDM6A_mut	ESCA	aDC	0.231896	0.240478
KDM6A_mut	KIRP	aDC	-0.0854421	0.569691
KDM6A_mut	PAAD	aDC	-0.0435214	0.82185
KDM6A_mut	PAN-CANCER	aDC	-0.0460955	0.126177
KDM6A_mut	SKCM	aDC	0.209693	0.150704
KDM6A_mut	BLCA	B cells	-0.126966	6.68182e-05
KDM6A_mut	ESCA	B cells	0.117948	0.315202
KDM6A_mut	KIRP	B cells	-0.0167902	0.823395
KDM6A_mut	PAAD	B cells	-0.136507	0.275403
KDM6A_mut	PAN-CANCER	B cells	-0.0453406	0.0145715
KDM6A_mut	SKCM	B cells	0.253498	0.00727118
KDM6A_mut	BLCA	Eosinophils	-0.00364063	0.846729
KDM6A_mut	ESCA	Eosinophils	0.0403917	0.683578
KDM6A_mut	KIRP	Eosinophils	-0.0446424	0.452288
KDM6A_mut	PAAD	Eosinophils	-0.083475	0.303889
KDM6A_mut	PAN-CANCER	Eosinophils	0.0102225	0.405394
KDM6A_mut	SKCM	Eosinophils	0.107937	0.0284815
KDM6A_mut	BLCA	Gamma delta T cell	-0.0339323	0.178143
KDM6A_mut	ESCA	Gamma delta T cell	0.0762286	0.443833
KDM6A_mut	KIRP	Gamma delta T cell	0.00610997	0.941542
KDM6A_mut	PAAD	Gamma delta T cell	-0.107477	0.27976
KDM6A_mut	PAN-CANCER	Gamma delta T cell	0.00578408	0.707262
KDM6A_mut	SKCM	Gamma delta T cell	0.0100067	0.860129
KDM6A_mut	BLCA	iDC	-0.0445039	0.0944616
KDM6A_mut	ESCA	iDC	-0.012917	0.9049
KDM6A_mut	KIRP	iDC	0.0226611	0.807077
KDM6A_mut	PAAD	iDC	-0.0765777	0.467539
KDM6A_mut	PAN-CANCER	iDC	-0.0136709	0.421389
KDM6A_mut	SKCM	iDC	0.0764878	0.334042
KDM6A_mut	BLCA	Macrophages	-0.129809	0.00196378
KDM6A_mut	ESCA	Macrophages	0.148915	0.289049
KDM6A_mut	KIRP	Macrophages	0.0377902	0.747183
KDM6A_mut	PAAD	Macrophages	-0.32273	0.026235
KDM6A_mut	PAN-CANCER	Macrophages	-0.0332392	0.128573
KDM6A_mut	SKCM	Macrophages	0.115977	0.194302
KDM6A_mut	BLCA	Mast cells	-0.0823592	0.0194017
KDM6A_mut	ESCA	Mast cells	0.0392153	0.807638
KDM6A_mut	KIRP	Mast cells	0.0815324	0.454312
KDM6A_mut	PAAD	Mast cells	-0.23015	0.0735953
KDM6A_mut	PAN-CANCER	Mast cells	-0.0271464	0.164362
KDM6A_mut	SKCM	Mast cells	0.051338	0.524918
KDM6A_mut	BLCA	Neutrophils	-0.129588	0.000424678
KDM6A_mut	ESCA	Neutrophils	0.17791	0.209176
KDM6A_mut	KIRP	Neutrophils	-0.0773676	0.420178
KDM6A_mut	PAAD	Neutrophils	-0.341147	0.00782477
KDM6A_mut	PAN-CANCER	Neutrophils	-0.0456842	0.027642
KDM6A_mut	SKCM	Neutrophils	0.0541773	0.557506
KDM6A_mut	BLCA	NK CD56bright cells	0.0708414	0.0505856
KDM6A_mut	ESCA	NK CD56bright cells	-0.132054	0.289273
KDM6A_mut	KIRP	NK CD56bright cells	-0.0772018	0.349412
KDM6A_mut	PAAD	NK CD56bright cells	0.0349009	0.777501
KDM6A_mut	PAN-CANCER	NK CD56bright cells	0.0148993	0.432347
KDM6A_mut	SKCM	NK CD56bright cells	0.0985888	0.259749
KDM6A_mut	BLCA	NK CD56dim cells	-0.100401	0.0115357
KDM6A_mut	ESCA	NK CD56dim cells	0.236278	0.109645
KDM6A_mut	KIRP	NK CD56dim cells	-0.0755953	0.48609
KDM6A_mut	PAAD	NK CD56dim cells	-0.289754	0.0552286
KDM6A_mut	PAN-CANCER	NK CD56dim cells	-0.0193546	0.416481
KDM6A_mut	SKCM	NK CD56dim cells	0.0136934	0.909061
KDM6A_mut	BLCA	Regulatory T cell	-0.148967	0.00504384
KDM6A_mut	ESCA	Regulatory T cell	0.276368	0.137414
KDM6A_mut	KIRP	Regulatory T cell	-0.0847933	0.527922
KDM6A_mut	PAAD	Regulatory T cell	-0.495885	0.00429544
KDM6A_mut	PAN-CANCER	Regulatory T cell	-0.0471068	0.0713206
KDM6A_mut	SKCM	Regulatory T cell	0.19731	0.0930146
KDM6A_mut	BLCA	T helper cells	-0.0145696	0.587758
KDM6A_mut	ESCA	T helper cells	0.0990946	0.299749
KDM6A_mut	KIRP	T helper cells	-0.113343	0.134531
KDM6A_mut	PAAD	T helper cells	-0.126044	0.21554
KDM6A_mut	PAN-CANCER	T helper cells	-0.00294611	0.857228
KDM6A_mut	SKCM	T helper cells	0.0841709	0.305942
KDM6A_mut	BLCA	Tcm cells	-0.0176215	0.502354
KDM6A_mut	ESCA	Tcm cells	-0.041288	0.667638
KDM6A_mut	KIRP	Tcm cells	-0.0367349	0.670496
KDM6A_mut	PAAD	Tcm cells	-0.192736	0.0782118
KDM6A_mut	PAN-CANCER	Tcm cells	-0.0245348	0.147308
KDM6A_mut	SKCM	Tcm cells	0.185994	0.0216078
KDM6A_mut	BLCA	Tem cells	-0.0796764	0.00712535
KDM6A_mut	ESCA	Tem cells	0.0836426	0.535749
KDM6A_mut	KIRP	Tem cells	-0.105079	0.256374
KDM6A_mut	PAAD	Tem cells	-0.220671	0.0606271
KDM6A_mut	PAN-CANCER	Tem cells	-0.0406632	0.0266156
KDM6A_mut	SKCM	Tem cells	-0.00456485	0.950472
KDM6A_mut	BLCA	Tfh cells	-0.0279434	0.172397
KDM6A_mut	ESCA	Tfh cells	0.0368136	0.678466
KDM6A_mut	KIRP	Tfh cells	-0.136048	0.00770421
KDM6A_mut	PAAD	Tfh cells	-0.123621	0.16047
KDM6A_mut	PAN-CANCER	Tfh cells	-0.0177468	0.186206
KDM6A_mut	SKCM	Tfh cells	0.180315	0.00865089
KRAS_mut	CESC	Activated CD8 T cell	-0.147611	0.129154
KRAS_mut	CHOL	Activated CD8 T cell	-0.0506393	0.830574
KRAS_mut	COREAD	Activated CD8 T cell	-0.0764706	0.0100233
KRAS_mut	PAAD	Activated CD8 T cell	-0.160887	0.00734657
KRAS_mut	PAN-CANCER	Activated CD8 T cell	-0.0197655	0.181905
KRAS_mut	UCS	Activated CD8 T cell	0.00357488	0.977225
KRAS_mut	CESC	aDC	-0.475801	0.000148274
KRAS_mut	CHOL	aDC	-0.315529	0.364119
KRAS_mut	COREAD	aDC	-0.025713	0.56964
KRAS_mut	PAAD	aDC	-0.013209	0.886813
KRAS_mut	PAN-CANCER	aDC	-0.045243	0.0170928
KRAS_mut	UCS	aDC	-0.00884807	0.959351
KRAS_mut	CESC	B cells	-0.184389	0.0146324
KRAS_mut	CHOL	B cells	0.201562	0.294797
KRAS_mut	COREAD	B cells	-0.019419	0.501976
KRAS_mut	PAAD	B cells	-0.203008	0.00058333
KRAS_mut	PAN-CANCER	B cells	-0.0615148	1.37856e-07
KRAS_mut	UCS	B cells	0.101176	0.306967
KRAS_mut	CESC	Eosinophils	0.0298224	0.462625
KRAS_mut	CHOL	Eosinophils	0.204665	0.0831282
KRAS_mut	COREAD	Eosinophils	0.0154143	0.434267
KRAS_mut	PAAD	Eosinophils	0.00950391	0.807688
KRAS_mut	PAN-CANCER	Eosinophils	0.0245135	0.00152315
KRAS_mut	UCS	Eosinophils	0.0198664	0.785276
KRAS_mut	CESC	Gamma delta T cell	-0.0300207	0.593061
KRAS_mut	CHOL	Gamma delta T cell	0.20256	0.219968
KRAS_mut	COREAD	Gamma delta T cell	-0.0495258	0.0180818
KRAS_mut	PAAD	Gamma delta T cell	-0.0775297	0.103506
KRAS_mut	PAN-CANCER	Gamma delta T cell	-0.016154	0.0956773
KRAS_mut	UCS	Gamma delta T cell	0.0573132	0.561029
KRAS_mut	CESC	iDC	-0.0253267	0.693597
KRAS_mut	CHOL	iDC	0.324998	0.0900233
KRAS_mut	COREAD	iDC	-0.051083	0.0567156
KRAS_mut	PAAD	iDC	-0.0560294	0.267654
KRAS_mut	PAN-CANCER	iDC	-0.0234895	0.0281827
KRAS_mut	UCS	iDC	-0.0143118	0.899594
KRAS_mut	CESC	Macrophages	-0.166711	0.0308769
KRAS_mut	CHOL	Macrophages	0.509612	0.0244279
KRAS_mut	COREAD	Macrophages	-0.0590478	0.0857295
KRAS_mut	PAAD	Macrophages	-0.0804753	0.251189
KRAS_mut	PAN-CANCER	Macrophages	-0.0381135	0.00562987
KRAS_mut	UCS	Macrophages	-0.084141	0.501158
KRAS_mut	CESC	Mast cells	-0.0665874	0.359724
KRAS_mut	CHOL	Mast cells	0.388135	0.0230048
KRAS_mut	COREAD	Mast cells	-0.0635526	0.0473227
KRAS_mut	PAAD	Mast cells	-0.163606	0.00766404
KRAS_mut	PAN-CANCER	Mast cells	-0.0186479	0.129165
KRAS_mut	UCS	Mast cells	0.0351877	0.744934
KRAS_mut	CESC	Neutrophils	-0.0820083	0.27677
KRAS_mut	CHOL	Neutrophils	0.27398	0.203682
KRAS_mut	COREAD	Neutrophils	-0.113888	0.000813936
KRAS_mut	PAAD	Neutrophils	-0.0912036	0.141878
KRAS_mut	PAN-CANCER	Neutrophils	-0.0267893	0.0402232
KRAS_mut	UCS	Neutrophils	-0.0960764	0.40504
KRAS_mut	CESC	NK CD56bright cells	0.282617	0.000146076
KRAS_mut	CHOL	NK CD56bright cells	0.149007	0.409961
KRAS_mut	COREAD	NK CD56bright cells	-0.0125665	0.673705
KRAS_mut	PAAD	NK CD56bright cells	0.244983	2.06514e-05
KRAS_mut	PAN-CANCER	NK CD56bright cells	0.0446061	0.000187294
KRAS_mut	UCS	NK CD56bright cells	0.0711175	0.552456
KRAS_mut	CESC	NK CD56dim cells	-0.173713	0.0472242
KRAS_mut	CHOL	NK CD56dim cells	-0.269599	0.293456
KRAS_mut	COREAD	NK CD56dim cells	-0.122632	0.00029591
KRAS_mut	PAAD	NK CD56dim cells	-0.215482	0.00273527
KRAS_mut	PAN-CANCER	NK CD56dim cells	-0.0466723	0.00184991
KRAS_mut	UCS	NK CD56dim cells	-0.0145963	0.922029
KRAS_mut	CESC	Regulatory T cell	-0.322249	0.001559
KRAS_mut	CHOL	Regulatory T cell	0.460907	0.108912
KRAS_mut	COREAD	Regulatory T cell	-0.114153	0.00317021
KRAS_mut	PAAD	Regulatory T cell	-0.173828	0.0383029
KRAS_mut	PAN-CANCER	Regulatory T cell	-0.0643376	9.07761e-05
KRAS_mut	UCS	Regulatory T cell	-0.176569	0.263061
KRAS_mut	CESC	T helper cells	-0.0336679	0.589338
KRAS_mut	CHOL	T helper cells	-0.0402776	0.842995
KRAS_mut	COREAD	T helper cells	0.0397462	0.142067
KRAS_mut	PAAD	T helper cells	-0.000679986	0.988925
KRAS_mut	PAN-CANCER	T helper cells	0.000278919	0.978415
KRAS_mut	UCS	T helper cells	0.135017	0.118932
KRAS_mut	CESC	Tcm cells	-0.123115	0.0323318
KRAS_mut	CHOL	Tcm cells	-0.196952	0.27566
KRAS_mut	COREAD	Tcm cells	0.0554012	0.0326005
KRAS_mut	PAAD	Tcm cells	-0.00193205	0.970819
KRAS_mut	PAN-CANCER	Tcm cells	0.00596582	0.575682
KRAS_mut	UCS	Tcm cells	0.0215571	0.823593
KRAS_mut	CESC	Tem cells	0.0423385	0.514841
KRAS_mut	CHOL	Tem cells	0.0737192	0.703117
KRAS_mut	COREAD	Tem cells	-0.0450228	0.103552
KRAS_mut	PAAD	Tem cells	-0.207958	0.000178179
KRAS_mut	PAN-CANCER	Tem cells	-0.0220831	0.055801
KRAS_mut	UCS	Tem cells	-0.139356	0.236138
KRAS_mut	CESC	Tfh cells	-0.0178412	0.748878
KRAS_mut	CHOL	Tfh cells	0.131817	0.322713
KRAS_mut	COREAD	Tfh cells	-0.00496972	0.824207
KRAS_mut	PAAD	Tfh cells	-0.151565	0.000259299
KRAS_mut	PAN-CANCER	Tfh cells	-0.0113181	0.180512
KRAS_mut	UCS	Tfh cells	0.104787	0.202441
MAP2K4_mut	BRCA	Activated CD8 T cell	-0.157054	0.00572961
MAP2K4_mut	BRCA	aDC	-0.0710772	0.300678
MAP2K4_mut	BRCA	B cells	-0.111169	0.0228806
MAP2K4_mut	BRCA	Eosinophils	-0.0270951	0.385578
MAP2K4_mut	BRCA	Gamma delta T cell	-0.0859987	0.0258484
MAP2K4_mut	BRCA	iDC	-0.0166828	0.669258
MAP2K4_mut	BRCA	Macrophages	-0.0760735	0.15542
MAP2K4_mut	BRCA	Mast cells	-0.0107046	0.824735
MAP2K4_mut	BRCA	Neutrophils	-0.040734	0.399915
MAP2K4_mut	BRCA	NK CD56bright cells	0.0400916	0.362239
MAP2K4_mut	BRCA	NK CD56dim cells	-0.110477	0.0556432
MAP2K4_mut	BRCA	Regulatory T cell	-0.0560492	0.353054
MAP2K4_mut	BRCA	T helper cells	-0.0372042	0.353144
MAP2K4_mut	BRCA	Tcm cells	-0.0350418	0.401144
MAP2K4_mut	BRCA	Tem cells	-0.0905722	0.0297454
MAP2K4_mut	BRCA	Tfh cells	-0.0482155	0.0813942
MAP3K1_mut	BRCA	Activated CD8 T cell	-0.172104	2.63825e-05
MAP3K1_mut	BRCA	aDC	-0.177596	0.000328697
MAP3K1_mut	BRCA	B cells	-0.0257834	0.46574
MAP3K1_mut	BRCA	Eosinophils	0.00243681	0.914012
MAP3K1_mut	BRCA	Gamma delta T cell	-0.063506	0.0227397
MAP3K1_mut	BRCA	iDC	0.0514132	0.0681989
MAP3K1_mut	BRCA	Macrophages	-0.0437201	0.258572
MAP3K1_mut	BRCA	Mast cells	0.128547	0.000219575
MAP3K1_mut	BRCA	Neutrophils	-0.0338269	0.333261
MAP3K1_mut	BRCA	NK CD56bright cells	-0.00227674	0.942925
MAP3K1_mut	BRCA	NK CD56dim cells	-0.0487863	0.242434
MAP3K1_mut	BRCA	Regulatory T cell	-0.0230487	0.597172
MAP3K1_mut	BRCA	T helper cells	-0.0394072	0.173328
MAP3K1_mut	BRCA	Tcm cells	0.00591004	0.844654
MAP3K1_mut	BRCA	Tem cells	-0.0273835	0.363637
MAP3K1_mut	BRCA	Tfh cells	-0.00636237	0.750488
MDM2_AMP	SARC	Activated CD8 T cell	0.195579	0.00214254
MDM2_AMP	SARC	aDC	0.218356	0.0027849
MDM2_AMP	SARC	B cells	0.121758	0.00190201
MDM2_AMP	SARC	Eosinophils	0.24513	9.03115e-15
MDM2_AMP	SARC	Gamma delta T cell	0.184984	6.37642e-06
MDM2_AMP	SARC	iDC	0.218205	2.90978e-07
MDM2_AMP	SARC	Macrophages	0.230786	8.97133e-06
MDM2_AMP	SARC	Mast cells	0.165754	9.83455e-06
MDM2_AMP	SARC	Neutrophils	0.248692	3.4084e-06
MDM2_AMP	SARC	NK CD56bright cells	-0.0774663	0.0708805
MDM2_AMP	SARC	NK CD56dim cells	0.184453	0.00277204
MDM2_AMP	SARC	Regulatory T cell	0.239028	0.000141879
MDM2_AMP	SARC	T helper cells	0.0210086	0.564909
MDM2_AMP	SARC	Tcm cells	0.110119	0.0052679
MDM2_AMP	SARC	Tem cells	0.0899687	0.0390711
MDM2_AMP	SARC	Tfh cells	0.290577	5.54014e-14
MED12_mut	CESC	Activated CD8 T cell	-0.189225	0.0949166
MED12_mut	CESC	aDC	-0.278204	0.0593803
MED12_mut	CESC	B cells	-0.0344684	0.696832
MED12_mut	CESC	Eosinophils	0.000879107	0.985183
MED12_mut	CESC	Gamma delta T cell	-0.062903	0.336325
MED12_mut	CESC	iDC	-0.0706298	0.345445
MED12_mut	CESC	Macrophages	-0.126925	0.159436
MED12_mut	CESC	Mast cells	0.0106327	0.900199
MED12_mut	CESC	Neutrophils	-0.100383	0.253221
MED12_mut	CESC	NK CD56bright cells	0.0509062	0.562124
MED12_mut	CESC	NK CD56dim cells	-0.154956	0.129339
MED12_mut	CESC	Regulatory T cell	-0.147472	0.217587
MED12_mut	CESC	T helper cells	0.0514477	0.478961
MED12_mut	CESC	Tcm cells	0.0621358	0.355552
MED12_mut	CESC	Tem cells	0.0157993	0.834839
MED12_mut	CESC	Tfh cells	-0.0477917	0.461636
MET_mut	KIRP	Activated CD8 T cell	-0.154973	0.0640876
MET_mut	KIRP	aDC	-0.16905	0.113905
MET_mut	KIRP	B cells	-0.0222968	0.677587
MET_mut	KIRP	Eosinophils	0.101426	0.0160953
MET_mut	KIRP	Gamma delta T cell	-0.0735652	0.214903
MET_mut	KIRP	iDC	-0.0944178	0.152788
MET_mut	KIRP	Macrophages	-0.0559116	0.503377
MET_mut	KIRP	Mast cells	0.0907068	0.242608
MET_mut	KIRP	Neutrophils	-0.135694	0.0466841
MET_mut	KIRP	NK CD56bright cells	0.130781	0.0256278
MET_mut	KIRP	NK CD56dim cells	-0.245506	0.00136699
MET_mut	KIRP	Regulatory T cell	-0.0359028	0.70783
MET_mut	KIRP	T helper cells	0.102283	0.0578844
MET_mut	KIRP	Tcm cells	0.0248252	0.686732
MET_mut	KIRP	Tem cells	0.0800807	0.224944
MET_mut	KIRP	Tfh cells	0.0683571	0.0612312
MLL3_mut	BRCA	Activated CD8 T cell	-0.0276291	0.520186
MLL3_mut	PAAD	Activated CD8 T cell	-0.0530634	0.666301
MLL3_mut	BRCA	aDC	-0.000670793	0.989671
MLL3_mut	PAAD	aDC	-0.0445149	0.81286
MLL3_mut	BRCA	B cells	-0.0742857	0.0438779
MLL3_mut	PAAD	B cells	0.0548628	0.652821
MLL3_mut	BRCA	Eosinophils	-0.00907661	0.700018
MLL3_mut	PAAD	Eosinophils	0.0560363	0.47846
MLL3_mut	BRCA	Gamma delta T cell	-0.0335881	0.24902
MLL3_mut	PAAD	Gamma delta T cell	-0.106328	0.271667
MLL3_mut	BRCA	iDC	0.0321468	0.274993
MLL3_mut	PAAD	iDC	-0.115906	0.257752
MLL3_mut	BRCA	Macrophages	-0.00699509	0.862578
MLL3_mut	PAAD	Macrophages	-0.166066	0.242552
MLL3_mut	BRCA	Mast cells	-0.0413616	0.256412
MLL3_mut	PAAD	Mast cells	-0.0579178	0.645168
MLL3_mut	BRCA	Neutrophils	-0.0124836	0.732372
MLL3_mut	PAAD	Neutrophils	-0.0461222	0.714871
MLL3_mut	BRCA	NK CD56bright cells	0.0297051	0.37078
MLL3_mut	PAAD	NK CD56bright cells	-0.0443514	0.712014
MLL3_mut	BRCA	NK CD56dim cells	-0.0659737	0.129861
MLL3_mut	PAAD	NK CD56dim cells	-0.0625446	0.672392
MLL3_mut	BRCA	Regulatory T cell	0.00440176	0.922987
MLL3_mut	PAAD	Regulatory T cell	-0.116769	0.49502
MLL3_mut	BRCA	T helper cells	-0.0200712	0.50666
MLL3_mut	PAAD	T helper cells	0.0604755	0.54212
MLL3_mut	BRCA	Tcm cells	-0.0407544	0.195331
MLL3_mut	PAAD	Tcm cells	0.0724014	0.498385
MLL3_mut	BRCA	Tem cells	-0.0164236	0.601772
MLL3_mut	PAAD	Tem cells	-0.0639152	0.578492
MLL3_mut	BRCA	Tfh cells	6.23548e-05	0.997618
MLL3_mut	PAAD	Tfh cells	-0.0801059	0.35076
MTOR_mut	ESCA	Activated CD8 T cell	-0.170526	0.218227
MTOR_mut	ESCA	aDC	0.196726	0.290543
MTOR_mut	ESCA	B cells	-0.00790905	0.943071
MTOR_mut	ESCA	Eosinophils	-0.0366878	0.694256
MTOR_mut	ESCA	Gamma delta T cell	0.0707983	0.450171
MTOR_mut	ESCA	iDC	0.0470003	0.64428
MTOR_mut	ESCA	Macrophages	-0.0207776	0.875381
MTOR_mut	ESCA	Mast cells	0.0249014	0.869611
MTOR_mut	ESCA	Neutrophils	0.0316801	0.812704
MTOR_mut	ESCA	NK CD56bright cells	0.0468787	0.689961
MTOR_mut	ESCA	NK CD56dim cells	0.00949461	0.945774
MTOR_mut	ESCA	Regulatory T cell	-0.0580769	0.741034
MTOR_mut	ESCA	T helper cells	-0.133814	0.136427
MTOR_mut	ESCA	Tcm cells	-0.156858	0.0820205
MTOR_mut	ESCA	Tem cells	0.14128	0.266153
MTOR_mut	ESCA	Tfh cells	-0.111331	0.182138
MYC_AMP	LGG	Activated CD8 T cell	-0.0922634	0.120796
MYC_AMP	UVM	Activated CD8 T cell	0.435351	0.000140402
MYC_AMP	LGG	aDC	-0.0823068	0.218888
MYC_AMP	UVM	aDC	0.239747	0.133892
MYC_AMP	LGG	B cells	-0.0351614	0.308812
MYC_AMP	UVM	B cells	0.165954	0.00517438
MYC_AMP	LGG	Eosinophils	9.97546e-05	0.996929
MYC_AMP	UVM	Eosinophils	-0.0777399	0.201753
MYC_AMP	LGG	Gamma delta T cell	-0.0494161	0.274006
MYC_AMP	UVM	Gamma delta T cell	0.119058	0.0617334
MYC_AMP	LGG	iDC	-0.0356317	0.381949
MYC_AMP	UVM	iDC	0.191313	0.0734579
MYC_AMP	LGG	Macrophages	-0.0448702	0.396993
MYC_AMP	UVM	Macrophages	0.210585	0.0230342
MYC_AMP	LGG	Mast cells	-0.0579714	0.131479
MYC_AMP	UVM	Mast cells	0.109158	0.125451
MYC_AMP	LGG	Neutrophils	-0.0824912	0.125577
MYC_AMP	UVM	Neutrophils	0.181436	0.0547066
MYC_AMP	LGG	NK CD56bright cells	0.051692	0.355875
MYC_AMP	UVM	NK CD56bright cells	0.0672968	0.468538
MYC_AMP	LGG	NK CD56dim cells	-0.14113	0.0222489
MYC_AMP	UVM	NK CD56dim cells	0.450334	0.000709453
MYC_AMP	LGG	Regulatory T cell	-0.083163	0.139396
MYC_AMP	UVM	Regulatory T cell	0.148471	0.226134
MYC_AMP	LGG	T helper cells	-0.00696585	0.8686
MYC_AMP	UVM	T helper cells	0.0287082	0.781442
MYC_AMP	LGG	Tcm cells	-0.0372982	0.406601
MYC_AMP	UVM	Tcm cells	-0.0694418	0.512702
MYC_AMP	LGG	Tem cells	0.00505899	0.900147
MYC_AMP	UVM	Tem cells	0.129887	0.144172
MYC_AMP	LGG	Tfh cells	0.0224376	0.388144
MYC_AMP	UVM	Tfh cells	0.268049	0.000917648
MYH10_mut	SARC	Activated CD8 T cell	-0.0385769	0.802515
MYH10_mut	SARC	aDC	0.122968	0.4887
MYH10_mut	SARC	B cells	0.077542	0.40641
MYH10_mut	SARC	Eosinophils	0.0172916	0.827388
MYH10_mut	SARC	Gamma delta T cell	-0.154287	0.131557
MYH10_mut	SARC	iDC	-0.105515	0.311708
MYH10_mut	SARC	Macrophages	-0.152894	0.239146
MYH10_mut	SARC	Mast cells	-0.0320913	0.71749
MYH10_mut	SARC	Neutrophils	-0.0849211	0.526795
MYH10_mut	SARC	NK CD56bright cells	0.0461875	0.65509
MYH10_mut	SARC	NK CD56dim cells	0.0685085	0.647864
MYH10_mut	SARC	Regulatory T cell	-0.10152	0.521358
MYH10_mut	SARC	T helper cells	-0.0734873	0.390369
MYH10_mut	SARC	Tcm cells	0.0372217	0.696942
MYH10_mut	SARC	Tem cells	-0.0396454	0.703771
MYH10_mut	SARC	Tfh cells	-0.172128	0.0727519
MYH9_mut	BLCA	Activated CD8 T cell	0.0848016	0.304703
MYH9_mut	CESC	Activated CD8 T cell	0.257394	0.0874546
MYH9_mut	PAN-CANCER	Activated CD8 T cell	0.0856568	0.00164191
MYH9_mut	BLCA	aDC	0.206387	0.0691165
MYH9_mut	CESC	aDC	0.49203	0.0119218
MYH9_mut	PAN-CANCER	aDC	0.0624009	0.0735418
MYH9_mut	BLCA	B cells	0.101558	0.130779
MYH9_mut	CESC	B cells	0.145513	0.215439
MYH9_mut	PAN-CANCER	B cells	0.0569124	0.00804118
MYH9_mut	BLCA	Eosinophils	-0.00466608	0.905775
MYH9_mut	CESC	Eosinophils	-0.0148413	0.813541
MYH9_mut	PAN-CANCER	Eosinophils	0.00453597	0.749659
MYH9_mut	BLCA	Gamma delta T cell	0.0456066	0.387514
MYH9_mut	CESC	Gamma delta T cell	0.175534	0.0429778
MYH9_mut	PAN-CANCER	Gamma delta T cell	0.041809	0.01895
MYH9_mut	BLCA	iDC	0.0103286	0.853132
MYH9_mut	CESC	iDC	0.102459	0.303167
MYH9_mut	PAN-CANCER	iDC	0.0260101	0.186109
MYH9_mut	BLCA	Macrophages	0.107597	0.222522
MYH9_mut	CESC	Macrophages	0.322755	0.00684911
MYH9_mut	PAN-CANCER	Macrophages	0.0746029	0.00319146
MYH9_mut	BLCA	Mast cells	-0.0663398	0.369665
MYH9_mut	CESC	Mast cells	-0.0623441	0.580074
MYH9_mut	PAN-CANCER	Mast cells	-0.0237401	0.293244
MYH9_mut	BLCA	Neutrophils	0.0929308	0.230403
MYH9_mut	CESC	Neutrophils	0.155791	0.182069
MYH9_mut	PAN-CANCER	Neutrophils	0.0459003	0.0558206
MYH9_mut	BLCA	NK CD56bright cells	-0.130625	0.0851643
MYH9_mut	CESC	NK CD56bright cells	-0.0493727	0.672397
MYH9_mut	PAN-CANCER	NK CD56bright cells	0.0030484	0.88957
MYH9_mut	BLCA	NK CD56dim cells	0.0719185	0.388956
MYH9_mut	CESC	NK CD56dim cells	0.230705	0.089223
MYH9_mut	PAN-CANCER	NK CD56dim cells	0.0774852	0.00492102
MYH9_mut	BLCA	Regulatory T cell	0.218186	0.0502852
MYH9_mut	CESC	Regulatory T cell	0.442892	0.0050919
MYH9_mut	PAN-CANCER	Regulatory T cell	0.122416	5.07491e-05
MYH9_mut	BLCA	T helper cells	0.11064	0.0486855
MYH9_mut	CESC	T helper cells	0.0139248	0.885439
MYH9_mut	PAN-CANCER	T helper cells	0.0586224	0.00196893
MYH9_mut	BLCA	Tcm cells	0.0824829	0.133113
MYH9_mut	CESC	Tcm cells	0.11936	0.181518
MYH9_mut	PAN-CANCER	Tcm cells	0.0337911	0.0845197
MYH9_mut	BLCA	Tem cells	0.124614	0.0447632
MYH9_mut	CESC	Tem cells	0.247379	0.0135487
MYH9_mut	PAN-CANCER	Tem cells	0.0543502	0.0104253
MYH9_mut	BLCA	Tfh cells	0.0922094	0.0311454
MYH9_mut	CESC	Tfh cells	0.150308	0.0809002
MYH9_mut	PAN-CANCER	Tfh cells	0.0133422	0.39038
NF1_mut	GBM	Activated CD8 T cell	0.0681238	0.513262
NF1_mut	LGG	Activated CD8 T cell	0.0927203	0.152097
NF1_mut	PCPG	Activated CD8 T cell	0.000398936	0.996705
NF1_mut	GBM	aDC	0.088886	0.467171
NF1_mut	LGG	aDC	0.229114	0.00189279
NF1_mut	PCPG	aDC	-0.0297415	0.795265
NF1_mut	GBM	B cells	-0.00809943	0.901678
NF1_mut	LGG	B cells	0.0107258	0.779476
NF1_mut	PCPG	B cells	0.0059716	0.93083
NF1_mut	GBM	Eosinophils	0.0172396	0.7228
NF1_mut	LGG	Eosinophils	0.127735	5.99939e-06
NF1_mut	PCPG	Eosinophils	-0.0229049	0.61979
NF1_mut	GBM	Gamma delta T cell	0.129508	0.0900695
NF1_mut	LGG	Gamma delta T cell	0.0664449	0.180125
NF1_mut	PCPG	Gamma delta T cell	-0.129024	0.0465481
NF1_mut	GBM	iDC	0.238876	0.000824946
NF1_mut	LGG	iDC	0.144596	0.00113307
NF1_mut	PCPG	iDC	-0.0495369	0.472338
NF1_mut	GBM	Macrophages	0.328207	0.00074018
NF1_mut	LGG	Macrophages	0.159513	0.00583915
NF1_mut	PCPG	Macrophages	-0.043629	0.620803
NF1_mut	GBM	Mast cells	0.0172243	0.778169
NF1_mut	LGG	Mast cells	0.0852209	0.0432882
NF1_mut	PCPG	Mast cells	-0.0900781	0.172594
NF1_mut	GBM	Neutrophils	0.318667	0.000821575
NF1_mut	LGG	Neutrophils	0.215425	0.000220641
NF1_mut	PCPG	Neutrophils	-0.100496	0.259984
NF1_mut	GBM	NK CD56bright cells	0.103773	0.181692
NF1_mut	LGG	NK CD56bright cells	0.0516677	0.428817
NF1_mut	PCPG	NK CD56bright cells	0.1342	0.0902883
NF1_mut	GBM	NK CD56dim cells	0.114085	0.217895
NF1_mut	LGG	NK CD56dim cells	0.0483777	0.467406
NF1_mut	PCPG	NK CD56dim cells	-0.0701306	0.497091
NF1_mut	GBM	Regulatory T cell	0.362991	0.000688564
NF1_mut	LGG	Regulatory T cell	0.21595	0.000468537
NF1_mut	PCPG	Regulatory T cell	-0.0613116	0.543692
NF1_mut	GBM	T helper cells	-0.0087689	0.884408
NF1_mut	LGG	T helper cells	-0.0125689	0.787875
NF1_mut	PCPG	T helper cells	-0.0113595	0.827091
NF1_mut	GBM	Tcm cells	0.0688731	0.368703
NF1_mut	LGG	Tcm cells	-0.0529082	0.280718
NF1_mut	PCPG	Tcm cells	0.039347	0.518181
NF1_mut	GBM	Tem cells	-0.004158	0.963275
NF1_mut	LGG	Tem cells	-0.066372	0.134379
NF1_mut	PCPG	Tem cells	-0.00870127	0.904805
NF1_mut	GBM	Tfh cells	-0.0150186	0.771169
NF1_mut	LGG	Tfh cells	-8.43589e-05	0.997626
NF1_mut	PCPG	Tfh cells	0.00329284	0.948112
NF2_DEL	MESO	Activated CD8 T cell	-0.24791	0.0802716
NF2_DEL	MESO	aDC	-0.384322	0.035275
NF2_DEL	MESO	B cells	-0.0257047	0.827709
NF2_DEL	MESO	Eosinophils	-0.111494	0.143472
NF2_DEL	MESO	Gamma delta T cell	-0.0855396	0.212593
NF2_DEL	MESO	iDC	-0.098821	0.264065
NF2_DEL	MESO	Macrophages	-0.048727	0.655176
NF2_DEL	MESO	Mast cells	-0.0548892	0.570574
NF2_DEL	MESO	Neutrophils	-0.134713	0.273922
NF2_DEL	MESO	NK CD56bright cells	-0.277776	0.0135073
NF2_DEL	MESO	NK CD56dim cells	-0.268608	0.0572413
NF2_DEL	MESO	Regulatory T cell	-0.163534	0.300561
NF2_DEL	MESO	T helper cells	0.0491429	0.614355
NF2_DEL	MESO	Tcm cells	-0.0199118	0.850633
NF2_DEL	MESO	Tem cells	-0.0827976	0.407898
NF2_DEL	MESO	Tfh cells	0.111203	0.176148
NF2_mut	MESO	Activated CD8 T cell	0.0875532	0.337805
NF2_mut	MESO	aDC	0.0221102	0.852669
NF2_mut	MESO	B cells	0.0440241	0.587732
NF2_mut	MESO	Eosinophils	-0.0671455	0.165583
NF2_mut	MESO	Gamma delta T cell	-0.0109875	0.80962
NF2_mut	MESO	iDC	0.0552606	0.338267
NF2_mut	MESO	Macrophages	-0.0180657	0.793617
NF2_mut	MESO	Mast cells	-0.079785	0.219198
NF2_mut	MESO	Neutrophils	-0.0497945	0.524071
NF2_mut	MESO	NK CD56bright cells	0.0293944	0.701375
NF2_mut	MESO	NK CD56dim cells	0.0183346	0.841005
NF2_mut	MESO	Regulatory T cell	0.169618	0.0836296
NF2_mut	MESO	T helper cells	0.107888	0.087377
NF2_mut	MESO	Tcm cells	-0.0109533	0.872544
NF2_mut	MESO	Tem cells	0.0657225	0.315247
NF2_mut	MESO	Tfh cells	0.0696148	0.192849
NOTCH1_mut	ESCA	Activated CD8 T cell	-0.113966	0.258671
NOTCH1_mut	HNSC	Activated CD8 T cell	0.0911014	0.0418286
NOTCH1_mut	LGG	Activated CD8 T cell	-0.0892018	0.197657
NOTCH1_mut	ESCA	aDC	0.102908	0.448086
NOTCH1_mut	HNSC	aDC	0.131959	0.0287376
NOTCH1_mut	LGG	aDC	-0.0364103	0.645846
NOTCH1_mut	ESCA	B cells	-0.042838	0.595203
NOTCH1_mut	HNSC	B cells	0.0237935	0.496015
NOTCH1_mut	LGG	B cells	0.0830248	0.0422579
NOTCH1_mut	ESCA	Eosinophils	-0.125524	0.0635518
NOTCH1_mut	HNSC	Eosinophils	0.0328078	0.143734
NOTCH1_mut	LGG	Eosinophils	0.0295626	0.331906
NOTCH1_mut	ESCA	Gamma delta T cell	0.0837352	0.219451
NOTCH1_mut	HNSC	Gamma delta T cell	0.101498	0.000538493
NOTCH1_mut	LGG	Gamma delta T cell	-0.111143	0.0357797
NOTCH1_mut	ESCA	iDC	0.0798716	0.280646
NOTCH1_mut	HNSC	iDC	0.0440723	0.189493
NOTCH1_mut	LGG	iDC	-0.039031	0.413521
NOTCH1_mut	ESCA	Macrophages	0.123998	0.197704
NOTCH1_mut	HNSC	Macrophages	0.0620956	0.136906
NOTCH1_mut	LGG	Macrophages	-0.107269	0.0836823
NOTCH1_mut	ESCA	Mast cells	-0.0975713	0.376618
NOTCH1_mut	HNSC	Mast cells	0.0558219	0.200016
NOTCH1_mut	LGG	Mast cells	0.109259	0.0153017
NOTCH1_mut	ESCA	Neutrophils	-0.039782	0.68282
NOTCH1_mut	HNSC	Neutrophils	0.0955396	0.0185776
NOTCH1_mut	LGG	Neutrophils	-0.0746024	0.234373
NOTCH1_mut	ESCA	NK CD56bright cells	-0.2068	0.0148485
NOTCH1_mut	HNSC	NK CD56bright cells	-0.0416723	0.165671
NOTCH1_mut	LGG	NK CD56bright cells	0.201726	0.00373109
NOTCH1_mut	ESCA	NK CD56dim cells	-0.00113376	0.991102
NOTCH1_mut	HNSC	NK CD56dim cells	0.112291	0.0122517
NOTCH1_mut	LGG	NK CD56dim cells	0.124348	0.0802903
NOTCH1_mut	ESCA	Regulatory T cell	0.126484	0.322403
NOTCH1_mut	HNSC	Regulatory T cell	0.106897	0.0291862
NOTCH1_mut	LGG	Regulatory T cell	-0.0841545	0.204737
NOTCH1_mut	ESCA	T helper cells	0.0204783	0.75503
NOTCH1_mut	HNSC	T helper cells	0.0245084	0.382945
NOTCH1_mut	LGG	T helper cells	0.0390225	0.434544
NOTCH1_mut	ESCA	Tcm cells	0.000683931	0.991728
NOTCH1_mut	HNSC	Tcm cells	-0.0083816	0.764276
NOTCH1_mut	LGG	Tcm cells	0.055313	0.291603
NOTCH1_mut	ESCA	Tem cells	-0.122856	0.183928
NOTCH1_mut	HNSC	Tem cells	0.00209666	0.954606
NOTCH1_mut	LGG	Tem cells	0.0601021	0.205024
NOTCH1_mut	ESCA	Tfh cells	-0.0354895	0.56001
NOTCH1_mut	HNSC	Tfh cells	-0.00979337	0.730179
NOTCH1_mut	LGG	Tfh cells	0.0760366	0.0118565
NRAS_mut	PAN-CANCER	Activated CD8 T cell	-0.102366	2.3863e-05
NRAS_mut	THCA	Activated CD8 T cell	-0.258571	2.98438e-05
NRAS_mut	PAN-CANCER	aDC	-0.144996	2.99919e-06
NRAS_mut	THCA	aDC	-0.420605	3.53991e-08
NRAS_mut	PAN-CANCER	B cells	-0.0219099	0.252056
NRAS_mut	THCA	B cells	-0.039099	0.374634
NRAS_mut	PAN-CANCER	Eosinophils	0.00175405	0.889816
NRAS_mut	THCA	Eosinophils	-0.0487406	0.0974335
NRAS_mut	PAN-CANCER	Gamma delta T cell	-0.0818486	2.46043e-07
NRAS_mut	THCA	Gamma delta T cell	-0.262772	5.66361e-10
NRAS_mut	PAN-CANCER	iDC	-0.0792538	6.02063e-06
NRAS_mut	THCA	iDC	-0.193083	1.53819e-06
NRAS_mut	PAN-CANCER	Macrophages	-0.119726	1.06088e-07
NRAS_mut	THCA	Macrophages	-0.432319	5.40076e-13
NRAS_mut	PAN-CANCER	Mast cells	-0.0479087	0.0172331
NRAS_mut	THCA	Mast cells	-0.108659	0.0187777
NRAS_mut	PAN-CANCER	Neutrophils	-0.0930921	1.32051e-05
NRAS_mut	THCA	Neutrophils	-0.297654	1.82932e-08
NRAS_mut	PAN-CANCER	NK CD56bright cells	-0.0293335	0.133571
NRAS_mut	THCA	NK CD56bright cells	-0.132892	0.00678709
NRAS_mut	PAN-CANCER	NK CD56dim cells	-0.0845561	0.000569258
NRAS_mut	THCA	NK CD56dim cells	-0.0594568	0.320728
NRAS_mut	PAN-CANCER	Regulatory T cell	-0.121525	6.27406e-06
NRAS_mut	THCA	Regulatory T cell	-0.436506	6.2617e-11
NRAS_mut	PAN-CANCER	T helper cells	0.00796966	0.636737
NRAS_mut	THCA	T helper cells	-0.0837475	0.0342925
NRAS_mut	PAN-CANCER	Tcm cells	0.0174332	0.317722
NRAS_mut	THCA	Tcm cells	-0.146868	0.000520261
NRAS_mut	PAN-CANCER	Tem cells	-0.0203444	0.281791
NRAS_mut	THCA	Tem cells	-0.0880986	0.0356608
NRAS_mut	PAN-CANCER	Tfh cells	-0.0254212	0.0661271
NRAS_mut	THCA	Tfh cells	0.0289084	0.420093
PBRM1_mut	KIRC	Activated CD8 T cell	-0.0338757	0.43034
PBRM1_mut	KIRP	Activated CD8 T cell	0.00897542	0.938332
PBRM1_mut	KIRC	aDC	0.0765001	0.128546
PBRM1_mut	KIRP	aDC	0.0489228	0.741109
PBRM1_mut	KIRC	B cells	-0.0536235	0.0449852
PBRM1_mut	KIRP	B cells	-0.0961816	0.193667
PBRM1_mut	KIRC	Eosinophils	0.0319904	0.0942502
PBRM1_mut	KIRP	Eosinophils	-0.095417	0.102267
PBRM1_mut	KIRC	Gamma delta T cell	0.00795663	0.753298
PBRM1_mut	KIRP	Gamma delta T cell	-0.0301227	0.713577
PBRM1_mut	KIRC	iDC	-0.0395046	0.114653
PBRM1_mut	KIRP	iDC	-0.0627438	0.492307
PBRM1_mut	KIRC	Macrophages	-0.0942724	0.00850283
PBRM1_mut	KIRP	Macrophages	-0.0403059	0.727066
PBRM1_mut	KIRC	Mast cells	-0.000519897	0.987068
[truncated: 945 more rows]
