# Supplementary material for: A Pan-cancer Landscape of Interactions between Solid Tumors and Infiltrating Immune Cell Populations
Source: Oxford University Press journal article supplement (doi:10.1158/1078-0432.ccr-17-3509), 2018-04-17
Supplement: 10780432ccr173509-sup-192911_3_supp_4675341_p6rxmz.xls [file 10780432ccr173509-sup-192911_3_supp_4675341_p6rxmz.xls]

## Sheet: regression
tumor_type	event	Immune-phenotye	OR	model_empirical_pval	model_empirical_qval
ACC	ABCB1_mut	1	0	0.118395	0.789969
ACC	ABCB1_mut	2	0	0.118395	0.789969
ACC	ABCB1_mut	3	0	0.118395	0.789969
ACC	ABCB1_mut	4	0	0.118395	0.789969
ACC	ABCB1_mut	5	0	0.118395	0.789969
ACC	ABCB1_mut	6	10	0.118395	0.789969
ACC	ABCB4_mut	1	0	0.432735	0.789969
ACC	ABCB4_mut	2	10	0.432735	0.789969
ACC	ABCB4_mut	3	0	0.432735	0.789969
ACC	ABCB4_mut	4	0	0.432735	0.789969
ACC	ABCB4_mut	5	0	0.432735	0.789969
ACC	ABCB4_mut	6	0	0.432735	0.789969
ACC	ACACA_mut	1	0	0.432735	0.789969
ACC	ACACA_mut	2	10	0.432735	0.789969
ACC	ACACA_mut	3	0	0.432735	0.789969
ACC	ACACA_mut	4	0	0.432735	0.789969
ACC	ACACA_mut	5	0	0.432735	0.789969
ACC	ACACA_mut	6	0	0.432735	0.789969
ACC	ACO1_mut	1	0	0.432735	0.789969
ACC	ACO1_mut	2	10	0.432735	0.789969
ACC	ACO1_mut	3	0	0.432735	0.789969
ACC	ACO1_mut	4	0	0.432735	0.789969
ACC	ACO1_mut	5	0	0.432735	0.789969
ACC	ACO1_mut	6	0	0.432735	0.789969
ACC	ACVR1_mut	1	0	0.118395	0.789969
ACC	ACVR1_mut	2	0	0.118395	0.789969
ACC	ACVR1_mut	3	0	0.118395	0.789969
ACC	ACVR1_mut	4	0	0.118395	0.789969
ACC	ACVR1_mut	5	0	0.118395	0.789969
ACC	ACVR1_mut	6	10	0.118395	0.789969
ACC	AKT2_AMP	1	0	0.807889	0.993419
ACC	AKT2_AMP	2	0	0.807889	0.993419
ACC	AKT2_AMP	3	10	0.807889	0.993419
ACC	AKT2_AMP	4	0	0.807889	0.993419
ACC	AKT2_AMP	5	0	0.807889	0.993419
ACC	AKT2_AMP	6	0	0.807889	0.993419
ACC	APAF1_mut	1	10	0.977309	0.993419
ACC	APAF1_mut	2	0	0.977309	0.993419
ACC	APAF1_mut	3	0	0.977309	0.993419
ACC	APAF1_mut	4	0	0.977309	0.993419
ACC	APAF1_mut	5	0	0.977309	0.993419
ACC	APAF1_mut	6	0	0.977309	0.993419
ACC	ARAP3_mut	1	0	0.469847	0.789969
ACC	ARAP3_mut	2	0	0.469847	0.789969
ACC	ARAP3_mut	3	0	0.469847	0.789969
ACC	ARAP3_mut	4	10	0.469847	0.789969
ACC	ARAP3_mut	5	0	0.469847	0.789969
ACC	ARAP3_mut	6	0	0.469847	0.789969
ACC	ARFGEF2_mut	1	0	0.327854	0.789969
ACC	ARFGEF2_mut	2	0	0.327854	0.789969
ACC	ARFGEF2_mut	3	0	0.327854	0.789969
ACC	ARFGEF2_mut	4	0	0.327854	0.789969
ACC	ARFGEF2_mut	5	10	0.327854	0.789969
ACC	ARFGEF2_mut	6	0	0.327854	0.789969
ACC	ARG1_AMP	1	4.38462	0.891499	0.993419
ACC	ARG1_AMP	2	0	0.891499	0.993419
ACC	ARG1_AMP	3	3.375	0.891499	0.993419
ACC	ARG1_AMP	4	0	0.891499	0.993419
ACC	ARG1_AMP	5	0	0.891499	0.993419
ACC	ARG1_AMP	6	0	0.891499	0.993419
ACC	ARG2_AMP	1	0	0.51621	0.805909
ACC	ARG2_AMP	2	0	0.51621	0.805909
ACC	ARG2_AMP	3	0	0.51621	0.805909
ACC	ARG2_AMP	4	10	0.51621	0.805909
ACC	ARG2_AMP	5	0	0.51621	0.805909
ACC	ARG2_AMP	6	0	0.51621	0.805909
ACC	ARHGAP26_mut	1	0	0.432735	0.789969
ACC	ARHGAP26_mut	2	10	0.432735	0.789969
ACC	ARHGAP26_mut	3	0	0.432735	0.789969
ACC	ARHGAP26_mut	4	0	0.432735	0.789969
ACC	ARHGAP26_mut	5	0	0.432735	0.789969
ACC	ARHGAP26_mut	6	0	0.432735	0.789969
ACC	ARID4A_mut	1	10	0.939794	0.993419
ACC	ARID4A_mut	2	0	0.939794	0.993419
ACC	ARID4A_mut	3	0	0.939794	0.993419
ACC	ARID4A_mut	4	0	0.939794	0.993419
ACC	ARID4A_mut	5	0	0.939794	0.993419
ACC	ARID4A_mut	6	0	0.939794	0.993419
ACC	ARID4B_mut	1	0	0.44282	0.789969
ACC	ARID4B_mut	2	0	0.44282	0.789969
ACC	ARID4B_mut	3	0	0.44282	0.789969
ACC	ARID4B_mut	4	0	0.44282	0.789969
ACC	ARID4B_mut	5	10	0.44282	0.789969
ACC	ARID4B_mut	6	0	0.44282	0.789969
ACC	ARID5B_mut	1	0	0.432735	0.789969
ACC	ARID5B_mut	2	10	0.432735	0.789969
ACC	ARID5B_mut	3	0	0.432735	0.789969
ACC	ARID5B_mut	4	0	0.432735	0.789969
ACC	ARID5B_mut	5	0	0.432735	0.789969
ACC	ARID5B_mut	6	0	0.432735	0.789969
ACC	ASH1L_mut	1	0	0.531464	0.805909
ACC	ASH1L_mut	2	0	0.531464	0.805909
ACC	ASH1L_mut	3	10	0.531464	0.805909
ACC	ASH1L_mut	4	0	0.531464	0.805909
ACC	ASH1L_mut	5	0	0.531464	0.805909
ACC	ASH1L_mut	6	0	0.531464	0.805909
ACC	ASPM_mut	1	0	0.656212	0.899254
ACC	ASPM_mut	2	0	0.656212	0.899254
ACC	ASPM_mut	3	10	0.656212	0.899254
ACC	ASPM_mut	4	0	0.656212	0.899254
ACC	ASPM_mut	5	0	0.656212	0.899254
ACC	ASPM_mut	6	0	0.656212	0.899254
ACC	ASXL1_mut	1	0	0.469847	0.789969
ACC	ASXL1_mut	2	0	0.469847	0.789969
ACC	ASXL1_mut	3	0	0.469847	0.789969
ACC	ASXL1_mut	4	10	0.469847	0.789969
ACC	ASXL1_mut	5	0	0.469847	0.789969
ACC	ASXL1_mut	6	0	0.469847	0.789969
ACC	ATM_mut	1	9.84615	0.257967	0.789969
ACC	ATM_mut	2	0	0.257967	0.789969
ACC	ATM_mut	3	1.52632	0.257967	0.789969
ACC	ATM_mut	4	0	0.257967	0.789969
ACC	ATM_mut	5	0	0.257967	0.789969
ACC	ATM_mut	6	0	0.257967	0.789969
ACC	ATRX_mut	1	1.64103	0.0229931	0.735075
ACC	ATRX_mut	2	7.55556	0.0229931	0.735075
ACC	ATRX_mut	3	0	0.0229931	0.735075
ACC	ATRX_mut	4	0	0.0229931	0.735075
ACC	ATRX_mut	5	0	0.0229931	0.735075
ACC	ATRX_mut	6	2.23333	0.0229931	0.735075
ACC	ATR_mut	1	10	0.947257	0.993419
ACC	ATR_mut	2	0	0.947257	0.993419
ACC	ATR_mut	3	0	0.947257	0.993419
ACC	ATR_mut	4	0	0.947257	0.993419
ACC	ATR_mut	5	0	0.947257	0.993419
ACC	ATR_mut	6	0	0.947257	0.993419
ACC	AURKA_AMP	1	0	0.438422	0.789969
ACC	AURKA_AMP	2	0	0.438422	0.789969
ACC	AURKA_AMP	3	0	0.438422	0.789969
ACC	AURKA_AMP	4	0	0.438422	0.789969
ACC	AURKA_AMP	5	10	0.438422	0.789969
ACC	AURKA_AMP	6	0	0.438422	0.789969
ACC	B2M_DEL	1	10	0.998294	0.998595
ACC	B2M_DEL	2	0	0.998294	0.998595
ACC	B2M_DEL	3	0	0.998294	0.998595
ACC	B2M_DEL	4	0	0.998294	0.998595
ACC	B2M_DEL	5	0	0.998294	0.998595
ACC	B2M_DEL	6	0	0.998294	0.998595
ACC	BCOR_mut	1	10	0.901372	0.993419
ACC	BCOR_mut	2	0	0.901372	0.993419
ACC	BCOR_mut	3	0	0.901372	0.993419
ACC	BCOR_mut	4	0	0.901372	0.993419
ACC	BCOR_mut	5	0	0.901372	0.993419
ACC	BCOR_mut	6	0	0.901372	0.993419
ACC	BRAF_mut	1	0	0.118395	0.789969
ACC	BRAF_mut	2	0	0.118395	0.789969
ACC	BRAF_mut	3	0	0.118395	0.789969
ACC	BRAF_mut	4	0	0.118395	0.789969
ACC	BRAF_mut	5	0	0.118395	0.789969
ACC	BRAF_mut	6	10	0.118395	0.789969
ACC	BRCA1_DEL	1	4.38462	0.386932	0.789969
ACC	BRCA1_DEL	2	7.75	0.386932	0.789969
ACC	BRCA1_DEL	3	0	0.386932	0.789969
ACC	BRCA1_DEL	4	0	0.386932	0.789969
ACC	BRCA1_DEL	5	0	0.386932	0.789969
ACC	BRCA1_DEL	6	0	0.386932	0.789969
ACC	CASP8_mut	1	0	0.560206	0.835791
ACC	CASP8_mut	2	0	0.560206	0.835791
ACC	CASP8_mut	3	10	0.560206	0.835791
ACC	CASP8_mut	4	0	0.560206	0.835791
ACC	CASP8_mut	5	0	0.560206	0.835791
ACC	CASP8_mut	6	0	0.560206	0.835791
ACC	CCAR1_mut	1	10	0.977309	0.993419
ACC	CCAR1_mut	2	0	0.977309	0.993419
ACC	CCAR1_mut	3	0	0.977309	0.993419
ACC	CCAR1_mut	4	0	0.977309	0.993419
ACC	CCAR1_mut	5	0	0.977309	0.993419
ACC	CCAR1_mut	6	0	0.977309	0.993419
ACC	CCND2_AMP	1	10	0.998595	0.998595
ACC	CCND2_AMP	2	0	0.998595	0.998595
ACC	CCND2_AMP	3	0	0.998595	0.998595
ACC	CCND2_AMP	4	0	0.998595	0.998595
ACC	CCND2_AMP	5	0	0.998595	0.998595
ACC	CCND2_AMP	6	0	0.998595	0.998595
ACC	CCND3_AMP	1	0	0.265884	0.789969
ACC	CCND3_AMP	2	0	0.265884	0.789969
ACC	CCND3_AMP	3	0	0.265884	0.789969
ACC	CCND3_AMP	4	0	0.265884	0.789969
ACC	CCND3_AMP	5	0	0.265884	0.789969
ACC	CCND3_AMP	6	10	0.265884	0.789969
ACC	CCNE1_AMP	1	8.76923	0.828164	0.993419
ACC	CCNE1_AMP	2	0	0.828164	0.993419
ACC	CCNE1_AMP	3	1.6875	0.828164	0.993419
ACC	CCNE1_AMP	4	0	0.828164	0.993419
ACC	CCNE1_AMP	5	0	0.828164	0.993419
ACC	CCNE1_AMP	6	0	0.828164	0.993419
ACC	CDC73_mut	1	0	0.372126	0.789969
ACC	CDC73_mut	2	0	0.372126	0.789969
ACC	CDC73_mut	3	0	0.372126	0.789969
ACC	CDC73_mut	4	10	0.372126	0.789969
ACC	CDC73_mut	5	0	0.372126	0.789969
ACC	CDC73_mut	6	0	0.372126	0.789969
ACC	CDK2_AMP	1	4.38462	0.412024	0.789969
ACC	CDK2_AMP	2	0	0.412024	0.789969
ACC	CDK2_AMP	3	0	0.412024	0.789969
ACC	CDK2_AMP	4	0	0.412024	0.789969
ACC	CDK2_AMP	5	0	0.412024	0.789969
ACC	CDK2_AMP	6	7.75	0.412024	0.789969
ACC	CDK5_AMP	1	0	0.508481	0.805909
ACC	CDK5_AMP	2	0	0.508481	0.805909
ACC	CDK5_AMP	3	0	0.508481	0.805909
ACC	CDK5_AMP	4	10	0.508481	0.805909
ACC	CDK5_AMP	5	0	0.508481	0.805909
ACC	CDK5_AMP	6	0	0.508481	0.805909
ACC	CDK6_AMP	1	4.38462	0.380809	0.789969
ACC	CDK6_AMP	2	0	0.380809	0.789969
ACC	CDK6_AMP	3	0	0.380809	0.789969
ACC	CDK6_AMP	4	0	0.380809	0.789969
ACC	CDK6_AMP	5	0	0.380809	0.789969
ACC	CDK6_AMP	6	7.75	0.380809	0.789969
ACC	CDKN2A_DEL	1	1.09615	0.0850146	0.789969
ACC	CDKN2A_DEL	2	0	0.0850146	0.789969
ACC	CDKN2A_DEL	3	5.0625	0.0850146	0.789969
ACC	CDKN2A_DEL	4	1.20833	0.0850146	0.789969
ACC	CDKN2A_DEL	5	0	0.0850146	0.789969
ACC	CDKN2A_DEL	6	0	0.0850146	0.789969
ACC	CDKN2A_mut	1	10	0.944534	0.993419
ACC	CDKN2A_mut	2	0	0.944534	0.993419
ACC	CDKN2A_mut	3	0	0.944534	0.993419
ACC	CDKN2A_mut	4	0	0.944534	0.993419
ACC	CDKN2A_mut	5	0	0.944534	0.993419
ACC	CDKN2A_mut	6	0	0.944534	0.993419
ACC	CDKN2B_DEL	1	0	0.127974	0.789969
ACC	CDKN2B_DEL	2	0	0.127974	0.789969
ACC	CDKN2B_DEL	3	6.75	0.127974	0.789969
ACC	CDKN2B_DEL	4	2.41667	0.127974	0.789969
ACC	CDKN2B_DEL	5	0	0.127974	0.789969
ACC	CDKN2B_DEL	6	0	0.127974	0.789969
ACC	CDKN2C_DEL	1	0	0.396868	0.789969
ACC	CDKN2C_DEL	2	0	0.396868	0.789969
ACC	CDKN2C_DEL	3	0	0.396868	0.789969
ACC	CDKN2C_DEL	4	0	0.396868	0.789969
ACC	CDKN2C_DEL	5	0	0.396868	0.789969
ACC	CDKN2C_DEL	6	10	0.396868	0.789969
ACC	CEACAM1_AMP	1	0	0.807889	0.993419
ACC	CEACAM1_AMP	2	0	0.807889	0.993419
ACC	CEACAM1_AMP	3	10	0.807889	0.993419
ACC	CEACAM1_AMP	4	0	0.807889	0.993419
ACC	CEACAM1_AMP	5	0	0.807889	0.993419
ACC	CEACAM1_AMP	6	0	0.807889	0.993419
ACC	CEP290_mut	1	0	0.473981	0.789969
ACC	CEP290_mut	2	0	0.473981	0.789969
ACC	CEP290_mut	3	0	0.473981	0.789969
ACC	CEP290_mut	4	10	0.473981	0.789969
ACC	CEP290_mut	5	0	0.473981	0.789969
ACC	CEP290_mut	6	0	0.473981	0.789969
ACC	CHD2_mut	1	2.46154	0.0140177	0.735075
ACC	CHD2_mut	2	0	0.0140177	0.735075
ACC	CHD2_mut	3	0	0.0140177	0.735075
ACC	CHD2_mut	4	0	0.0140177	0.735075
ACC	CHD2_mut	5	0	0.0140177	0.735075
ACC	CHD2_mut	6	13.4	0.0140177	0.735075
ACC	CHEK2_DEL	1	4.38462	0.891599	0.993419
ACC	CHEK2_DEL	2	0	0.891599	0.993419
ACC	CHEK2_DEL	3	3.375	0.891599	0.993419
ACC	CHEK2_DEL	4	0	0.891599	0.993419
ACC	CHEK2_DEL	5	0	0.891599	0.993419
ACC	CHEK2_DEL	6	0	0.891599	0.993419
ACC	CHEK2_mut	1	4.92308	0.443021	0.789969
ACC	CHEK2_mut	2	7.55556	0.443021	0.789969
ACC	CHEK2_mut	3	0	0.443021	0.789969
ACC	CHEK2_mut	4	0	0.443021	0.789969
ACC	CHEK2_mut	5	0	0.443021	0.789969
ACC	CHEK2_mut	6	0	0.443021	0.789969
ACC	CLCN2_mut	1	0	0.166095	0.789969
ACC	CLCN2_mut	2	0	0.166095	0.789969
ACC	CLCN2_mut	3	0	0.166095	0.789969
ACC	CLCN2_mut	4	0	0.166095	0.789969
ACC	CLCN2_mut	5	0	0.166095	0.789969
ACC	CLCN2_mut	6	10	0.166095	0.789969
ACC	CLOCK_mut	1	10	0.977309	0.993419
ACC	CLOCK_mut	2	0	0.977309	0.993419
ACC	CLOCK_mut	3	0	0.977309	0.993419
ACC	CLOCK_mut	4	0	0.977309	0.993419
ACC	CLOCK_mut	5	0	0.977309	0.993419
ACC	CLOCK_mut	6	0	0.977309	0.993419
ACC	CNTNAP1_mut	1	0	0.469847	0.789969
ACC	CNTNAP1_mut	2	0	0.469847	0.789969
ACC	CNTNAP1_mut	3	0	0.469847	0.789969
ACC	CNTNAP1_mut	4	10	0.469847	0.789969
ACC	CNTNAP1_mut	5	0	0.469847	0.789969
ACC	CNTNAP1_mut	6	0	0.469847	0.789969
ACC	COPS6_mut	1	10	0.977309	0.993419
ACC	COPS6_mut	2	0	0.977309	0.993419
ACC	COPS6_mut	3	0	0.977309	0.993419
ACC	COPS6_mut	4	0	0.977309	0.993419
ACC	COPS6_mut	5	0	0.977309	0.993419
ACC	COPS6_mut	6	0	0.977309	0.993419
ACC	CR1_mut	1	10	0.901372	0.993419
ACC	CR1_mut	2	0	0.901372	0.993419
ACC	CR1_mut	3	0	0.901372	0.993419
ACC	CR1_mut	4	0	0.901372	0.993419
ACC	CR1_mut	5	0	0.901372	0.993419
ACC	CR1_mut	6	0	0.901372	0.993419
ACC	CSDE1_mut	1	0	0.643102	0.895244
ACC	CSDE1_mut	2	0	0.643102	0.895244
ACC	CSDE1_mut	3	10	0.643102	0.895244
ACC	CSDE1_mut	4	0	0.643102	0.895244
ACC	CSDE1_mut	5	0	0.643102	0.895244
ACC	CSDE1_mut	6	0	0.643102	0.895244
ACC	CSF1R_mut	1	0	0.469847	0.789969
ACC	CSF1R_mut	2	0	0.469847	0.789969
ACC	CSF1R_mut	3	0	0.469847	0.789969
ACC	CSF1R_mut	4	10	0.469847	0.789969
ACC	CSF1R_mut	5	0	0.469847	0.789969
ACC	CSF1R_mut	6	0	0.469847	0.789969
ACC	CTNNB1_mut	1	1.64103	0.0397338	0.735075
ACC	CTNNB1_mut	2	2.51852	0.0397338	0.735075
ACC	CTNNB1_mut	3	1.01754	0.0397338	0.735075
ACC	CTNNB1_mut	4	1.64103	0.0397338	0.735075
ACC	CTNNB1_mut	5	0	0.0397338	0.735075
ACC	CTNNB1_mut	6	0	0.0397338	0.735075
ACC	CUL3_mut	1	0	0.118395	0.789969
ACC	CUL3_mut	2	0	0.118395	0.789969
ACC	CUL3_mut	3	0	0.118395	0.789969
ACC	CUL3_mut	4	0	0.118395	0.789969
ACC	CUL3_mut	5	0	0.118395	0.789969
ACC	CUL3_mut	6	10	0.118395	0.789969
ACC	CUL4A_mut	1	0	0.432735	0.789969
ACC	CUL4A_mut	2	10	0.432735	0.789969
ACC	CUL4A_mut	3	0	0.432735	0.789969
ACC	CUL4A_mut	4	0	0.432735	0.789969
ACC	CUL4A_mut	5	0	0.432735	0.789969
ACC	CUL4A_mut	6	0	0.432735	0.789969
ACC	DAXX_mut	1	0	0.0902582	0.789969
ACC	DAXX_mut	2	3.77778	0.0902582	0.789969
ACC	DAXX_mut	3	0	0.0902582	0.789969
ACC	DAXX_mut	4	2.46154	0.0902582	0.789969
ACC	DAXX_mut	5	2.46154	0.0902582	0.789969
ACC	DAXX_mut	6	0	0.0902582	0.789969
ACC	DICER1_mut	1	0	0.143909	0.789969
ACC	DICER1_mut	2	10	0.143909	0.789969
ACC	DICER1_mut	3	0	0.143909	0.789969
ACC	DICER1_mut	4	0	0.143909	0.789969
ACC	DICER1_mut	5	0	0.143909	0.789969
ACC	DICER1_mut	6	0	0.143909	0.789969
ACC	DLC1_mut	1	4.92308	0.742436	0.988135
ACC	DLC1_mut	2	0	0.742436	0.988135
ACC	DLC1_mut	3	3.05263	0.742436	0.988135
ACC	DLC1_mut	4	0	0.742436	0.988135
ACC	DLC1_mut	5	0	0.742436	0.988135
ACC	DLC1_mut	6	0	0.742436	0.988135
ACC	DPYD_mut	1	0	0.326039	0.789969
ACC	DPYD_mut	2	10	0.326039	0.789969
ACC	DPYD_mut	3	0	0.326039	0.789969
ACC	DPYD_mut	4	0	0.326039	0.789969
ACC	DPYD_mut	5	0	0.326039	0.789969
ACC	DPYD_mut	6	0	0.326039	0.789969
ACC	EEF1A1_mut	1	0	0.648447	0.895244
ACC	EEF1A1_mut	2	0	0.648447	0.895244
ACC	EEF1A1_mut	3	10	0.648447	0.895244
ACC	EEF1A1_mut	4	0	0.648447	0.895244
ACC	EEF1A1_mut	5	0	0.648447	0.895244
ACC	EEF1A1_mut	6	0	0.648447	0.895244
ACC	EEF1B2_mut	1	0	0.0328762	0.735075
ACC	EEF1B2_mut	2	2.51852	0.0328762	0.735075
ACC	EEF1B2_mut	3	0	0.0328762	0.735075
ACC	EEF1B2_mut	4	4.92308	0.0328762	0.735075
ACC	EEF1B2_mut	5	0	0.0328762	0.735075
ACC	EEF1B2_mut	6	2.23333	0.0328762	0.735075
ACC	EGFR_AMP	1	0	0.262471	0.789969
ACC	EGFR_AMP	2	10	0.262471	0.789969
ACC	EGFR_AMP	3	0	0.262471	0.789969
ACC	EGFR_AMP	4	0	0.262471	0.789969
ACC	EGFR_AMP	5	0	0.262471	0.789969
ACC	EGFR_AMP	6	0	0.262471	0.789969
ACC	EP300_mut	1	0	0.473981	0.789969
ACC	EP300_mut	2	0	0.473981	0.789969
ACC	EP300_mut	3	0	0.473981	0.789969
ACC	EP300_mut	4	10	0.473981	0.789969
ACC	EP300_mut	5	0	0.473981	0.789969
ACC	EP300_mut	6	0	0.473981	0.789969
ACC	EPHA1_mut	1	0	0.647539	0.895244
ACC	EPHA1_mut	2	0	0.647539	0.895244
ACC	EPHA1_mut	3	0	0.647539	0.895244
ACC	EPHA1_mut	4	0	0.647539	0.895244
ACC	EPHA1_mut	5	10	0.647539	0.895244
ACC	EPHA1_mut	6	0	0.647539	0.895244
ACC	ERCC1_mut	1	0	0.326039	0.789969
ACC	ERCC1_mut	2	10	0.326039	0.789969
ACC	ERCC1_mut	3	0	0.326039	0.789969
ACC	ERCC1_mut	4	0	0.326039	0.789969
ACC	ERCC1_mut	5	0	0.326039	0.789969
ACC	ERCC1_mut	6	0	0.326039	0.789969
ACC	ERCC5_mut	1	0	0.403086	0.789969
ACC	ERCC5_mut	2	0	0.403086	0.789969
ACC	ERCC5_mut	3	0	0.403086	0.789969
ACC	ERCC5_mut	4	10	0.403086	0.789969
ACC	ERCC5_mut	5	0	0.403086	0.789969
ACC	ERCC5_mut	6	0	0.403086	0.789969
ACC	ESR1_AMP	1	0	0.398173	0.789969
ACC	ESR1_AMP	2	0	0.398173	0.789969
ACC	ESR1_AMP	3	3.375	0.398173	0.789969
ACC	ESR1_AMP	4	0	0.398173	0.789969
ACC	ESR1_AMP	5	4.38462	0.398173	0.789969
ACC	ESR1_AMP	6	0	0.398173	0.789969
ACC	EXT1_mut	1	0	0.206333	0.789969
ACC	EXT1_mut	2	10	0.206333	0.789969
ACC	EXT1_mut	3	0	0.206333	0.789969
ACC	EXT1_mut	4	0	0.206333	0.789969
ACC	EXT1_mut	5	0	0.206333	0.789969
ACC	EXT1_mut	6	0	0.206333	0.789969
ACC	FAT1_mut	1	0	0.371521	0.789969
ACC	FAT1_mut	2	7.55556	0.371521	0.789969
ACC	FAT1_mut	3	0	0.371521	0.789969
ACC	FAT1_mut	4	4.92308	0.371521	0.789969
ACC	FAT1_mut	5	0	0.371521	0.789969
ACC	FAT1_mut	6	0	0.371521	0.789969
ACC	FGFR2_mut	1	0	0.422045	0.789969
ACC	FGFR2_mut	2	0	0.422045	0.789969
ACC	FGFR2_mut	3	0	0.422045	0.789969
ACC	FGFR2_mut	4	0	0.422045	0.789969
ACC	FGFR2_mut	5	10	0.422045	0.789969
ACC	FGFR2_mut	6	0	0.422045	0.789969
ACC	FLT4_mut	1	0	0.453409	0.789969
ACC	FLT4_mut	2	0	0.453409	0.789969
ACC	FLT4_mut	3	3.05263	0.453409	0.789969
ACC	FLT4_mut	4	4.92308	0.453409	0.789969
ACC	FLT4_mut	5	0	0.453409	0.789969
ACC	FLT4_mut	6	0	0.453409	0.789969
ACC	FXR1_mut	1	0	0.269766	0.789969
ACC	FXR1_mut	2	7.55556	0.269766	0.789969
ACC	FXR1_mut	3	3.05263	0.269766	0.789969
ACC	FXR1_mut	4	0	0.269766	0.789969
ACC	FXR1_mut	5	0	0.269766	0.789969
ACC	FXR1_mut	6	0	0.269766	0.789969
ACC	GATA3_mut	1	0	0.432735	0.789969
ACC	GATA3_mut	2	10	0.432735	0.789969
ACC	GATA3_mut	3	0	0.432735	0.789969
ACC	GATA3_mut	4	0	0.432735	0.789969
ACC	GATA3_mut	5	0	0.432735	0.789969
ACC	GATA3_mut	6	0	0.432735	0.789969
ACC	GNAS_mut	1	0	0.442921	0.789969
ACC	GNAS_mut	2	0	0.442921	0.789969
ACC	GNAS_mut	3	3.05263	0.442921	0.789969
ACC	GNAS_mut	4	4.92308	0.442921	0.789969
ACC	GNAS_mut	5	0	0.442921	0.789969
ACC	GNAS_mut	6	0	0.442921	0.789969
ACC	HCFC1_mut	1	0	0.326039	0.789969
ACC	HCFC1_mut	2	10	0.326039	0.789969
ACC	HCFC1_mut	3	0	0.326039	0.789969
ACC	HCFC1_mut	4	0	0.326039	0.789969
ACC	HCFC1_mut	5	0	0.326039	0.789969
ACC	HCFC1_mut	6	0	0.326039	0.789969
ACC	HDAC9_mut	1	10	0.977309	0.993419
ACC	HDAC9_mut	2	0	0.977309	0.993419
ACC	HDAC9_mut	3	0	0.977309	0.993419
ACC	HDAC9_mut	4	0	0.977309	0.993419
ACC	HDAC9_mut	5	0	0.977309	0.993419
ACC	HDAC9_mut	6	0	0.977309	0.993419
ACC	HERC2_mut	1	0	0.118395	0.789969
ACC	HERC2_mut	2	0	0.118395	0.789969
ACC	HERC2_mut	3	0	0.118395	0.789969
ACC	HERC2_mut	4	0	0.118395	0.789969
ACC	HERC2_mut	5	0	0.118395	0.789969
ACC	HERC2_mut	6	10	0.118395	0.789969
ACC	HIST1H3B_mut	1	0	0.628479	0.895244
ACC	HIST1H3B_mut	2	0	0.628479	0.895244
ACC	HIST1H3B_mut	3	10	0.628479	0.895244
ACC	HIST1H3B_mut	4	0	0.628479	0.895244
ACC	HIST1H3B_mut	5	0	0.628479	0.895244
ACC	HIST1H3B_mut	6	0	0.628479	0.895244
ACC	HIST1H3F_mut	1	0	0.118395	0.789969
ACC	HIST1H3F_mut	2	0	0.118395	0.789969
ACC	HIST1H3F_mut	3	0	0.118395	0.789969
ACC	HIST1H3F_mut	4	0	0.118395	0.789969
ACC	HIST1H3F_mut	5	0	0.118395	0.789969
ACC	HIST1H3F_mut	6	10	0.118395	0.789969
ACC	HSP90AA1_mut	1	0	0.432735	0.789969
ACC	HSP90AA1_mut	2	10	0.432735	0.789969
ACC	HSP90AA1_mut	3	0	0.432735	0.789969
ACC	HSP90AA1_mut	4	0	0.432735	0.789969
ACC	HSP90AA1_mut	5	0	0.432735	0.789969
ACC	HSP90AA1_mut	6	0	0.432735	0.789969
ACC	HSP90AB1_mut	1	0	0.271077	0.789969
ACC	HSP90AB1_mut	2	0	0.271077	0.789969
ACC	HSP90AB1_mut	3	0	0.271077	0.789969
ACC	HSP90AB1_mut	4	0	0.271077	0.789969
ACC	HSP90AB1_mut	5	10	0.271077	0.789969
ACC	HSP90AB1_mut	6	0	0.271077	0.789969
ACC	ICAM1_AMP	1	10	0.644786	0.895244
ACC	ICAM1_AMP	2	0	0.644786	0.895244
ACC	ICAM1_AMP	3	0	0.644786	0.895244
ACC	ICAM1_AMP	4	0	0.644786	0.895244
ACC	ICAM1_AMP	5	0	0.644786	0.895244
ACC	ICAM1_AMP	6	0	0.644786	0.895244
ACC	IREB2_mut	1	0	0.432735	0.789969
ACC	IREB2_mut	2	10	0.432735	0.789969
ACC	IREB2_mut	3	0	0.432735	0.789969
ACC	IREB2_mut	4	0	0.432735	0.789969
ACC	IREB2_mut	5	0	0.432735	0.789969
ACC	IREB2_mut	6	0	0.432735	0.789969
ACC	IRF2_mut	1	0	0.531464	0.805909
ACC	IRF2_mut	2	0	0.531464	0.805909
ACC	IRF2_mut	3	10	0.531464	0.805909
ACC	IRF2_mut	4	0	0.531464	0.805909
ACC	IRF2_mut	5	0	0.531464	0.805909
ACC	IRF2_mut	6	0	0.531464	0.805909
ACC	JAK1_DEL	1	10	0.985245	0.996013
ACC	JAK1_DEL	2	0	0.985245	0.996013
ACC	JAK1_DEL	3	0	0.985245	0.996013
ACC	JAK1_DEL	4	0	0.985245	0.996013
ACC	JAK1_DEL	5	0	0.985245	0.996013
ACC	JAK1_DEL	6	0	0.985245	0.996013
ACC	JAK2_mut	1	0	0.372126	0.789969
ACC	JAK2_mut	2	0	0.372126	0.789969
ACC	JAK2_mut	3	0	0.372126	0.789969
ACC	JAK2_mut	4	10	0.372126	0.789969
ACC	JAK2_mut	5	0	0.372126	0.789969
ACC	JAK2_mut	6	0	0.372126	0.789969
ACC	JAK3_mut	1	0	0.473981	0.789969
ACC	JAK3_mut	2	0	0.473981	0.789969
ACC	JAK3_mut	3	0	0.473981	0.789969
ACC	JAK3_mut	4	10	0.473981	0.789969
ACC	JAK3_mut	5	0	0.473981	0.789969
ACC	JAK3_mut	6	0	0.473981	0.789969
ACC	JUN_AMP	1	0	0.271003	0.789969
ACC	JUN_AMP	2	0	0.271003	0.789969
ACC	JUN_AMP	3	0	0.271003	0.789969
ACC	JUN_AMP	4	0	0.271003	0.789969
ACC	JUN_AMP	5	0	0.271003	0.789969
ACC	JUN_AMP	6	10	0.271003	0.789969
ACC	KALRN_mut	1	0	0.473981	0.789969
ACC	KALRN_mut	2	0	0.473981	0.789969
ACC	KALRN_mut	3	0	0.473981	0.789969
ACC	KALRN_mut	4	10	0.473981	0.789969
ACC	KALRN_mut	5	0	0.473981	0.789969
ACC	KALRN_mut	6	0	0.473981	0.789969
ACC	LAMA2_mut	1	4.92308	0.603267	0.878775
ACC	LAMA2_mut	2	0	0.603267	0.878775
ACC	LAMA2_mut	3	0	0.603267	0.878775
ACC	LAMA2_mut	4	4.92308	0.603267	0.878775
ACC	LAMA2_mut	5	0	0.603267	0.878775
ACC	LAMA2_mut	6	0	0.603267	0.878775
ACC	LDHA_mut	1	0	0.021783	0.735075
ACC	LDHA_mut	2	0	0.021783	0.735075
ACC	LDHA_mut	3	0	0.021783	0.735075
ACC	LDHA_mut	4	10	0.021783	0.735075
ACC	LDHA_mut	5	0	0.021783	0.735075
ACC	LDHA_mut	6	0	0.021783	0.735075
ACC	LRP1B_mut	1	10	0.901372	0.993419
ACC	LRP1B_mut	2	0	0.901372	0.993419
ACC	LRP1B_mut	3	0	0.901372	0.993419
ACC	LRP1B_mut	4	0	0.901372	0.993419
ACC	LRP1B_mut	5	0	0.901372	0.993419
ACC	LRP1B_mut	6	0	0.901372	0.993419
ACC	MACF1_mut	1	10	0.977309	0.993419
ACC	MACF1_mut	2	0	0.977309	0.993419
ACC	MACF1_mut	3	0	0.977309	0.993419
ACC	MACF1_mut	4	0	0.977309	0.993419
ACC	MACF1_mut	5	0	0.977309	0.993419
ACC	MACF1_mut	6	0	0.977309	0.993419
ACC	MAP3K1_mut	1	0	0.469847	0.789969
ACC	MAP3K1_mut	2	0	0.469847	0.789969
ACC	MAP3K1_mut	3	0	0.469847	0.789969
ACC	MAP3K1_mut	4	10	0.469847	0.789969
ACC	MAP3K1_mut	5	0	0.469847	0.789969
ACC	MAP3K1_mut	6	0	0.469847	0.789969
ACC	MCC_mut	1	0	0.326039	0.789969
ACC	MCC_mut	2	10	0.326039	0.789969
ACC	MCC_mut	3	0	0.326039	0.789969
ACC	MCC_mut	4	0	0.326039	0.789969
ACC	MCC_mut	5	0	0.326039	0.789969
ACC	MCC_mut	6	0	0.326039	0.789969
ACC	MDM2_AMP	1	2.92308	0.555054	0.834837
ACC	MDM2_AMP	2	1.9375	0.555054	0.834837
ACC	MDM2_AMP	3	0.84375	0.555054	0.834837
ACC	MDM2_AMP	4	0	0.555054	0.834837
ACC	MDM2_AMP	5	0	0.555054	0.834837
ACC	MDM2_AMP	6	1.9375	0.555054	0.834837
ACC	MED12_mut	1	0	0.432735	0.789969
ACC	MED12_mut	2	10	0.432735	0.789969
ACC	MED12_mut	3	0	0.432735	0.789969
ACC	MED12_mut	4	0	0.432735	0.789969
ACC	MED12_mut	5	0	0.432735	0.789969
ACC	MED12_mut	6	0	0.432735	0.789969
ACC	MED23_mut	1	0	0.371521	0.789969
ACC	MED23_mut	2	7.55556	0.371521	0.789969
ACC	MED23_mut	3	0	0.371521	0.789969
ACC	MED23_mut	4	4.92308	0.371521	0.789969
ACC	MED23_mut	5	0	0.371521	0.789969
ACC	MED23_mut	6	0	0.371521	0.789969
ACC	MEF2C_mut	1	10	0.939794	0.993419
ACC	MEF2C_mut	2	0	0.939794	0.993419
ACC	MEF2C_mut	3	0	0.939794	0.993419
ACC	MEF2C_mut	4	0	0.939794	0.993419
ACC	MEF2C_mut	5	0	0.939794	0.993419
ACC	MEF2C_mut	6	0	0.939794	0.993419
ACC	MEN1_DEL	1	0	0.487002	0.797304
ACC	MEN1_DEL	2	0	0.487002	0.797304
ACC	MEN1_DEL	3	0	0.487002	0.797304
ACC	MEN1_DEL	4	0	0.487002	0.797304
ACC	MEN1_DEL	5	10	0.487002	0.797304
ACC	MEN1_DEL	6	0	0.487002	0.797304
ACC	MEN1_mut	1	3.69231	0.0736184	0.789969
ACC	MEN1_mut	2	1.25926	0.0736184	0.789969
ACC	MEN1_mut	3	1.22105	0.0736184	0.789969
ACC	MEN1_mut	4	0.820513	0.0736184	0.789969
ACC	MEN1_mut	5	0	0.0736184	0.789969
ACC	MEN1_mut	6	0	0.0736184	0.789969
ACC	MGA_mut	1	4.92308	0.698568	0.950258
ACC	MGA_mut	2	0	0.698568	0.950258
ACC	MGA_mut	3	3.05263	0.698568	0.950258
ACC	MGA_mut	4	0	0.698568	0.950258
ACC	MGA_mut	5	0	0.698568	0.950258
ACC	MGA_mut	6	0	0.698568	0.950258
ACC	MLH1_mut	1	4.92308	0.717426	0.968787
ACC	MLH1_mut	2	7.55556	0.717426	0.968787
ACC	MLH1_mut	3	0	0.717426	0.968787
ACC	MLH1_mut	4	0	0.717426	0.968787
ACC	MLH1_mut	5	0	0.717426	0.968787
ACC	MLH1_mut	6	0	0.717426	0.968787
ACC	MLL2_mut	1	0	0.469847	0.789969
ACC	MLL2_mut	2	0	0.469847	0.789969
ACC	MLL2_mut	3	0	0.469847	0.789969
ACC	MLL2_mut	4	10	0.469847	0.789969
ACC	MLL2_mut	5	0	0.469847	0.789969
ACC	MLL2_mut	6	0	0.469847	0.789969
ACC	MLL3_mut	1	0	0.0187576	0.735075
ACC	MLL3_mut	2	10	0.0187576	0.735075
ACC	MLL3_mut	3	0	0.0187576	0.735075
ACC	MLL3_mut	4	0	0.0187576	0.735075
ACC	MLL3_mut	5	0	0.0187576	0.735075
ACC	MLL3_mut	6	0	0.0187576	0.735075
ACC	MLL_mut	1	10	0.947257	0.993419
ACC	MLL_mut	2	0	0.947257	0.993419
ACC	MLL_mut	3	0	0.947257	0.993419
ACC	MLL_mut	4	0	0.947257	0.993419
ACC	MLL_mut	5	0	0.947257	0.993419
ACC	MLL_mut	6	0	0.947257	0.993419
ACC	MSH2_mut	1	0	0.0760387	0.789969
ACC	MSH2_mut	2	0	0.0760387	0.789969
ACC	MSH2_mut	3	0	0.0760387	0.789969
ACC	MSH2_mut	4	4.92308	0.0760387	0.789969
ACC	MSH2_mut	5	0	0.0760387	0.789969
ACC	MSH2_mut	6	6.7	0.0760387	0.789969
ACC	MSH6_mut	1	0	0.531464	0.805909
ACC	MSH6_mut	2	0	0.531464	0.805909
ACC	MSH6_mut	3	10	0.531464	0.805909
ACC	MSH6_mut	4	0	0.531464	0.805909
ACC	MSH6_mut	5	0	0.531464	0.805909
ACC	MSH6_mut	6	0	0.531464	0.805909
ACC	MUC4_mut	1	10	0.977309	0.993419
ACC	MUC4_mut	2	0	0.977309	0.993419
ACC	MUC4_mut	3	0	0.977309	0.993419
ACC	MUC4_mut	4	0	0.977309	0.993419
ACC	MUC4_mut	5	0	0.977309	0.993419
ACC	MUC4_mut	6	0	0.977309	0.993419
ACC	MYCN_AMP	1	0	0.4865	0.797304
ACC	MYCN_AMP	2	0	0.4865	0.797304
ACC	MYCN_AMP	3	0	0.4865	0.797304
ACC	MYCN_AMP	4	10	0.4865	0.797304
ACC	MYCN_AMP	5	0	0.4865	0.797304
ACC	MYCN_AMP	6	0	0.4865	0.797304
ACC	MYC_AMP	1	0	0.271003	0.789969
ACC	MYC_AMP	2	0	0.271003	0.789969
ACC	MYC_AMP	3	0	0.271003	0.789969
ACC	MYC_AMP	4	0	0.271003	0.789969
ACC	MYC_AMP	5	0	0.271003	0.789969
ACC	MYC_AMP	6	10	0.271003	0.789969
ACC	MYH11_mut	1	10	0.877975	0.993419
ACC	MYH11_mut	2	0	0.877975	0.993419
ACC	MYH11_mut	3	0	0.877975	0.993419
ACC	MYH11_mut	4	0	0.877975	0.993419
ACC	MYH11_mut	5	0	0.877975	0.993419
ACC	MYH11_mut	6	0	0.877975	0.993419
ACC	NAP1L1_mut	1	0	0.0318677	0.735075
ACC	NAP1L1_mut	2	0	0.0318677	0.735075
ACC	NAP1L1_mut	3	0	0.0318677	0.735075
ACC	NAP1L1_mut	4	0	0.0318677	0.735075
ACC	NAP1L1_mut	5	10	0.0318677	0.735075
ACC	NAP1L1_mut	6	0	0.0318677	0.735075
ACC	NEDD4L_mut	1	0	0.434954	0.789969
ACC	NEDD4L_mut	2	0	0.434954	0.789969
ACC	NEDD4L_mut	3	3.05263	0.434954	0.789969
ACC	NEDD4L_mut	4	4.92308	0.434954	0.789969
ACC	NEDD4L_mut	5	0	0.434954	0.789969
ACC	NEDD4L_mut	6	0	0.434954	0.789969
ACC	NF1_DEL	1	0	0.267289	0.789969
ACC	NF1_DEL	2	7.75	0.267289	0.789969
ACC	NF1_DEL	3	3.375	0.267289	0.789969
ACC	NF1_DEL	4	0	0.267289	0.789969
ACC	NF1_DEL	5	0	0.267289	0.789969
ACC	NF1_DEL	6	0	0.267289	0.789969
ACC	NF1_mut	1	1.64103	0.0393304	0.735075
ACC	NF1_mut	2	0	0.0393304	0.735075
ACC	NF1_mut	3	3.05263	0.0393304	0.735075
ACC	NF1_mut	4	0	0.0393304	0.735075
ACC	NF1_mut	5	0	0.0393304	0.735075
ACC	NF1_mut	6	2.23333	0.0393304	0.735075
ACC	NF2_DEL	1	0	0.807488	0.993419
ACC	NF2_DEL	2	0	0.807488	0.993419
ACC	NF2_DEL	3	10	0.807488	0.993419
ACC	NF2_DEL	4	0	0.807488	0.993419
ACC	NF2_DEL	5	0	0.807488	0.993419
ACC	NF2_DEL	6	0	0.807488	0.993419
ACC	NOTCH1_mut	1	10	0.879891	0.993419
ACC	NOTCH1_mut	2	0	0.879891	0.993419
ACC	NOTCH1_mut	3	0	0.879891	0.993419
ACC	NOTCH1_mut	4	0	0.879891	0.993419
ACC	NOTCH1_mut	5	0	0.879891	0.993419
ACC	NOTCH1_mut	6	0	0.879891	0.993419
ACC	NR4A2_mut	1	0	0.469847	0.789969
ACC	NR4A2_mut	2	0	0.469847	0.789969
ACC	NR4A2_mut	3	0	0.469847	0.789969
ACC	NR4A2_mut	4	10	0.469847	0.789969
ACC	NR4A2_mut	5	0	0.469847	0.789969
ACC	NR4A2_mut	6	0	0.469847	0.789969
ACC	NTRK2_mut	1	0	0.372126	0.789969
ACC	NTRK2_mut	2	0	0.372126	0.789969
ACC	NTRK2_mut	3	0	0.372126	0.789969
ACC	NTRK2_mut	4	10	0.372126	0.789969
ACC	NTRK2_mut	5	0	0.372126	0.789969
ACC	NTRK2_mut	6	0	0.372126	0.789969
ACC	PABPC1_mut	1	0	0.280153	0.789969
ACC	PABPC1_mut	2	7.55556	0.280153	0.789969
ACC	PABPC1_mut	3	3.05263	0.280153	0.789969
ACC	PABPC1_mut	4	0	0.280153	0.789969
ACC	PABPC1_mut	5	0	0.280153	0.789969
ACC	PABPC1_mut	6	0	0.280153	0.789969
ACC	PBRM1_mut	1	0	0.432735	0.789969
ACC	PBRM1_mut	2	10	0.432735	0.789969
ACC	PBRM1_mut	3	0	0.432735	0.789969
ACC	PBRM1_mut	4	0	0.432735	0.789969
ACC	PBRM1_mut	5	0	0.432735	0.789969
ACC	PBRM1_mut	6	0	0.432735	0.789969
ACC	PDGFRA_mut	1	10	0.977309	0.993419
ACC	PDGFRA_mut	2	0	0.977309	0.993419
ACC	PDGFRA_mut	3	0	0.977309	0.993419
ACC	PDGFRA_mut	4	0	0.977309	0.993419
ACC	PDGFRA_mut	5	0	0.977309	0.993419
ACC	PDGFRA_mut	6	0	0.977309	0.993419
ACC	PDPK1_AMP	1	0	0.276122	0.789969
ACC	PDPK1_AMP	2	7.75	0.276122	0.789969
ACC	PDPK1_AMP	3	3.375	0.276122	0.789969
ACC	PDPK1_AMP	4	0	0.276122	0.789969
ACC	PDPK1_AMP	5	0	0.276122	0.789969
ACC	PDPK1_AMP	6	0	0.276122	0.789969
ACC	PDX1_mut	1	10	0.877975	0.993419
ACC	PDX1_mut	2	0	0.877975	0.993419
ACC	PDX1_mut	3	0	0.877975	0.993419
ACC	PDX1_mut	4	0	0.877975	0.993419
ACC	PDX1_mut	5	0	0.877975	0.993419
ACC	PDX1_mut	6	0	0.877975	0.993419
ACC	PHOX2B_mut	1	0	0.199072	0.789969
ACC	PHOX2B_mut	2	0	0.199072	0.789969
ACC	PHOX2B_mut	3	0	0.199072	0.789969
ACC	PHOX2B_mut	4	0	0.199072	0.789969
ACC	PHOX2B_mut	5	0	0.199072	0.789969
ACC	PHOX2B_mut	6	10	0.199072	0.789969
ACC	PIK3CA_mut	1	0	0.199072	0.789969
ACC	PIK3CA_mut	2	0	0.199072	0.789969
ACC	PIK3CA_mut	3	0	0.199072	0.789969
ACC	PIK3CA_mut	4	0	0.199072	0.789969
ACC	PIK3CA_mut	5	0	0.199072	0.789969
ACC	PIK3CA_mut	6	10	0.199072	0.789969
ACC	PIK3CB_mut	1	0	0.432735	0.789969
ACC	PIK3CB_mut	2	10	0.432735	0.789969
ACC	PIK3CB_mut	3	0	0.432735	0.789969
ACC	PIK3CB_mut	4	0	0.432735	0.789969
ACC	PIK3CB_mut	5	0	0.432735	0.789969
ACC	PIK3CB_mut	6	0	0.432735	0.789969
ACC	PIK3R3_mut	1	10	0.977309	0.993419
ACC	PIK3R3_mut	2	0	0.977309	0.993419
ACC	PIK3R3_mut	3	0	0.977309	0.993419
ACC	PIK3R3_mut	4	0	0.977309	0.993419
ACC	PIK3R3_mut	5	0	0.977309	0.993419
ACC	PIK3R3_mut	6	0	0.977309	0.993419
ACC	PLCB1_mut	1	0	0.531464	0.805909
ACC	PLCB1_mut	2	0	0.531464	0.805909
ACC	PLCB1_mut	3	10	0.531464	0.805909
ACC	PLCB1_mut	4	0	0.531464	0.805909
ACC	PLCB1_mut	5	0	0.531464	0.805909
ACC	PLCB1_mut	6	0	0.531464	0.805909
ACC	PLCG1_mut	1	0	0.021783	0.735075
ACC	PLCG1_mut	2	0	0.021783	0.735075
ACC	PLCG1_mut	3	0	0.021783	0.735075
ACC	PLCG1_mut	4	10	0.021783	0.735075
ACC	PLCG1_mut	5	0	0.021783	0.735075
ACC	PLCG1_mut	6	0	0.021783	0.735075
ACC	PLXNA1_mut	1	0	0.473981	0.789969
ACC	PLXNA1_mut	2	0	0.473981	0.789969
ACC	PLXNA1_mut	3	0	0.473981	0.789969
ACC	PLXNA1_mut	4	10	0.473981	0.789969
ACC	PLXNA1_mut	5	0	0.473981	0.789969
ACC	PLXNA1_mut	6	0	0.473981	0.789969
ACC	PMS2_mut	1	0	0.118395	0.789969
ACC	PMS2_mut	2	0	0.118395	0.789969
ACC	PMS2_mut	3	0	0.118395	0.789969
ACC	PMS2_mut	4	0	0.118395	0.789969
ACC	PMS2_mut	5	0	0.118395	0.789969
ACC	PMS2_mut	6	10	0.118395	0.789969
ACC	POLE_mut	1	0	0.415389	0.789969
ACC	POLE_mut	2	0	0.415389	0.789969
ACC	POLE_mut	3	3.05263	0.415389	0.789969
ACC	POLE_mut	4	4.92308	0.415389	0.789969
ACC	POLE_mut	5	0	0.415389	0.789969
ACC	POLE_mut	6	0	0.415389	0.789969
ACC	POT1_mut	1	0	0.0730133	0.789969
ACC	POT1_mut	2	7.55556	0.0730133	0.789969
ACC	POT1_mut	3	0	0.0730133	0.789969
ACC	POT1_mut	4	0	0.0730133	0.789969
ACC	POT1_mut	5	0	0.0730133	0.789969
ACC	POT1_mut	6	6.7	0.0730133	0.789969
ACC	PRKDC_mut	1	4.92308	0.757059	0.993305
ACC	PRKDC_mut	2	7.55556	0.757059	0.993305
ACC	PRKDC_mut	3	0	0.757059	0.993305
ACC	PRKDC_mut	4	0	0.757059	0.993305
ACC	PRKDC_mut	5	0	0.757059	0.993305
ACC	PRKDC_mut	6	0	0.757059	0.993305
ACC	PRPF8_mut	1	0	0.531464	0.805909
ACC	PRPF8_mut	2	0	0.531464	0.805909
ACC	PRPF8_mut	3	10	0.531464	0.805909
ACC	PRPF8_mut	4	0	0.531464	0.805909
ACC	PRPF8_mut	5	0	0.531464	0.805909
ACC	PRPF8_mut	6	0	0.531464	0.805909
ACC	PTCH1_mut	1	4.92308	0.748386	0.988939
ACC	PTCH1_mut	2	0	0.748386	0.988939
ACC	PTCH1_mut	3	0	0.748386	0.988939
ACC	PTCH1_mut	4	4.92308	0.748386	0.988939
ACC	PTCH1_mut	5	0	0.748386	0.988939
ACC	PTCH1_mut	6	0	0.748386	0.988939
ACC	PTK2_AMP	1	0	0.162501	0.789969
ACC	PTK2_AMP	2	0	0.162501	0.789969
ACC	PTK2_AMP	3	0	0.162501	0.789969
ACC	PTK2_AMP	4	4.83333	0.162501	0.789969
ACC	PTK2_AMP	5	0	0.162501	0.789969
ACC	PTK2_AMP	6	7.75	0.162501	0.789969
ACC	RAD50_mut	1	0	0.62505	0.895244
ACC	RAD50_mut	2	0	0.62505	0.895244
ACC	RAD50_mut	3	10	0.62505	0.895244
ACC	RAD50_mut	4	0	0.62505	0.895244
ACC	RAD50_mut	5	0	0.62505	0.895244
ACC	RAD50_mut	6	0	0.62505	0.895244
ACC	RAD51L3-RFFL_mut	1	0	0.473981	0.789969
ACC	RAD51L3-RFFL_mut	2	0	0.473981	0.789969
ACC	RAD51L3-RFFL_mut	3	0	0.473981	0.789969
ACC	RAD51L3-RFFL_mut	4	10	0.473981	0.789969
ACC	RAD51L3-RFFL_mut	5	0	0.473981	0.789969
ACC	RAD51L3-RFFL_mut	6	0	0.473981	0.789969
ACC	RAPGEF1_mut	1	0	0.432735	0.789969
ACC	RAPGEF1_mut	2	10	0.432735	0.789969
ACC	RAPGEF1_mut	3	0	0.432735	0.789969
ACC	RAPGEF1_mut	4	0	0.432735	0.789969
ACC	RAPGEF1_mut	5	0	0.432735	0.789969
ACC	RAPGEF1_mut	6	0	0.432735	0.789969
ACC	RASGRP1_mut	1	0	0.432735	0.789969
ACC	RASGRP1_mut	2	10	0.432735	0.789969
ACC	RASGRP1_mut	3	0	0.432735	0.789969
ACC	RASGRP1_mut	4	0	0.432735	0.789969
ACC	RASGRP1_mut	5	0	0.432735	0.789969
ACC	RASGRP1_mut	6	0	0.432735	0.789969
ACC	RB1_DEL	1	0	0.105892	0.789969
ACC	RB1_DEL	2	2.58333	0.105892	0.789969
ACC	RB1_DEL	3	3.375	0.105892	0.789969
ACC	RB1_DEL	4	0	0.105892	0.789969
ACC	RB1_DEL	5	0	0.105892	0.789969
ACC	RB1_DEL	6	2.58333	0.105892	0.789969
ACC	RB1_mut	1	0	0.184046	0.789969
ACC	RB1_mut	2	7.55556	0.184046	0.789969
ACC	RB1_mut	3	3.05263	0.184046	0.789969
ACC	RB1_mut	4	0	0.184046	0.789969
ACC	RB1_mut	5	0	0.184046	0.789969
ACC	RB1_mut	6	0	0.184046	0.789969
ACC	RBM10_mut	1	0	0.531464	0.805909
ACC	RBM10_mut	2	0	0.531464	0.805909
ACC	RBM10_mut	3	10	0.531464	0.805909
ACC	RBM10_mut	4	0	0.531464	0.805909
ACC	RBM10_mut	5	0	0.531464	0.805909
ACC	RBM10_mut	6	0	0.531464	0.805909
ACC	RICTOR_AMP	1	4.38462	0.810499	0.993419
ACC	RICTOR_AMP	2	0	0.810499	0.993419
ACC	RICTOR_AMP	3	1.125	0.810499	0.993419
ACC	RICTOR_AMP	4	1.61111	0.810499	0.993419
ACC	RICTOR_AMP	5	0	0.810499	0.993419
ACC	RICTOR_AMP	6	0	0.810499	0.993419
ACC	ROBO2_mut	1	0	0.473981	0.789969
ACC	ROBO2_mut	2	0	0.473981	0.789969
ACC	ROBO2_mut	3	0	0.473981	0.789969
ACC	ROBO2_mut	4	10	0.473981	0.789969
ACC	ROBO2_mut	5	0	0.473981	0.789969
ACC	ROBO2_mut	6	0	0.473981	0.789969
ACC	RUNX1_mut	1	0	0.603267	0.878775
ACC	RUNX1_mut	2	0	0.603267	0.878775
ACC	RUNX1_mut	3	10	0.603267	0.878775
ACC	RUNX1_mut	4	0	0.603267	0.878775
ACC	RUNX1_mut	5	0	0.603267	0.878775
ACC	RUNX1_mut	6	0	0.603267	0.878775
ACC	S100A1_AMP	1	4.38462	0.425976	0.789969
ACC	S100A1_AMP	2	0	0.425976	0.789969
ACC	S100A1_AMP	3	0	0.425976	0.789969
ACC	S100A1_AMP	4	0	0.425976	0.789969
ACC	S100A1_AMP	5	0	0.425976	0.789969
ACC	S100A1_AMP	6	7.75	0.425976	0.789969
ACC	SDHA_mut	1	10	0.977309	0.993419
ACC	SDHA_mut	2	0	0.977309	0.993419
ACC	SDHA_mut	3	0	0.977309	0.993419
ACC	SDHA_mut	4	0	0.977309	0.993419
ACC	SDHA_mut	5	0	0.977309	0.993419
ACC	SDHA_mut	6	0	0.977309	0.993419
ACC	SDHD_mut	1	10	0.977309	0.993419
ACC	SDHD_mut	2	0	0.977309	0.993419
ACC	SDHD_mut	3	0	0.977309	0.993419
ACC	SDHD_mut	4	0	0.977309	0.993419
ACC	SDHD_mut	5	0	0.977309	0.993419
ACC	SDHD_mut	6	0	0.977309	0.993419
ACC	SETD2_mut	1	0	0.432735	0.789969
ACC	SETD2_mut	2	10	0.432735	0.789969
ACC	SETD2_mut	3	0	0.432735	0.789969
ACC	SETD2_mut	4	0	0.432735	0.789969
ACC	SETD2_mut	5	0	0.432735	0.789969
ACC	SETD2_mut	6	0	0.432735	0.789969
ACC	SF3B1_mut	1	0	0.166095	0.789969
ACC	SF3B1_mut	2	0	0.166095	0.789969
ACC	SF3B1_mut	3	0	0.166095	0.789969
ACC	SF3B1_mut	4	0	0.166095	0.789969
ACC	SF3B1_mut	5	0	0.166095	0.789969
ACC	SF3B1_mut	6	10	0.166095	0.789969
ACC	SMAD4_DEL	1	0	0.731707	0.980912
ACC	SMAD4_DEL	2	0	0.731707	0.980912
ACC	SMAD4_DEL	3	10	0.731707	0.980912
ACC	SMAD4_DEL	4	0	0.731707	0.980912
ACC	SMAD4_DEL	5	0	0.731707	0.980912
ACC	SMAD4_DEL	6	0	0.731707	0.980912
ACC	SMARCA4_mut	1	10	0.977309	0.993419
ACC	SMARCA4_mut	2	0	0.977309	0.993419
ACC	SMARCA4_mut	3	0	0.977309	0.993419
ACC	SMARCA4_mut	4	0	0.977309	0.993419
ACC	SMARCA4_mut	5	0	0.977309	0.993419
ACC	SMARCA4_mut	6	0	0.977309	0.993419
ACC	SMARCE1_mut	1	0	0.469847	0.789969
ACC	SMARCE1_mut	2	0	0.469847	0.789969
ACC	SMARCE1_mut	3	0	0.469847	0.789969
ACC	SMARCE1_mut	4	10	0.469847	0.789969
ACC	SMARCE1_mut	5	0	0.469847	0.789969
ACC	SMARCE1_mut	6	0	0.469847	0.789969
ACC	SMC1A_mut	1	10	0.977309	0.993419
ACC	SMC1A_mut	2	0	0.977309	0.993419
ACC	SMC1A_mut	3	0	0.977309	0.993419
ACC	SMC1A_mut	4	0	0.977309	0.993419
ACC	SMC1A_mut	5	0	0.977309	0.993419
ACC	SMC1A_mut	6	0	0.977309	0.993419
ACC	SMO_mut	1	0	0.473981	0.789969
ACC	SMO_mut	2	0	0.473981	0.789969
ACC	SMO_mut	3	0	0.473981	0.789969
ACC	SMO_mut	4	10	0.473981	0.789969
ACC	SMO_mut	5	0	0.473981	0.789969
ACC	SMO_mut	6	0	0.473981	0.789969
ACC	SPTAN1_mut	1	10	0.977309	0.993419
ACC	SPTAN1_mut	2	0	0.977309	0.993419
ACC	SPTAN1_mut	3	0	0.977309	0.993419
ACC	SPTAN1_mut	4	0	0.977309	0.993419
ACC	SPTAN1_mut	5	0	0.977309	0.993419
ACC	SPTAN1_mut	6	0	0.977309	0.993419
ACC	STAG2_mut	1	10	0.977309	0.993419
ACC	STAG2_mut	2	0	0.977309	0.993419
ACC	STAG2_mut	3	0	0.977309	0.993419
ACC	STAG2_mut	4	0	0.977309	0.993419
ACC	STAG2_mut	5	0	0.977309	0.993419
ACC	STAG2_mut	6	0	0.977309	0.993419
ACC	STARD13_mut	1	0	0.206333	0.789969
ACC	STARD13_mut	2	10	0.206333	0.789969
ACC	STARD13_mut	3	0	0.206333	0.789969
ACC	STARD13_mut	4	0	0.206333	0.789969
ACC	STARD13_mut	5	0	0.206333	0.789969
ACC	STARD13_mut	6	0	0.206333	0.789969
ACC	STAT6_mut	1	10	0.977309	0.993419
ACC	STAT6_mut	2	0	0.977309	0.993419
ACC	STAT6_mut	3	0	0.977309	0.993419
ACC	STAT6_mut	4	0	0.977309	0.993419
ACC	STAT6_mut	5	0	0.977309	0.993419
ACC	STAT6_mut	6	0	0.977309	0.993419
ACC	STK11_mut	1	0	0.118395	0.789969
ACC	STK11_mut	2	0	0.118395	0.789969
ACC	STK11_mut	3	0	0.118395	0.789969
ACC	STK11_mut	4	0	0.118395	0.789969
ACC	STK11_mut	5	0	0.118395	0.789969
ACC	STK11_mut	6	10	0.118395	0.789969
ACC	STK4_mut	1	0	0.372126	0.789969
ACC	STK4_mut	2	0	0.372126	0.789969
ACC	STK4_mut	3	0	0.372126	0.789969
ACC	STK4_mut	4	10	0.372126	0.789969
ACC	STK4_mut	5	0	0.372126	0.789969
ACC	STK4_mut	6	0	0.372126	0.789969
ACC	SUFU_mut	1	0	0.469847	0.789969
ACC	SUFU_mut	2	0	0.469847	0.789969
ACC	SUFU_mut	3	0	0.469847	0.789969
ACC	SUFU_mut	4	10	0.469847	0.789969
ACC	SUFU_mut	5	0	0.469847	0.789969
ACC	SUFU_mut	6	0	0.469847	0.789969
ACC	SUZ12_DEL	1	0	0.797451	0.993419
ACC	SUZ12_DEL	2	0	0.797451	0.993419
ACC	SUZ12_DEL	3	10	0.797451	0.993419
ACC	SUZ12_DEL	4	0	0.797451	0.993419
ACC	SUZ12_DEL	5	0	0.797451	0.993419
ACC	SUZ12_DEL	6	0	0.797451	0.993419
ACC	SVEP1_mut	1	0	0.0350948	0.735075
ACC	SVEP1_mut	2	0	0.0350948	0.735075
ACC	SVEP1_mut	3	1.52632	0.0350948	0.735075
ACC	SVEP1_mut	4	9.84615	0.0350948	0.735075
ACC	SVEP1_mut	5	0	0.0350948	0.735075
ACC	SVEP1_mut	6	0	0.0350948	0.735075
ACC	SYK_AMP	1	0	0.807488	0.993419
ACC	SYK_AMP	2	0	0.807488	0.993419
ACC	SYK_AMP	3	10	0.807488	0.993419
ACC	SYK_AMP	4	0	0.807488	0.993419
ACC	SYK_AMP	5	0	0.807488	0.993419
ACC	SYK_AMP	6	0	0.807488	0.993419
ACC	TAOK2_mut	1	0	0.473981	0.789969
ACC	TAOK2_mut	2	0	0.473981	0.789969
ACC	TAOK2_mut	3	0	0.473981	0.789969
ACC	TAOK2_mut	4	10	0.473981	0.789969
ACC	TAOK2_mut	5	0	0.473981	0.789969
ACC	TAOK2_mut	6	0	0.473981	0.789969
ACC	TAP1_mut	1	10	0.977309	0.993419
ACC	TAP1_mut	2	0	0.977309	0.993419
ACC	TAP1_mut	3	0	0.977309	0.993419
ACC	TAP1_mut	4	0	0.977309	0.993419
ACC	TAP1_mut	5	0	0.977309	0.993419
ACC	TAP1_mut	6	0	0.977309	0.993419
ACC	TERT_AMP	1	1.46154	0.0958547	0.789969
ACC	TERT_AMP	2	0.704545	0.0958547	0.789969
ACC	TERT_AMP	3	2.41071	0.0958547	0.789969
ACC	TERT_AMP	4	0.966667	0.0958547	0.789969
ACC	TERT_AMP	5	0.398601	0.0958547	0.789969
ACC	TERT_AMP	6	0	0.0958547	0.789969
ACC	TJP1_mut	1	0	0.432735	0.789969
ACC	TJP1_mut	2	10	0.432735	0.789969
ACC	TJP1_mut	3	0	0.432735	0.789969
ACC	TJP1_mut	4	0	0.432735	0.789969
ACC	TJP1_mut	5	0	0.432735	0.789969
ACC	TJP1_mut	6	0	0.432735	0.789969
ACC	TNPO2_mut	1	0	0.531464	0.805909
ACC	TNPO2_mut	2	0	0.531464	0.805909
ACC	TNPO2_mut	3	10	0.531464	0.805909
ACC	TNPO2_mut	4	0	0.531464	0.805909
ACC	TNPO2_mut	5	0	0.531464	0.805909
ACC	TNPO2_mut	6	0	0.531464	0.805909
ACC	TOM1_mut	1	10	0.880799	0.993419
ACC	TOM1_mut	2	0	0.880799	0.993419
ACC	TOM1_mut	3	0	0.880799	0.993419
ACC	TOM1_mut	4	0	0.880799	0.993419
ACC	TOM1_mut	5	0	0.880799	0.993419
ACC	TOM1_mut	6	0	0.880799	0.993419
ACC	TP53_DEL	1	0	0.471846	0.789969
ACC	TP53_DEL	2	0	0.471846	0.789969
ACC	TP53_DEL	3	0	0.471846	0.789969
ACC	TP53_DEL	4	10	0.471846	0.789969
ACC	TP53_DEL	5	0	0.471846	0.789969
ACC	TP53_DEL	6	0	0.471846	0.789969
ACC	TP53_mut	1	1.23077	0.0624244	0.789969
ACC	TP53_mut	2	1.16239	0.0624244	0.789969
ACC	TP53_mut	3	1.52632	0.0624244	0.789969
ACC	TP53_mut	4	1.23077	0.0624244	0.789969
ACC	TP53_mut	5	0	0.0624244	0.789969
ACC	TP53_mut	6	1.03077	0.0624244	0.789969
ACC	UBR5_mut	1	0	0.304558	0.789969
ACC	UBR5_mut	2	7.55556	0.304558	0.789969
ACC	UBR5_mut	3	0	0.304558	0.789969
ACC	UBR5_mut	4	4.92308	0.304558	0.789969
ACC	UBR5_mut	5	0	0.304558	0.789969
ACC	UBR5_mut	6	0	0.304558	0.789969
ACC	WHSC1L1_mut	1	0	0.473981	0.789969
ACC	WHSC1L1_mut	2	0	0.473981	0.789969
ACC	WHSC1L1_mut	3	0	0.473981	0.789969
ACC	WHSC1L1_mut	4	10	0.473981	0.789969
ACC	WHSC1L1_mut	5	0	0.473981	0.789969
ACC	WHSC1L1_mut	6	0	0.473981	0.789969
ACC	WIPF1_mut	1	0	0.432735	0.789969
ACC	WIPF1_mut	2	10	0.432735	0.789969
ACC	WIPF1_mut	3	0	0.432735	0.789969
ACC	WIPF1_mut	4	0	0.432735	0.789969
ACC	WIPF1_mut	5	0	0.432735	0.789969
ACC	WIPF1_mut	6	0	0.432735	0.789969
ACC	WT1_mut	1	0	0.592073	0.876269
ACC	WT1_mut	2	0	0.592073	0.876269
ACC	WT1_mut	3	10	0.592073	0.876269
ACC	WT1_mut	4	0	0.592073	0.876269
ACC	WT1_mut	5	0	0.592073	0.876269
ACC	WT1_mut	6	0	0.592073	0.876269
ACC	WWOX_mut	1	10	0.880799	0.993419
ACC	WWOX_mut	2	0	0.880799	0.993419
ACC	WWOX_mut	3	0	0.880799	0.993419
ACC	WWOX_mut	4	0	0.880799	0.993419
ACC	WWOX_mut	5	0	0.880799	0.993419
ACC	WWOX_mut	6	0	0.880799	0.993419
ACC	XPC_mut	1	10	0.932432	0.993419
ACC	XPC_mut	2	0	0.932432	0.993419
ACC	XPC_mut	3	0	0.932432	0.993419
ACC	XPC_mut	4	0	0.932432	0.993419
ACC	XPC_mut	5	0	0.932432	0.993419
ACC	XPC_mut	6	0	0.932432	0.993419
ACC	ZFHX3_mut	1	4.92308	0.126765	0.789969
ACC	ZFHX3_mut	2	0	0.126765	0.789969
ACC	ZFHX3_mut	3	0	0.126765	0.789969
ACC	ZFHX3_mut	4	0	0.126765	0.789969
ACC	ZFHX3_mut	5	0	0.126765	0.789969
ACC	ZFHX3_mut	6	6.7	0.126765	0.789969
ACC	ZNF638_mut	1	0	0.647539	0.895244
ACC	ZNF638_mut	2	0	0.647539	0.895244
ACC	ZNF638_mut	3	0	0.647539	0.895244
ACC	ZNF638_mut	4	0	0.647539	0.895244
ACC	ZNF638_mut	5	10	0.647539	0.895244
ACC	ZNF638_mut	6	0	0.647539	0.895244
ACC	ZNRF3_mut	1	1.64103	0.795079	0.993419
ACC	ZNRF3_mut	2	2.51852	0.795079	0.993419
ACC	ZNRF3_mut	3	1.01754	0.795079	0.993419
ACC	ZNRF3_mut	4	1.64103	0.795079	0.993419
ACC	ZNRF3_mut	5	0	0.795079	0.993419
ACC	ZNRF3_mut	6	0	0.795079	0.993419
BLCA	ABCB1_mut	1	1.17917	0.680285	0.967145
BLCA	ABCB1_mut	2	0	0.680285	0.967145
BLCA	ABCB1_mut	3	1.33602	0.680285	0.967145
BLCA	ABCB1_mut	4	1.23649	0.680285	0.967145
BLCA	ABCB1_mut	5	1.60187	0.680285	0.967145
BLCA	ABCB1_mut	6	0.520833	0.680285	0.967145
BLCA	ABCB4_mut	1	1.57222	0.503963	0.958167
BLCA	ABCB4_mut	2	0	0.503963	0.958167
BLCA	ABCB4_mut	3	0	0.503963	0.958167
BLCA	ABCB4_mut	4	0	0.503963	0.958167
BLCA	ABCB4_mut	5	3.7377	0.503963	0.958167
BLCA	ABCB4_mut	6	1.04167	0.503963	0.958167
BLCA	ABL1_mut	1	0.589583	0.758232	0.967145
BLCA	ABL1_mut	2	0	0.758232	0.967145
BLCA	ABL1_mut	3	1.16901	0.758232	0.967145
BLCA	ABL1_mut	4	0	0.758232	0.967145
BLCA	ABL1_mut	5	1.40164	0.758232	0.967145
BLCA	ABL1_mut	6	2.77778	0.758232	0.967145
BLCA	ABL2_mut	1	1.17917	0.509553	0.958167
BLCA	ABL2_mut	2	5.09722	0.509553	0.958167
BLCA	ABL2_mut	3	0	0.509553	0.958167
BLCA	ABL2_mut	4	0	0.509553	0.958167
BLCA	ABL2_mut	5	2.80328	0.509553	0.958167
BLCA	ABL2_mut	6	0	0.509553	0.958167
BLCA	ACACA_mut	1	0.7075	0.463211	0.940838
BLCA	ACACA_mut	2	1.85354	0.463211	0.940838
BLCA	ACACA_mut	3	1.40282	0.463211	0.940838
BLCA	ACACA_mut	4	1.79853	0.463211	0.940838
BLCA	ACACA_mut	5	0.467213	0.463211	0.940838
BLCA	ACACA_mut	6	0.757576	0.463211	0.940838
BLCA	ACAD8_mut	1	0	0.477642	0.940838
BLCA	ACAD8_mut	2	0	0.477642	0.940838
BLCA	ACAD8_mut	3	0	0.477642	0.940838
BLCA	ACAD8_mut	4	10	0.477642	0.940838
BLCA	ACAD8_mut	5	0	0.477642	0.940838
BLCA	ACAD8_mut	6	0	0.477642	0.940838
BLCA	ACO1_mut	1	0	0.298374	0.940838
BLCA	ACO1_mut	2	0	0.298374	0.940838
BLCA	ACO1_mut	3	0	0.298374	0.940838
BLCA	ACO1_mut	4	0	0.298374	0.940838
BLCA	ACO1_mut	5	0	0.298374	0.940838
BLCA	ACO1_mut	6	10	0.298374	0.940838
BLCA	ACSL3_mut	1	0	0.694207	0.967145
BLCA	ACSL3_mut	2	0	0.694207	0.967145
BLCA	ACSL3_mut	3	10	0.694207	0.967145
BLCA	ACSL3_mut	4	0	0.694207	0.967145
BLCA	ACSL3_mut	5	0	0.694207	0.967145
BLCA	ACSL3_mut	6	0	0.694207	0.967145
BLCA	ACSL6_mut	1	0	0.676829	0.967145
BLCA	ACSL6_mut	2	0	0.676829	0.967145
BLCA	ACSL6_mut	3	0	0.676829	0.967145
BLCA	ACSL6_mut	4	0	0.676829	0.967145
BLCA	ACSL6_mut	5	10	0.676829	0.967145
BLCA	ACSL6_mut	6	0	0.676829	0.967145
BLCA	ACTB_mut	1	0.262037	0.258841	0.940838
BLCA	ACTB_mut	2	1.13272	0.258841	0.940838
BLCA	ACTB_mut	3	3.11737	0.258841	0.940838
BLCA	ACTB_mut	4	1.0991	0.258841	0.940838
BLCA	ACTB_mut	5	0.622951	0.258841	0.940838
BLCA	ACTB_mut	6	1.04167	0.258841	0.940838
BLCA	ACTG1_mut	1	3.14444	0.124187	0.940838
BLCA	ACTG1_mut	2	0	0.124187	0.940838
BLCA	ACTG1_mut	3	1.87042	0.124187	0.940838
BLCA	ACTG1_mut	4	1.64865	0.124187	0.940838
BLCA	ACTG1_mut	5	0	0.124187	0.940838
BLCA	ACTG1_mut	6	0	0.124187	0.940838
BLCA	ACTG2_mut	1	0	0.775813	0.967145
BLCA	ACTG2_mut	2	0	0.775813	0.967145
BLCA	ACTG2_mut	3	0	0.775813	0.967145
BLCA	ACTG2_mut	4	0	0.775813	0.967145
BLCA	ACTG2_mut	5	10	0.775813	0.967145
BLCA	ACTG2_mut	6	0	0.775813	0.967145
BLCA	ACVR1B_mut	1	0	0.490041	0.944256
BLCA	ACVR1B_mut	2	10	0.490041	0.944256
BLCA	ACVR1B_mut	3	0	0.490041	0.944256
BLCA	ACVR1B_mut	4	0	0.490041	0.944256
BLCA	ACVR1B_mut	5	0	0.490041	0.944256
BLCA	ACVR1B_mut	6	0	0.490041	0.944256
BLCA	ACVR1_mut	1	0	0.33811	0.940838
BLCA	ACVR1_mut	2	5.09722	0.33811	0.940838
BLCA	ACVR1_mut	3	0	0.33811	0.940838
BLCA	ACVR1_mut	4	4.94595	0.33811	0.940838
BLCA	ACVR1_mut	5	0	0.33811	0.940838
BLCA	ACVR1_mut	6	2.08333	0.33811	0.940838
BLCA	ADAM10_mut	1	0	0.412907	0.940838
BLCA	ADAM10_mut	2	2.54861	0.412907	0.940838
BLCA	ADAM10_mut	3	1.16901	0.412907	0.940838
BLCA	ADAM10_mut	4	0	0.412907	0.940838
BLCA	ADAM10_mut	5	3.7377	0.412907	0.940838
BLCA	ADAM10_mut	6	1.04167	0.412907	0.940838
BLCA	ADARB2_DEL	1	1.16949	0.909675	0.980533
BLCA	ADARB2_DEL	2	0	0.909675	0.980533
BLCA	ADARB2_DEL	3	2.4403	0.909675	0.980533
BLCA	ADARB2_DEL	4	0	0.909675	0.980533
BLCA	ADARB2_DEL	5	0	0.909675	0.980533
BLCA	ADARB2_DEL	6	2.02564	0.909675	0.980533
BLCA	AFF4_mut	1	3.14444	0.0652439	0.92069
BLCA	AFF4_mut	2	0	0.0652439	0.92069
BLCA	AFF4_mut	3	0.779343	0.0652439	0.92069
BLCA	AFF4_mut	4	3.95676	0.0652439	0.92069
BLCA	AFF4_mut	5	0	0.0652439	0.92069
BLCA	AFF4_mut	6	0	0.0652439	0.92069
BLCA	AHCTF1_mut	1	0.336905	0.272256	0.940838
BLCA	AHCTF1_mut	2	0	0.272256	0.940838
BLCA	AHCTF1_mut	3	0.668008	0.272256	0.940838
BLCA	AHCTF1_mut	4	0	0.272256	0.940838
BLCA	AHCTF1_mut	5	3.36393	0.272256	0.940838
BLCA	AHCTF1_mut	6	2.5	0.272256	0.940838
BLCA	AHR_mut	1	0	0.00894309	0.55
BLCA	AHR_mut	2	0	0.00894309	0.55
BLCA	AHR_mut	3	0	0.00894309	0.55
BLCA	AHR_mut	4	4.94595	0.00894309	0.55
BLCA	AHR_mut	5	0	0.00894309	0.55
BLCA	AHR_mut	6	8.33333	0.00894309	0.55
BLCA	AKT1_mut	1	1.17917	0.910061	0.980533
BLCA	AKT1_mut	2	0	0.910061	0.980533
BLCA	AKT1_mut	3	2.33803	0.910061	0.980533
BLCA	AKT1_mut	4	0	0.910061	0.980533
BLCA	AKT1_mut	5	0	0.910061	0.980533
BLCA	AKT1_mut	6	2.08333	0.910061	0.980533
BLCA	AKT2_AMP	1	0.584746	0.759033	0.967145
BLCA	AKT2_AMP	2	1.57802	0.759033	0.967145
BLCA	AKT2_AMP	3	1.77476	0.759033	0.967145
BLCA	AKT2_AMP	4	0.689189	0.759033	0.967145
BLCA	AKT2_AMP	5	0.873533	0.759033	0.967145
BLCA	AKT2_AMP	6	1.01282	0.759033	0.967145
BLCA	AKT2_mut	1	1.17917	0.909756	0.980533
BLCA	AKT2_mut	2	0	0.909756	0.980533
BLCA	AKT2_mut	3	2.33803	0.909756	0.980533
BLCA	AKT2_mut	4	0	0.909756	0.980533
BLCA	AKT2_mut	5	0	0.909756	0.980533
BLCA	AKT2_mut	6	2.08333	0.909756	0.980533
BLCA	ALK_mut	1	0.884375	0.351728	0.940838
BLCA	ALK_mut	2	0	0.351728	0.940838
BLCA	ALK_mut	3	0.467606	0.351728	0.940838
BLCA	ALK_mut	4	2.1982	0.351728	0.940838
BLCA	ALK_mut	5	0.560656	0.351728	0.940838
BLCA	ALK_mut	6	2.38095	0.351728	0.940838
BLCA	ALOX12B_AMP	1	10	0.993477	0.995142
BLCA	ALOX12B_AMP	2	0	0.993477	0.995142
BLCA	ALOX12B_AMP	3	0	0.993477	0.995142
BLCA	ALOX12B_AMP	4	0	0.993477	0.995142
BLCA	ALOX12B_AMP	5	0	0.993477	0.995142
BLCA	ALOX12B_AMP	6	0	0.993477	0.995142
BLCA	ALOX12B_mut	1	10	0.814329	0.980533
BLCA	ALOX12B_mut	2	0	0.814329	0.980533
BLCA	ALOX12B_mut	3	0	0.814329	0.980533
BLCA	ALOX12B_mut	4	0	0.814329	0.980533
BLCA	ALOX12B_mut	5	0	0.814329	0.980533
BLCA	ALOX12B_mut	6	0	0.814329	0.980533
BLCA	ALOX15B_mut	1	2.35833	0.856098	0.980533
BLCA	ALOX15B_mut	2	0	0.856098	0.980533
BLCA	ALOX15B_mut	3	0	0.856098	0.980533
BLCA	ALOX15B_mut	4	0	0.856098	0.980533
BLCA	ALOX15B_mut	5	5.60656	0.856098	0.980533
BLCA	ALOX15B_mut	6	0	0.856098	0.980533
BLCA	ANK3_mut	1	1.50076	0.915346	0.980533
BLCA	ANK3_mut	2	0.599673	0.915346	0.980533
BLCA	ANK3_mut	3	0.935211	0.915346	0.980533
BLCA	ANK3_mut	4	0.581876	0.915346	0.980533
BLCA	ANK3_mut	5	0.70082	0.915346	0.980533
BLCA	ANK3_mut	6	1.19048	0.915346	0.980533
BLCA	APAF1_mut	1	0	0.522358	0.958354
BLCA	APAF1_mut	2	5.09722	0.522358	0.958354
BLCA	APAF1_mut	3	0	0.522358	0.958354
BLCA	APAF1_mut	4	0	0.522358	0.958354
BLCA	APAF1_mut	5	2.80328	0.522358	0.958354
BLCA	APAF1_mut	6	2.08333	0.522358	0.958354
BLCA	APC_DEL	1	2.33898	0.341931	0.940838
BLCA	APC_DEL	2	2.05143	0.341931	0.940838
BLCA	APC_DEL	3	2.4403	0.341931	0.940838
BLCA	APC_DEL	4	0	0.341931	0.940838
BLCA	APC_DEL	5	0	0.341931	0.940838
BLCA	APC_DEL	6	0	0.341931	0.940838
BLCA	APC_mut	1	0.544231	0.280793	0.940838
BLCA	APC_mut	2	1.45635	0.280793	0.940838
BLCA	APC_mut	3	1.55869	0.280793	0.940838
BLCA	APC_mut	4	0	0.280793	0.940838
BLCA	APC_mut	5	0.800937	0.280793	0.940838
BLCA	APC_mut	6	1.89394	0.280793	0.940838
BLCA	AQR_mut	1	3.14444	0.627337	0.967145
BLCA	AQR_mut	2	0	0.627337	0.967145
BLCA	AQR_mut	3	0.779343	0.627337	0.967145
BLCA	AQR_mut	4	0	0.627337	0.967145
BLCA	AQR_mut	5	0.934426	0.627337	0.967145
BLCA	AQR_mut	6	0.694444	0.627337	0.967145
BLCA	ARAF_mut	1	0	0.700711	0.967145
BLCA	ARAF_mut	2	0	0.700711	0.967145
BLCA	ARAF_mut	3	10	0.700711	0.967145
BLCA	ARAF_mut	4	0	0.700711	0.967145
BLCA	ARAF_mut	5	0	0.700711	0.967145
BLCA	ARAF_mut	6	0	0.700711	0.967145
BLCA	ARAP3_mut	1	0.943333	0.944106	0.980533
BLCA	ARAP3_mut	2	1.69907	0.944106	0.980533
BLCA	ARAP3_mut	3	0.779343	0.944106	0.980533
BLCA	ARAP3_mut	4	0	0.944106	0.980533
BLCA	ARAP3_mut	5	0.934426	0.944106	0.980533
BLCA	ARAP3_mut	6	1.66667	0.944106	0.980533
BLCA	ARFGAP1_mut	1	0	0.702033	0.967145
BLCA	ARFGAP1_mut	2	0	0.702033	0.967145
BLCA	ARFGAP1_mut	3	10	0.702033	0.967145
BLCA	ARFGAP1_mut	4	0	0.702033	0.967145
BLCA	ARFGAP1_mut	5	0	0.702033	0.967145
BLCA	ARFGAP1_mut	6	0	0.702033	0.967145
BLCA	ARFGAP3_mut	1	0	0.472459	0.940838
BLCA	ARFGAP3_mut	2	0	0.472459	0.940838
BLCA	ARFGAP3_mut	3	0	0.472459	0.940838
BLCA	ARFGAP3_mut	4	9.89189	0.472459	0.940838
BLCA	ARFGAP3_mut	5	0	0.472459	0.940838
BLCA	ARFGAP3_mut	6	4.16667	0.472459	0.940838
BLCA	ARFGEF1_mut	1	1.17917	0.128963	0.940838
BLCA	ARFGEF1_mut	2	0	0.128963	0.940838
BLCA	ARFGEF1_mut	3	0.425096	0.128963	0.940838
BLCA	ARFGEF1_mut	4	0	0.128963	0.940838
BLCA	ARFGEF1_mut	5	0.509687	0.128963	0.940838
BLCA	ARFGEF1_mut	6	4.16667	0.128963	0.940838
BLCA	ARFGEF2_mut	1	0.336905	0.0585366	0.919908
BLCA	ARFGEF2_mut	2	1.45635	0.0585366	0.919908
BLCA	ARFGEF2_mut	3	0.668008	0.0585366	0.919908
BLCA	ARFGEF2_mut	4	0	0.0585366	0.919908
BLCA	ARFGEF2_mut	5	0	0.0585366	0.919908
BLCA	ARFGEF2_mut	6	6.94444	0.0585366	0.919908
BLCA	ARG1_AMP	1	9.35593	0.326074	0.940838
BLCA	ARG1_AMP	2	0	0.326074	0.940838
BLCA	ARG1_AMP	3	0	0.326074	0.940838
BLCA	ARG1_AMP	4	0	0.326074	0.940838
BLCA	ARG1_AMP	5	1.41949	0.326074	0.940838
BLCA	ARG1_AMP	6	0	0.326074	0.940838
BLCA	ARG2_AMP	1	0	0.800582	0.980533
BLCA	ARG2_AMP	2	0	0.800582	0.980533
BLCA	ARG2_AMP	3	10	0.800582	0.980533
BLCA	ARG2_AMP	4	0	0.800582	0.980533
BLCA	ARG2_AMP	5	0	0.800582	0.980533
BLCA	ARG2_AMP	6	0	0.800582	0.980533
BLCA	ARHGAP26_mut	1	0	0.509146	0.958167
BLCA	ARHGAP26_mut	2	10	0.509146	0.958167
BLCA	ARHGAP26_mut	3	0	0.509146	0.958167
BLCA	ARHGAP26_mut	4	0	0.509146	0.958167
BLCA	ARHGAP26_mut	5	0	0.509146	0.958167
BLCA	ARHGAP26_mut	6	0	0.509146	0.958167
BLCA	ARHGAP29_mut	1	0.943333	0.27124	0.940838
BLCA	ARHGAP29_mut	2	0	0.27124	0.940838
BLCA	ARHGAP29_mut	3	0.779343	0.27124	0.940838
BLCA	ARHGAP29_mut	4	3.95676	0.27124	0.940838
BLCA	ARHGAP29_mut	5	0	0.27124	0.940838
BLCA	ARHGAP29_mut	6	1.66667	0.27124	0.940838
BLCA	ARHGAP35_mut	1	3.03214	0.00254065	0.234375
BLCA	ARHGAP35_mut	2	2.35256	0.00254065	0.234375
BLCA	ARHGAP35_mut	3	0.311737	0.00254065	0.234375
BLCA	ARHGAP35_mut	4	0	0.00254065	0.234375
BLCA	ARHGAP35_mut	5	1.29382	0.00254065	0.234375
BLCA	ARHGAP35_mut	6	0	0.00254065	0.234375
BLCA	ARHGEF2_mut	1	1.17917	0.864736	0.980533
BLCA	ARHGEF2_mut	2	0	0.864736	0.980533
BLCA	ARHGEF2_mut	3	0	0.864736	0.980533
BLCA	ARHGEF2_mut	4	0	0.864736	0.980533
BLCA	ARHGEF2_mut	5	2.80328	0.864736	0.980533
BLCA	ARHGEF2_mut	6	2.08333	0.864736	0.980533
BLCA	ARHGEF6_mut	1	0	0.670732	0.967145
BLCA	ARHGEF6_mut	2	0	0.670732	0.967145
BLCA	ARHGEF6_mut	3	0	0.670732	0.967145
BLCA	ARHGEF6_mut	4	0	0.670732	0.967145
BLCA	ARHGEF6_mut	5	10	0.670732	0.967145
BLCA	ARHGEF6_mut	6	0	0.670732	0.967145
BLCA	ARID1A_mut	1	1.13549	0.216463	0.940838
BLCA	ARID1A_mut	2	0.53655	0.216463	0.940838
BLCA	ARID1A_mut	3	1.07909	0.216463	0.940838
BLCA	ARID1A_mut	4	0.520626	0.216463	0.940838
BLCA	ARID1A_mut	5	1.29382	0.216463	0.940838
BLCA	ARID1A_mut	6	1.04167	0.216463	0.940838
BLCA	ARID1B_mut	1	0.416176	0.332724	0.940838
BLCA	ARID1B_mut	2	1.13272	0.332724	0.940838
BLCA	ARID1B_mut	3	0.825186	0.332724	0.940838
BLCA	ARID1B_mut	4	1.0991	0.332724	0.940838
BLCA	ARID1B_mut	5	2.40281	0.332724	0.940838
BLCA	ARID1B_mut	6	1.04167	0.332724	0.940838
BLCA	ARID2_mut	1	0.524074	0.339126	0.940838
BLCA	ARID2_mut	2	0.48545	0.339126	0.940838
BLCA	ARID2_mut	3	0.738325	0.339126	0.940838
BLCA	ARID2_mut	4	1.56188	0.339126	0.940838
BLCA	ARID2_mut	5	2.10246	0.339126	0.940838
BLCA	ARID2_mut	6	1.22549	0.339126	0.940838
BLCA	ARID4A_mut	1	2.35833	0.710061	0.967145
BLCA	ARID4A_mut	2	0	0.710061	0.967145
BLCA	ARID4A_mut	3	1.55869	0.710061	0.967145
BLCA	ARID4A_mut	4	0	0.710061	0.967145
BLCA	ARID4A_mut	5	0	0.710061	0.967145
BLCA	ARID4A_mut	6	1.38889	0.710061	0.967145
BLCA	ARID4B_mut	1	0.589583	0.363923	0.940838
BLCA	ARID4B_mut	2	0	0.363923	0.940838
BLCA	ARID4B_mut	3	0	0.363923	0.940838
BLCA	ARID4B_mut	4	0	0.363923	0.940838
BLCA	ARID4B_mut	5	3.7377	0.363923	0.940838
BLCA	ARID4B_mut	6	2.77778	0.363923	0.940838
BLCA	ARID5B_mut	1	0	0.653049	0.967145
BLCA	ARID5B_mut	2	0	0.653049	0.967145
BLCA	ARID5B_mut	3	1.55869	0.653049	0.967145
BLCA	ARID5B_mut	4	0	0.653049	0.967145
BLCA	ARID5B_mut	5	1.86885	0.653049	0.967145
BLCA	ARID5B_mut	6	4.16667	0.653049	0.967145
BLCA	ARNTL_mut	1	1.17917	0.462297	0.940838
BLCA	ARNTL_mut	2	0	0.462297	0.940838
BLCA	ARNTL_mut	3	0	0.462297	0.940838
BLCA	ARNTL_mut	4	0	0.462297	0.940838
BLCA	ARNTL_mut	5	0	0.462297	0.940838
BLCA	ARNTL_mut	6	8.33333	0.462297	0.940838
BLCA	AR_AMP	1	0	0.743778	0.967145
BLCA	AR_AMP	2	0	0.743778	0.967145
BLCA	AR_AMP	3	0	0.743778	0.967145
BLCA	AR_AMP	4	0	0.743778	0.967145
BLCA	AR_AMP	5	10	0.743778	0.967145
BLCA	AR_AMP	6	0	0.743778	0.967145
BLCA	AR_mut	1	0	0.148679	0.940838
BLCA	AR_mut	2	0	0.148679	0.940838
BLCA	AR_mut	3	10	0.148679	0.940838
BLCA	AR_mut	4	0	0.148679	0.940838
BLCA	AR_mut	5	0	0.148679	0.940838
BLCA	AR_mut	6	0	0.148679	0.940838
BLCA	ASH1L_mut	1	1.17917	0.926728	0.980533
BLCA	ASH1L_mut	2	0.599673	0.926728	0.980533
BLCA	ASH1L_mut	3	0.935211	0.926728	0.980533
BLCA	ASH1L_mut	4	1.23649	0.926728	0.980533
BLCA	ASH1L_mut	5	0.70082	0.926728	0.980533
BLCA	ASH1L_mut	6	1.19048	0.926728	0.980533
BLCA	ASPM_mut	1	0.589583	0.108537	0.940838
BLCA	ASPM_mut	2	2.54861	0.108537	0.940838
BLCA	ASPM_mut	3	0	0.108537	0.940838
BLCA	ASPM_mut	4	6.59459	0.108537	0.940838
BLCA	ASPM_mut	5	1.40164	0.108537	0.940838
BLCA	ASPM_mut	6	0	0.108537	0.940838
BLCA	ASXL1_mut	1	0.589583	0.105183	0.940838
BLCA	ASXL1_mut	2	1.56838	0.105183	0.940838
BLCA	ASXL1_mut	3	1.70038	0.105183	0.940838
BLCA	ASXL1_mut	4	1.52183	0.105183	0.940838
BLCA	ASXL1_mut	5	0	0.105183	0.940838
BLCA	ASXL1_mut	6	1.51515	0.105183	0.940838
BLCA	ATF2_mut	1	0	0.367276	0.940838
BLCA	ATF2_mut	2	0	0.367276	0.940838
BLCA	ATF2_mut	3	0	0.367276	0.940838
BLCA	ATF2_mut	4	9.89189	0.367276	0.940838
BLCA	ATF2_mut	5	5.60656	0.367276	0.940838
BLCA	ATF2_mut	6	0	0.367276	0.940838
BLCA	ATIC_mut	1	0	0.860569	0.980533
BLCA	ATIC_mut	2	0	0.860569	0.980533
BLCA	ATIC_mut	3	0	0.860569	0.980533
BLCA	ATIC_mut	4	0	0.860569	0.980533
BLCA	ATIC_mut	5	0	0.860569	0.980533
BLCA	ATIC_mut	6	10	0.860569	0.980533
BLCA	ATM_DEL	1	0.779661	0.759835	0.967145
BLCA	ATM_DEL	2	0	0.759835	0.967145
BLCA	ATM_DEL	3	0	0.759835	0.967145
BLCA	ATM_DEL	4	3.21622	0.759835	0.967145
BLCA	ATM_DEL	5	1.89266	0.759835	0.967145
BLCA	ATM_DEL	6	1.35043	0.759835	0.967145
BLCA	ATM_mut	1	0.758036	0.86372	0.980533
BLCA	ATM_mut	2	1.23569	0.86372	0.980533
BLCA	ATM_mut	3	1.09108	0.86372	0.980533
BLCA	ATM_mut	4	1.19902	0.86372	0.980533
BLCA	ATM_mut	5	1.08514	0.86372	0.980533
BLCA	ATM_mut	6	0.972222	0.86372	0.980533
BLCA	ATP1A1_mut	1	2.35833	0.0577236	0.919908
BLCA	ATP1A1_mut	2	0	0.0577236	0.919908
BLCA	ATP1A1_mut	3	0	0.0577236	0.919908
BLCA	ATP1A1_mut	4	4.94595	0.0577236	0.919908
BLCA	ATP1A1_mut	5	1.12131	0.0577236	0.919908
BLCA	ATP1A1_mut	6	0	0.0577236	0.919908
BLCA	ATP6AP2_mut	1	0	0.457215	0.940838
BLCA	ATP6AP2_mut	2	0	0.457215	0.940838
BLCA	ATP6AP2_mut	3	0	0.457215	0.940838
BLCA	ATP6AP2_mut	4	9.89189	0.457215	0.940838
BLCA	ATP6AP2_mut	5	0	0.457215	0.940838
BLCA	ATP6AP2_mut	6	4.16667	0.457215	0.940838
BLCA	ATRX_mut	1	0.471667	0.222663	0.940838
BLCA	ATRX_mut	2	0	0.222663	0.940838
BLCA	ATRX_mut	3	0	0.222663	0.940838
BLCA	ATRX_mut	4	4.94595	0.222663	0.940838
BLCA	ATRX_mut	5	1.12131	0.222663	0.940838
BLCA	ATRX_mut	6	2.08333	0.222663	0.940838
BLCA	ATR_mut	1	1.34762	0.757215	0.967145
BLCA	ATR_mut	2	1.01944	0.757215	0.967145
BLCA	ATR_mut	3	0.467606	0.757215	0.967145
BLCA	ATR_mut	4	0.471042	0.757215	0.967145
BLCA	ATR_mut	5	0.885246	0.757215	0.967145
BLCA	ATR_mut	6	1.5625	0.757215	0.967145
BLCA	AURKA_AMP	1	0.779661	0.423224	0.940838
BLCA	AURKA_AMP	2	0	0.423224	0.940838
BLCA	AURKA_AMP	3	1.62687	0.423224	0.940838
BLCA	AURKA_AMP	4	0	0.423224	0.940838
BLCA	AURKA_AMP	5	5.67797	0.423224	0.940838
BLCA	AURKA_AMP	6	0	0.423224	0.940838
BLCA	AXIN1_DEL	1	0.584746	0.430951	0.940838
BLCA	AXIN1_DEL	2	2.56429	0.430951	0.940838
BLCA	AXIN1_DEL	3	0	0.430951	0.940838
BLCA	AXIN1_DEL	4	0	0.430951	0.940838
BLCA	AXIN1_DEL	5	3.78531	0.430951	0.940838
BLCA	AXIN1_DEL	6	1.01282	0.430951	0.940838
BLCA	AXIN1_mut	1	2.35833	0.300102	0.940838
BLCA	AXIN1_mut	2	0	0.300102	0.940838
BLCA	AXIN1_mut	3	4.67606	0.300102	0.940838
BLCA	AXIN1_mut	4	0	0.300102	0.940838
BLCA	AXIN1_mut	5	0	0.300102	0.940838
BLCA	AXIN1_mut	6	0	0.300102	0.940838
BLCA	AXIN2_mut	1	0.786111	0.874492	0.980533
BLCA	AXIN2_mut	2	1.45635	0.874492	0.980533
BLCA	AXIN2_mut	3	0.668008	0.874492	0.980533
BLCA	AXIN2_mut	4	0	0.874492	0.980533
BLCA	AXIN2_mut	5	1.86885	0.874492	0.980533
BLCA	AXIN2_mut	6	1.38889	0.874492	0.980533
BLCA	B2M_DEL	1	0	0.0923324	0.92943
BLCA	B2M_DEL	2	10	0.0923324	0.92943
BLCA	B2M_DEL	3	0	0.0923324	0.92943
BLCA	B2M_DEL	4	0	0.0923324	0.92943
BLCA	B2M_DEL	5	0	0.0923324	0.92943
BLCA	B2M_DEL	6	0	0.0923324	0.92943
BLCA	BAP1_mut	1	0.471667	0.169715	0.940838
BLCA	BAP1_mut	2	2.03889	0.169715	0.940838
BLCA	BAP1_mut	3	0.935211	0.169715	0.940838
BLCA	BAP1_mut	4	3.2973	0.169715	0.940838
BLCA	BAP1_mut	5	1.12131	0.169715	0.940838
BLCA	BAP1_mut	6	0.378788	0.169715	0.940838
BLCA	BARD1_mut	1	0	0.16128	0.940838
BLCA	BARD1_mut	2	0	0.16128	0.940838
BLCA	BARD1_mut	3	0	0.16128	0.940838
BLCA	BARD1_mut	4	0	0.16128	0.940838
BLCA	BARD1_mut	5	5.60656	0.16128	0.940838
BLCA	BARD1_mut	6	4.16667	0.16128	0.940838
BLCA	BAX_mut	1	0	0.683232	0.967145
BLCA	BAX_mut	2	0	0.683232	0.967145
BLCA	BAX_mut	3	0	0.683232	0.967145
BLCA	BAX_mut	4	0	0.683232	0.967145
BLCA	BAX_mut	5	10	0.683232	0.967145
BLCA	BAX_mut	6	0	0.683232	0.967145
BLCA	BAZ2B_mut	1	0.786111	0.111992	0.940838
BLCA	BAZ2B_mut	2	0	0.111992	0.940838
BLCA	BAZ2B_mut	3	1.55869	0.111992	0.940838
BLCA	BAZ2B_mut	4	2.28274	0.111992	0.940838
BLCA	BAZ2B_mut	5	0.37377	0.111992	0.940838
BLCA	BAZ2B_mut	6	1.38889	0.111992	0.940838
BLCA	BCL10_mut	1	0	0.677033	0.967145
BLCA	BCL10_mut	2	0	0.677033	0.967145
BLCA	BCL10_mut	3	0	0.677033	0.967145
BLCA	BCL10_mut	4	0	0.677033	0.967145
BLCA	BCL10_mut	5	10	0.677033	0.967145
BLCA	BCL10_mut	6	0	0.677033	0.967145
BLCA	BCL11A_mut	1	0	0.288516	0.940838
BLCA	BCL11A_mut	2	0	0.288516	0.940838
BLCA	BCL11A_mut	3	0	0.288516	0.940838
BLCA	BCL11A_mut	4	0	0.288516	0.940838
BLCA	BCL11A_mut	5	2.80328	0.288516	0.940838
BLCA	BCL11A_mut	6	8.33333	0.288516	0.940838
BLCA	BCLAF1_mut	1	1.57222	0.256402	0.940838
BLCA	BCLAF1_mut	2	0	0.256402	0.940838
BLCA	BCLAF1_mut	3	0	0.256402	0.940838
BLCA	BCLAF1_mut	4	0	0.256402	0.940838
BLCA	BCLAF1_mut	5	0	0.256402	0.940838
BLCA	BCLAF1_mut	6	6.25	0.256402	0.940838
BLCA	BCOR_mut	1	0.471667	0.476931	0.940838
BLCA	BCOR_mut	2	0	0.476931	0.940838
BLCA	BCOR_mut	3	0.935211	0.476931	0.940838
BLCA	BCOR_mut	4	0	0.476931	0.940838
BLCA	BCOR_mut	5	1.12131	0.476931	0.940838
BLCA	BCOR_mut	6	4.16667	0.476931	0.940838
BLCA	BIRC3_DEL	1	2.33898	0.886792	0.980533
BLCA	BIRC3_DEL	2	0	0.886792	0.980533
BLCA	BIRC3_DEL	3	0	0.886792	0.980533
BLCA	BIRC3_DEL	4	0	0.886792	0.980533
BLCA	BIRC3_DEL	5	0	0.886792	0.980533
BLCA	BIRC3_DEL	6	4.05128	0.886792	0.980533
BLCA	BLM_mut	1	1.01071	0.134146	0.940838
BLCA	BLM_mut	2	2.54861	0.134146	0.940838
BLCA	BLM_mut	3	0	0.134146	0.940838
BLCA	BLM_mut	4	1.0991	0.134146	0.940838
BLCA	BLM_mut	5	2.40281	0.134146	0.940838
BLCA	BLM_mut	6	0.462963	0.134146	0.940838
BLCA	BMPR1A_mut	1	1.17917	0.939329	0.980533
BLCA	BMPR1A_mut	2	0	0.939329	0.980533
BLCA	BMPR1A_mut	3	0	0.939329	0.980533
BLCA	BMPR1A_mut	4	0	0.939329	0.980533
BLCA	BMPR1A_mut	5	2.80328	0.939329	0.980533
BLCA	BMPR1A_mut	6	2.08333	0.939329	0.980533
BLCA	BMPR2_mut	1	2.35833	0.360467	0.940838
BLCA	BMPR2_mut	2	0	0.360467	0.940838
BLCA	BMPR2_mut	3	0.668008	0.360467	0.940838
BLCA	BMPR2_mut	4	1.41313	0.360467	0.940838
BLCA	BMPR2_mut	5	0	0.360467	0.940838
BLCA	BMPR2_mut	6	1.38889	0.360467	0.940838
BLCA	BPTF_mut	1	1.17917	0.946748	0.980533
BLCA	BPTF_mut	2	0	0.946748	0.980533
BLCA	BPTF_mut	3	0.935211	0.946748	0.980533
BLCA	BPTF_mut	4	1.97838	0.946748	0.980533
BLCA	BPTF_mut	5	1.12131	0.946748	0.980533
BLCA	BPTF_mut	6	0.833333	0.946748	0.980533
BLCA	BRAF_mut	1	0	0.0470528	0.919908
BLCA	BRAF_mut	2	6.11667	0.0470528	0.919908
BLCA	BRAF_mut	3	1.55869	0.0470528	0.919908
BLCA	BRAF_mut	4	0	0.0470528	0.919908
BLCA	BRAF_mut	5	0.800937	0.0470528	0.919908
BLCA	BRAF_mut	6	1.38889	0.0470528	0.919908
BLCA	BRCA1_mut	1	1.34762	0.0987805	0.92943
BLCA	BRCA1_mut	2	0	0.0987805	0.92943
BLCA	BRCA1_mut	3	1.03912	0.0987805	0.92943
BLCA	BRCA1_mut	4	3.70946	0.0987805	0.92943
BLCA	BRCA1_mut	5	0.560656	0.0987805	0.92943
BLCA	BRCA1_mut	6	0.416667	0.0987805	0.92943
BLCA	BRCA2_DEL	1	1.94915	0.384384	0.940838
BLCA	BRCA2_DEL	2	2.27937	0.384384	0.940838
BLCA	BRCA2_DEL	3	0.48806	0.384384	0.940838
BLCA	BRCA2_DEL	4	0	0.384384	0.940838
BLCA	BRCA2_DEL	5	1.26177	0.384384	0.940838
BLCA	BRCA2_DEL	6	0.405128	0.384384	0.940838
BLCA	BRCA2_mut	1	1.07197	0.947561	0.980533
BLCA	BRCA2_mut	2	0.67963	0.947561	0.980533
BLCA	BRCA2_mut	3	0.668008	0.947561	0.980533
BLCA	BRCA2_mut	4	1.41313	0.947561	0.980533
BLCA	BRCA2_mut	5	1.29382	0.947561	0.980533
BLCA	BRCA2_mut	6	0.961538	0.947561	0.980533
BLCA	BRD2_mut	1	1.17917	0.589533	0.967145
BLCA	BRD2_mut	2	2.03889	0.589533	0.967145
BLCA	BRD2_mut	3	0.935211	0.589533	0.967145
BLCA	BRD2_mut	4	0	0.589533	0.967145
BLCA	BRD2_mut	5	0	0.589533	0.967145
BLCA	BRD2_mut	6	2.08333	0.589533	0.967145
BLCA	BRD7_mut	1	0.786111	0.196341	0.940838
BLCA	BRD7_mut	2	1.45635	0.196341	0.940838
BLCA	BRD7_mut	3	0	0.196341	0.940838
BLCA	BRD7_mut	4	0	0.196341	0.940838
BLCA	BRD7_mut	5	0.800937	0.196341	0.940838
BLCA	BRD7_mut	6	4.16667	0.196341	0.940838
BLCA	BRIP1_mut	1	2.35833	0.514634	0.958167
BLCA	BRIP1_mut	2	0	0.514634	0.958167
BLCA	BRIP1_mut	3	0.935211	0.514634	0.958167
BLCA	BRIP1_mut	4	0	0.514634	0.958167
BLCA	BRIP1_mut	5	0	0.514634	0.958167
BLCA	BRIP1_mut	6	2.08333	0.514634	0.958167
BLCA	BRWD1_mut	1	0.786111	0.0284553	0.919908
BLCA	BRWD1_mut	2	0.926768	0.0284553	0.919908
BLCA	BRWD1_mut	3	3.34004	0.0284553	0.919908
BLCA	BRWD1_mut	4	0.899263	0.0284553	0.919908
BLCA	BRWD1_mut	5	1.12131	0.0284553	0.919908
BLCA	BRWD1_mut	6	0	0.0284553	0.919908
BLCA	BTK_mut	1	2.35833	0.834451	0.980533
BLCA	BTK_mut	2	0	0.834451	0.980533
BLCA	BTK_mut	3	0	0.834451	0.980533
BLCA	BTK_mut	4	0	0.834451	0.980533
BLCA	BTK_mut	5	5.60656	0.834451	0.980533
BLCA	BTK_mut	6	0	0.834451	0.980533
BLCA	BUB1B_mut	1	1.57222	0.667073	0.967145
BLCA	BUB1B_mut	2	2.54861	0.667073	0.967145
BLCA	BUB1B_mut	3	1.16901	0.667073	0.967145
BLCA	BUB1B_mut	4	0	0.667073	0.967145
BLCA	BUB1B_mut	5	0	0.667073	0.967145
BLCA	BUB1B_mut	6	1.04167	0.667073	0.967145
BLCA	C15orf55_mut	1	0.786111	0.0494919	0.919908
BLCA	C15orf55_mut	2	0	0.0494919	0.919908
BLCA	C15orf55_mut	3	14.0282	0.0494919	0.919908
BLCA	C15orf55_mut	4	0	0.0494919	0.919908
BLCA	C15orf55_mut	5	0	0.0494919	0.919908
BLCA	C15orf55_mut	6	0	0.0494919	0.919908
BLCA	CAD_mut	1	0.786111	0.660467	0.967145
BLCA	CAD_mut	2	3.39815	0.660467	0.967145
BLCA	CAD_mut	3	1.55869	0.660467	0.967145
BLCA	CAD_mut	4	0	0.660467	0.967145
BLCA	CAD_mut	5	1.86885	0.660467	0.967145
BLCA	CAD_mut	6	0	0.660467	0.967145
BLCA	CALR_mut	1	0	0.760264	0.967145
BLCA	CALR_mut	2	0	0.760264	0.967145
BLCA	CALR_mut	3	0	0.760264	0.967145
BLCA	CALR_mut	4	0	0.760264	0.967145
BLCA	CALR_mut	5	5.60656	0.760264	0.967145
BLCA	CALR_mut	6	4.16667	0.760264	0.967145
BLCA	CAPN7_mut	1	2.35833	0.556606	0.967145
BLCA	CAPN7_mut	2	0	0.556606	0.967145
BLCA	CAPN7_mut	3	0	0.556606	0.967145
BLCA	CAPN7_mut	4	3.2973	0.556606	0.967145
BLCA	CAPN7_mut	5	0	0.556606	0.967145
BLCA	CAPN7_mut	6	1.38889	0.556606	0.967145
BLCA	CARD11_mut	1	0	0.784451	0.976265
BLCA	CARD11_mut	2	0	0.784451	0.976265
BLCA	CARD11_mut	3	2.33803	0.784451	0.976265
BLCA	CARD11_mut	4	0	0.784451	0.976265
BLCA	CARD11_mut	5	2.80328	0.784451	0.976265
BLCA	CARD11_mut	6	2.08333	0.784451	0.976265
BLCA	CARM1_mut	1	4.71667	0.403862	0.940838
BLCA	CARM1_mut	2	5.09722	0.403862	0.940838
BLCA	CARM1_mut	3	0	0.403862	0.940838
BLCA	CARM1_mut	4	0	0.403862	0.940838
BLCA	CARM1_mut	5	0	0.403862	0.940838
BLCA	CARM1_mut	6	0	0.403862	0.940838
BLCA	CASP1_mut	1	0.786111	0.665854	0.967145
BLCA	CASP1_mut	2	0	0.665854	0.967145
BLCA	CASP1_mut	3	1.55869	0.665854	0.967145
BLCA	CASP1_mut	4	3.2973	0.665854	0.967145
BLCA	CASP1_mut	5	0	0.665854	0.967145
BLCA	CASP1_mut	6	1.38889	0.665854	0.967145
BLCA	CASP2_mut	1	10	0.967276	0.980533
BLCA	CASP2_mut	2	0	0.967276	0.980533
BLCA	CASP2_mut	3	0	0.967276	0.980533
BLCA	CASP2_mut	4	0	0.967276	0.980533
BLCA	CASP2_mut	5	0	0.967276	0.980533
BLCA	CASP2_mut	6	0	0.967276	0.980533
BLCA	CASP8_mut	1	0.943333	0.717785	0.967145
BLCA	CASP8_mut	2	0	0.717785	0.967145
BLCA	CASP8_mut	3	0.779343	0.717785	0.967145
BLCA	CASP8_mut	4	0	0.717785	0.967145
BLCA	CASP8_mut	5	2.24262	0.717785	0.967145
BLCA	CASP8_mut	6	1.66667	0.717785	0.967145
BLCA	CASP9_mut	1	0	0.287602	0.940838
BLCA	CASP9_mut	2	3.39815	0.287602	0.940838
BLCA	CASP9_mut	3	0	0.287602	0.940838
BLCA	CASP9_mut	4	0	0.287602	0.940838
BLCA	CASP9_mut	5	1.86885	0.287602	0.940838
BLCA	CASP9_mut	6	4.16667	0.287602	0.940838
BLCA	CAT_mut	1	0	0.733841	0.967145
BLCA	CAT_mut	2	0	0.733841	0.967145
BLCA	CAT_mut	3	1.55869	0.733841	0.967145
BLCA	CAT_mut	4	3.2973	0.733841	0.967145
BLCA	CAT_mut	5	1.86885	0.733841	0.967145
BLCA	CAT_mut	6	1.38889	0.733841	0.967145
BLCA	CBFB_mut	1	10	0.953455	0.980533
BLCA	CBFB_mut	2	0	0.953455	0.980533
BLCA	CBFB_mut	3	0	0.953455	0.980533
BLCA	CBFB_mut	4	0	0.953455	0.980533
BLCA	CBFB_mut	5	0	0.953455	0.980533
BLCA	CBFB_mut	6	0	0.953455	0.980533
BLCA	CBLB_mut	1	1.57222	0.713313	0.967145
BLCA	CBLB_mut	2	2.54861	0.713313	0.967145
BLCA	CBLB_mut	3	0	0.713313	0.967145
BLCA	CBLB_mut	4	0	0.713313	0.967145
BLCA	CBLB_mut	5	1.40164	0.713313	0.967145
BLCA	CBLB_mut	6	1.04167	0.713313	0.967145
BLCA	CBLC_mut	1	10	0.960163	0.980533
BLCA	CBLC_mut	2	0	0.960163	0.980533
BLCA	CBLC_mut	3	0	0.960163	0.980533
BLCA	CBLC_mut	4	0	0.960163	0.980533
BLCA	CBLC_mut	5	0	0.960163	0.980533
BLCA	CBLC_mut	6	0	0.960163	0.980533
BLCA	CCAR1_mut	1	2.35833	0.278049	0.940838
BLCA	CCAR1_mut	2	0	0.278049	0.940838
BLCA	CCAR1_mut	3	1.55869	0.278049	0.940838
BLCA	CCAR1_mut	4	0	0.278049	0.940838
BLCA	CCAR1_mut	5	0	0.278049	0.940838
BLCA	CCAR1_mut	6	1.38889	0.278049	0.940838
BLCA	CCND1_AMP	1	0.492417	0.00190686	0.234375
BLCA	CCND1_AMP	2	1.53857	0.00190686	0.234375
BLCA	CCND1_AMP	3	1.18717	0.00190686	0.234375
BLCA	CCND1_AMP	4	2.68018	0.00190686	0.234375
BLCA	CCND1_AMP	5	0.396137	0.00190686	0.234375
BLCA	CCND1_AMP	6	1.12536	0.00190686	0.234375
BLCA	CCND1_mut	1	0	0.806911	0.980533
BLCA	CCND1_mut	2	0	0.806911	0.980533
BLCA	CCND1_mut	3	2.33803	0.806911	0.980533
BLCA	CCND1_mut	4	0	0.806911	0.980533
BLCA	CCND1_mut	5	2.80328	0.806911	0.980533
BLCA	CCND1_mut	6	2.08333	0.806911	0.980533
BLCA	CCND2_AMP	1	1.75424	0.93065	0.980533
BLCA	CCND2_AMP	2	1.70952	0.93065	0.980533
BLCA	CCND2_AMP	3	0.813433	0.93065	0.980533
BLCA	CCND2_AMP	4	0	0.93065	0.980533
BLCA	CCND2_AMP	5	0.946328	0.93065	0.980533
BLCA	CCND2_AMP	6	0.675214	0.93065	0.980533
BLCA	CCND3_AMP	1	0	0.0623244	0.919908
BLCA	CCND3_AMP	2	0	0.0623244	0.919908
BLCA	CCND3_AMP	3	1.95224	0.0623244	0.919908
BLCA	CCND3_AMP	4	0	0.0623244	0.919908
BLCA	CCND3_AMP	5	0.946328	0.0623244	0.919908
BLCA	CCND3_AMP	6	5.40171	0.0623244	0.919908
BLCA	CCNE1_AMP	1	1.35415	0.692894	0.967145
BLCA	CCNE1_AMP	2	0.732653	0.692894	0.967145
BLCA	CCNE1_AMP	3	1.22015	0.692894	0.967145
BLCA	CCNE1_AMP	4	1.48441	0.692894	0.967145
BLCA	CCNE1_AMP	5	0.405569	0.692894	0.967145
BLCA	CCNE1_AMP	6	0.810256	0.692894	0.967145
BLCA	CCT5_mut	1	0	0.485671	0.940838
BLCA	CCT5_mut	2	0	0.485671	0.940838
BLCA	CCT5_mut	3	0	0.485671	0.940838
BLCA	CCT5_mut	4	4.94595	0.485671	0.940838
BLCA	CCT5_mut	5	2.80328	0.485671	0.940838
BLCA	CCT5_mut	6	2.08333	0.485671	0.940838
BLCA	CD274_AMP	1	0.668281	0.907467	0.980533
BLCA	CD274_AMP	2	1.28214	0.907467	0.980533
BLCA	CD274_AMP	3	2.4403	0.907467	0.980533
BLCA	CD274_AMP	4	1.20608	0.907467	0.980533
BLCA	CD274_AMP	5	0.709746	0.907467	0.980533
BLCA	CD274_AMP	6	0.50641	0.907467	0.980533
BLCA	CD276_AMP	1	10	0.994781	0.995142
BLCA	CD276_AMP	2	0	0.994781	0.995142
BLCA	CD276_AMP	3	0	0.994781	0.995142
BLCA	CD276_AMP	4	0	0.994781	0.995142
BLCA	CD276_AMP	5	0	0.994781	0.995142
BLCA	CD276_AMP	6	0	0.994781	0.995142
BLCA	CD36_mut	1	0	0.870528	0.980533
BLCA	CD36_mut	2	0	0.870528	0.980533
BLCA	CD36_mut	3	0	0.870528	0.980533
BLCA	CD36_mut	4	0	0.870528	0.980533
BLCA	CD36_mut	5	0	0.870528	0.980533
BLCA	CD36_mut	6	10	0.870528	0.980533
BLCA	CDC27_mut	1	1.17917	0.386179	0.940838
BLCA	CDC27_mut	2	0	0.386179	0.940838
BLCA	CDC27_mut	3	2.33803	0.386179	0.940838
BLCA	CDC27_mut	4	0	0.386179	0.940838
BLCA	CDC27_mut	5	0	0.386179	0.940838
BLCA	CDC27_mut	6	2.08333	0.386179	0.940838
BLCA	CDC73_mut	1	0	0.226931	0.940838
BLCA	CDC73_mut	2	10.1944	0.226931	0.940838
BLCA	CDC73_mut	3	0	0.226931	0.940838
BLCA	CDC73_mut	4	9.89189	0.226931	0.940838
BLCA	CDC73_mut	5	0	0.226931	0.940838
BLCA	CDC73_mut	6	0	0.226931	0.940838
BLCA	CDH1_mut	1	0	0.0650407	0.92069
BLCA	CDH1_mut	2	2.03889	0.0650407	0.92069
BLCA	CDH1_mut	3	0	0.0650407	0.92069
BLCA	CDH1_mut	4	0	0.0650407	0.92069
BLCA	CDH1_mut	5	5.60656	0.0650407	0.92069
BLCA	CDH1_mut	6	2.08333	0.0650407	0.92069
BLCA	CDK12_mut	1	0.7075	0.459451	0.940838
BLCA	CDK12_mut	2	3.05833	0.459451	0.940838
BLCA	CDK12_mut	3	0.850192	0.459451	0.940838
BLCA	CDK12_mut	4	0.824324	0.459451	0.940838
BLCA	CDK12_mut	5	1.01937	0.459451	0.940838
BLCA	CDK12_mut	6	0.757576	0.459451	0.940838
BLCA	CDK2_AMP	1	1.75424	0.883882	0.980533
BLCA	CDK2_AMP	2	1.70952	0.883882	0.980533
BLCA	CDK2_AMP	3	0.813433	0.883882	0.980533
BLCA	CDK2_AMP	4	1.60811	0.883882	0.980533
BLCA	CDK2_AMP	5	0.946328	0.883882	0.980533
BLCA	CDK2_AMP	6	0	0.883882	0.980533
BLCA	CDK4_mut	1	0	0.639533	0.967145
BLCA	CDK4_mut	2	0	0.639533	0.967145
BLCA	CDK4_mut	3	0	0.639533	0.967145
BLCA	CDK4_mut	4	0	0.639533	0.967145
BLCA	CDK4_mut	5	5.60656	0.639533	0.967145
BLCA	CDK4_mut	6	4.16667	0.639533	0.967145
BLCA	CDK5_AMP	1	1.16949	0.903653	0.980533
BLCA	CDK5_AMP	2	0	0.903653	0.980533
BLCA	CDK5_AMP	3	2.4403	0.903653	0.980533
BLCA	CDK5_AMP	4	0	0.903653	0.980533
BLCA	CDK5_AMP	5	0	0.903653	0.980533
BLCA	CDK5_AMP	6	2.02564	0.903653	0.980533
BLCA	CDK6_AMP	1	1.16949	0.349458	0.940838
BLCA	CDK6_AMP	2	0	0.349458	0.940838
BLCA	CDK6_AMP	3	2.4403	0.349458	0.940838
BLCA	CDK6_AMP	4	0	0.349458	0.940838
BLCA	CDK6_AMP	5	2.83898	0.349458	0.940838
BLCA	CDK6_AMP	6	0	0.349458	0.940838
BLCA	CDKN1A_DEL	1	10	0.991168	0.995142
BLCA	CDKN1A_DEL	2	0	0.991168	0.995142
BLCA	CDKN1A_DEL	3	0	0.991168	0.995142
BLCA	CDKN1A_DEL	4	0	0.991168	0.995142
BLCA	CDKN1A_DEL	5	0	0.991168	0.995142
BLCA	CDKN1A_DEL	6	0	0.991168	0.995142
BLCA	CDKN1A_mut	1	1.88667	0.195528	0.940838
BLCA	CDKN1A_mut	2	0.926768	0.195528	0.940838
BLCA	CDKN1A_mut	3	0.584507	0.195528	0.940838
BLCA	CDKN1A_mut	4	0.581876	0.195528	0.940838
BLCA	CDKN1A_mut	5	1.12131	0.195528	0.940838
BLCA	CDKN1A_mut	6	0.672043	0.195528	0.940838
BLCA	CDKN1B_DEL	1	0.584746	0.150843	0.940838
BLCA	CDKN1B_DEL	2	2.56429	0.150843	0.940838
BLCA	CDKN1B_DEL	3	0	0.150843	0.940838
BLCA	CDKN1B_DEL	4	0	0.150843	0.940838
BLCA	CDKN1B_DEL	5	0	0.150843	0.940838
BLCA	CDKN1B_DEL	6	6.07692	0.150843	0.940838
BLCA	CDKN1B_mut	1	1.17917	0.395224	0.940838
BLCA	CDKN1B_mut	2	0	0.395224	0.940838
BLCA	CDKN1B_mut	3	2.33803	0.395224	0.940838
BLCA	CDKN1B_mut	4	0	0.395224	0.940838
BLCA	CDKN1B_mut	5	0	0.395224	0.940838
BLCA	CDKN1B_mut	6	2.08333	0.395224	0.940838
BLCA	CDKN2A_DEL	1	1.07953	0.373846	0.940838
BLCA	CDKN2A_DEL	2	1.11119	0.373846	0.940838
BLCA	CDKN2A_DEL	3	1.02049	0.373846	0.940838
BLCA	CDKN2A_DEL	4	0.784443	0.373846	0.940838
BLCA	CDKN2A_DEL	5	1.25019	0.373846	0.940838
BLCA	CDKN2A_DEL	6	0.759615	0.373846	0.940838
BLCA	CDKN2A_mut	1	0.786111	0.0971545	0.92943
BLCA	CDKN2A_mut	2	0	0.0971545	0.92943
BLCA	CDKN2A_mut	3	1.55869	0.0971545	0.92943
BLCA	CDKN2A_mut	4	1.41313	0.0971545	0.92943
BLCA	CDKN2A_mut	5	0.509687	0.0971545	0.92943
BLCA	CDKN2A_mut	6	1.71569	0.0971545	0.92943
BLCA	CDKN2B_DEL	1	1.06554	0.306002	0.940838
BLCA	CDKN2B_DEL	2	1.13002	0.306002	0.940838
BLCA	CDKN2B_DEL	3	1.03939	0.306002	0.940838
BLCA	CDKN2B_DEL	4	0.797409	0.306002	0.940838
BLCA	CDKN2B_DEL	5	1.27356	0.306002	0.940838
BLCA	CDKN2B_DEL	6	0.729961	0.306002	0.940838
BLCA	CDKN2B_mut	1	10	0.967683	0.980533
BLCA	CDKN2B_mut	2	0	0.967683	0.980533
BLCA	CDKN2B_mut	3	0	0.967683	0.980533
BLCA	CDKN2B_mut	4	0	0.967683	0.980533
BLCA	CDKN2B_mut	5	0	0.967683	0.980533
BLCA	CDKN2B_mut	6	0	0.967683	0.980533
BLCA	CDKN2C_mut	1	0	0.680589	0.967145
BLCA	CDKN2C_mut	2	0	0.680589	0.967145
BLCA	CDKN2C_mut	3	0	0.680589	0.967145
BLCA	CDKN2C_mut	4	0	0.680589	0.967145
BLCA	CDKN2C_mut	5	10	0.680589	0.967145
BLCA	CDKN2C_mut	6	0	0.680589	0.967145
BLCA	CEACAM1_AMP	1	0.292373	0.272481	0.940838
BLCA	CEACAM1_AMP	2	0	0.272481	0.940838
BLCA	CEACAM1_AMP	3	2.4403	0.272481	0.940838
BLCA	CEACAM1_AMP	4	1.20608	0.272481	0.940838
BLCA	CEACAM1_AMP	5	0.709746	0.272481	0.940838
BLCA	CEACAM1_AMP	6	2.02564	0.272481	0.940838
BLCA	CEBPA_mut	1	2.35833	0.919207	0.980533
BLCA	CEBPA_mut	2	0	0.919207	0.980533
BLCA	CEBPA_mut	3	0	0.919207	0.980533
BLCA	CEBPA_mut	4	0	0.919207	0.980533
BLCA	CEBPA_mut	5	0	0.919207	0.980533
BLCA	CEBPA_mut	6	4.16667	0.919207	0.980533
BLCA	CEP290_mut	1	2.35833	0.135264	0.940838
BLCA	CEP290_mut	2	0	0.135264	0.940838
BLCA	CEP290_mut	3	0	0.135264	0.940838
BLCA	CEP290_mut	4	4.94595	0.135264	0.940838
BLCA	CEP290_mut	5	0	0.135264	0.940838
BLCA	CEP290_mut	6	0.833333	0.135264	0.940838
BLCA	CHD1L_mut	1	0	0.344309	0.940838
BLCA	CHD1L_mut	2	0	0.344309	0.940838
BLCA	CHD1L_mut	3	0	0.344309	0.940838
BLCA	CHD1L_mut	4	9.89189	0.344309	0.940838
BLCA	CHD1L_mut	5	5.60656	0.344309	0.940838
BLCA	CHD1L_mut	6	0	0.344309	0.940838
BLCA	CHD2_mut	1	0.907051	0.485772	0.940838
BLCA	CHD2_mut	2	0	0.485772	0.940838
BLCA	CHD2_mut	3	1.33602	0.485772	0.940838
BLCA	CHD2_mut	4	0.581876	0.485772	0.940838
BLCA	CHD2_mut	5	1.12131	0.485772	0.940838
BLCA	CHD2_mut	6	1.60256	0.485772	0.940838
BLCA	CHD3_mut	1	1.76875	0.375203	0.940838
BLCA	CHD3_mut	2	0	0.375203	0.940838
BLCA	CHD3_mut	3	1.87042	0.375203	0.940838
BLCA	CHD3_mut	4	1.64865	0.375203	0.940838
BLCA	CHD3_mut	5	0.934426	0.375203	0.940838
BLCA	CHD3_mut	6	0	0.375203	0.940838
BLCA	CHD4_mut	1	0.643182	0.934654	0.980533
BLCA	CHD4_mut	2	0.784188	0.934654	0.980533
BLCA	CHD4_mut	3	0.779343	0.934654	0.980533
BLCA	CHD4_mut	4	1.64865	0.934654	0.980533
BLCA	CHD4_mut	5	1.52906	0.934654	0.980533
BLCA	CHD4_mut	6	1.13636	0.934654	0.980533
BLCA	CHD6_mut	1	0.67381	0.877134	0.980533
BLCA	CHD6_mut	2	1.27431	0.877134	0.980533
BLCA	CHD6_mut	3	1.33602	0.877134	0.980533
BLCA	CHD6_mut	4	1.23649	0.877134	0.980533
BLCA	CHD6_mut	5	1.60187	0.877134	0.980533
BLCA	CHD6_mut	6	0.520833	0.877134	0.980533
BLCA	CHD8_mut	1	1.04815	0.0932927	0.92943
BLCA	CHD8_mut	2	3.05833	0.0932927	0.92943
BLCA	CHD8_mut	3	0	0.0932927	0.92943
BLCA	CHD8_mut	4	0.824324	0.0932927	0.92943
BLCA	CHD8_mut	5	1.68197	0.0932927	0.92943
BLCA	CHD8_mut	6	0.757576	0.0932927	0.92943
BLCA	CHD9_mut	1	0	0.0856707	0.92943
BLCA	CHD9_mut	2	1.27431	0.0856707	0.92943
BLCA	CHD9_mut	3	1.33602	0.0856707	0.92943
BLCA	CHD9_mut	4	1.23649	0.0856707	0.92943
BLCA	CHD9_mut	5	4.48525	0.0856707	0.92943
BLCA	CHD9_mut	6	0.520833	0.0856707	0.92943
BLCA	CHEK2_DEL	1	0	0.636491	0.967145
BLCA	CHEK2_DEL	2	0	0.636491	0.967145
BLCA	CHEK2_DEL	3	0	0.636491	0.967145
BLCA	CHEK2_DEL	4	10	0.636491	0.967145
BLCA	CHEK2_DEL	5	0	0.636491	0.967145
BLCA	CHEK2_DEL	6	0	0.636491	0.967145
BLCA	CHEK2_mut	1	0.786111	0.547358	0.967145
BLCA	CHEK2_mut	2	0	0.547358	0.967145
BLCA	CHEK2_mut	3	0.668008	0.547358	0.967145
BLCA	CHEK2_mut	4	3.2973	0.547358	0.967145
BLCA	CHEK2_mut	5	0.800937	0.547358	0.967145
BLCA	CHEK2_mut	6	1.38889	0.547358	0.967145
BLCA	CIC_mut	1	0	0.0854675	0.92943
BLCA	CIC_mut	2	0	0.0854675	0.92943
BLCA	CIC_mut	3	0.935211	0.0854675	0.92943
BLCA	CIC_mut	4	0	0.0854675	0.92943
BLCA	CIC_mut	5	1.12131	0.0854675	0.92943
BLCA	CIC_mut	6	8.33333	0.0854675	0.92943
BLCA	CLASP2_mut	1	0.67381	0.473171	0.940838
BLCA	CLASP2_mut	2	2.9127	0.473171	0.940838
BLCA	CLASP2_mut	3	0.584507	0.473171	0.940838
BLCA	CLASP2_mut	4	0	0.473171	0.940838
BLCA	CLASP2_mut	5	0.70082	0.473171	0.940838
BLCA	CLASP2_mut	6	2.08333	0.473171	0.940838
BLCA	CLCN2_mut	1	1.76875	0.188211	0.940838
BLCA	CLCN2_mut	2	4.07778	0.188211	0.940838
BLCA	CLCN2_mut	3	0.779343	0.188211	0.940838
BLCA	CLCN2_mut	4	0	0.188211	0.940838
BLCA	CLCN2_mut	5	0	0.188211	0.940838
BLCA	CLCN2_mut	6	0.694444	0.188211	0.940838
BLCA	CLOCK_mut	1	1.76875	0.168496	0.940838
[truncated: 63,536 more rows]
